# Supplementary material for: Proteomic Characterization of a Lunasin-Enriched Soybean Extract Potentially Useful in the Treatment of <i>Helicobacter pylori </i>Infection
Source: Preprints.org preprint supplement (doi:10.20944/preprints202406.0165.v1), 2024-06-04
Supplement: Supplementary file 1 [file Table S1_Franca-Oliveira.xlsx]

## Sheet: Table S1
Protein Family Member	Protein Hit Number	Protein Accession Number	Protein Description	Protein Score	Protein Molecular Mass (Da)	Peptide Experimental Mass	Peptide Theoretical Mass	Peptide Delta Mass	Peptide Score	Peptide Expect	Peptide Sequence
1	1	P04405	Glycinin G2	11785	54927	840.413	840.409	0.0045	42.48	0.039	PPQESQR
						840.415	840.409	0.0059	42.46	0.04	PPQESQR
						926.496	926.493	0.0025	64.78	0.0049	NALKPDNR
						926.497	926.493	0.0039	64.6	0.0052	NALKPDNR
						926.501	926.493	0.0073	64.84	0.0048	NALKPDNR
						927.485	926.493	0.9919	44.61	0.049	NALKPDNR
						993.523	993.524	-0.0011	71.33	0.00021	LSAQYGSLR
						993.526	993.524	0.0019	72.68	0.0008	LSAQYGSLR
						993.527	993.524	0.0023	49.8	0.0045	LSAQYGSLR
						1039.57	1039.58	-0.0032	67.03	0.00016	LNALKPDNR
						1039.59	1039.58	0.0122	45.63	0.0036	LNALKPDNR
						1039.59	1039.58	0.0132	66.37	7.5e-05	LNALKPDNR
						1040.31	1039.58	0.7306	66.97	0.00011	LNALKPDNR
						1040.56	1040.56	0.001	57.46	0.024	LNALKPDNR
						1040.57	1039.58	0.9896	45.63	0.0023	LNALKPDNR
						1040.57	1039.58	0.9944	66.97	0.00011	LNALKPDNR
						1096.61	1096.6	0.0096	52.78	0.0016	"LNALKPDNR
						1096.61	1096.6	0.0106	50.04	0.0015	"LNALKPDNR
						1121.64	1121.62	0.0178	53.25	0.046	LSAQYGSLRK
						1148.52	1148.54	-0.0199	60.07	0.0013	VFDGELQEGGV
						1148.52	1148.54	-0.0139	60.31	0.002	VFDGELQEGGV
						1148.57	1148.54	0.0309	57.72	0.002	VFDGELQEGGV
						1148.57	1148.54	0.0327	48.47	0.0021	VFDGELQEGGV
						1148.57	1148.54	0.0335	55.66	0.0051	VFDGELQEGGV
						1194.5	1194.54	-0.0334	46.47	0.025	GIDETICTMR
						1194.53	1194.54	-0.0078	56.65	0.041	GIDETICTMR
						1195.53	1194.54	0.9878	46.47	0.032	GIDETICTMR
						1220.68	1220.68	0.0026	56.09	0.0023	ILSGFAPEFLK
						1251.58	1251.56	0.0253	46.57	0.0049	"GIDETICTMR
						1262.65	1262.64	0.0043	32.84	0.049	EAFGVNMQIVR
						1262.65	1262.64	0.0047	45.96	0.0023	EAFGVNMQIVR
						1262.65	1262.64	0.0079	31.75	0.033	EAFGVNMQIVR
						1262.65	1262.64	0.0093	38.05	0.0039	EAFGVNMQIVR
						1262.65	1262.64	0.0107	41.53	0.003	EAFGVNMQIVR
						1262.66	1262.64	0.0117	45.83	0.0011	EAFGVNMQIVR
						1262.66	1262.64	0.0135	52.29	0.0015	EAFGVNMQIVR
						1262.66	1262.64	0.0141	51.87	0.0038	EAFGVNMQIVR
						1262.66	1262.64	0.0143	54.75	0.0013	EAFGVNMQIVR
						1262.66	1262.64	0.0151	44.74	0.011	EAFGVNMQIVR
						1262.66	1262.64	0.0163	55.89	0.00063	EAFGVNMQIVR
						1262.67	1262.64	0.0269	78.61	2.1e-05	EAFGVNMQIVR
						1262.67	1262.64	0.0285	78.63	2.1e-05	EAFGVNMQIVR
						1262.67	1262.64	0.0309	78.32	2.1e-05	EAFGVNMQIVR
						1278.65	1278.64	0.016	60.72	0.00042	EAFGVNMQIVR
						1278.66	1278.64	0.0198	53.71	0.0035	EAFGVNMQIVR
						1278.66	1278.64	0.0214	56.96	0.0027	EAFGVNMQIVR
						1421.77	1421.76	0.0132	58.27	0.00042	SNILSGFAPEFLK
						1421.77	1421.76	0.0144	59.11	0.00069	SNILSGFAPEFLK
						1421.77	1421.76	0.0144	57.91	0.0007	SNILSGFAPEFLK
						1446.77	1446.74	0.0311	72.25	3.9e-05	NKPFQCAGVALSR
						1446.78	1446.74	0.0349	69.19	3.5e-05	NKPFQCAGVALSR
						1446.78	1446.74	0.0367	69.36	3.7e-05	NKPFQCAGVALSR
						1449.61	1449.64	-0.0362	81.86	1.8e-06	SQSDNFEYVSFK
						1449.61	1449.64	-0.0346	81.85	2.5e-06	SQSDNFEYVSFK
						1449.61	1449.64	-0.0312	81.54	1.2e-06	SQSDNFEYVSFK
						1449.61	1449.64	-0.0308	81.57	1.5e-06	SQSDNFEYVSFK
						1449.61	1449.64	-0.0298	81.87	1.2e-06	SQSDNFEYVSFK
						1449.65	1449.64	0.0112	81.48	2e-06	SQSDNFEYVSFK
						1449.65	1449.64	0.0124	75.69	2.3e-05	SQSDNFEYVSFK
						1449.66	1449.64	0.0196	29.29	0.023	SQSDNFEYVSFK
						1449.67	1449.64	0.024	75.83	3.5e-06	SQSDNFEYVSFK
						1451.63	1451.61	0.025	44.72	0.003	SQSDNFEYVSFK
						1451.63	1451.61	0.0254	44.42	0.0023	SQSDNFEYVSFK
						1493.69	1493.69	0.009	68.33	6.1e-05	YQQQQQGGSQSQK
						1493.7	1493.69	0.0094	33.57	0.0073	YQQQQQGGSQSQK
						1493.7	1493.69	0.0114	50.41	0.0027	YQQQQQGGSQSQK
						1506.7	1506.66	0.0336	36.52	0.0056	"SQSDNFEYVSFK
						1506.7	1506.66	0.038	34.15	0.01	"SQSDNFEYVSFK
						1585.79	1585.78	0.0168	41.77	0.0013	FYLAGNQEQEFLK
						1585.8	1585.78	0.018	56.53	0.00015	FYLAGNQEQEFLK
						1585.8	1585.78	0.0194	51.33	0.0011	FYLAGNQEQEFLK
						1585.8	1585.78	0.02	48.17	0.00079	FYLAGNQEQEFLK
						1585.8	1585.78	0.021	50	0.0014	FYLAGNQEQEFLK
						1585.8	1585.78	0.0216	42.54	0.0022	FYLAGNQEQEFLK
						1585.8	1585.78	0.0218	68.9	9.6e-06	FYLAGNQEQEFLK
						1585.8	1585.78	0.0218	41.82	0.004	FYLAGNQEQEFLK
						1586.79	1586.76	0.0244	49.21	0.0012	FYLAGNQEQEFLK
						1586.79	1586.76	0.0298	32.91	0.028	FYLAGNQEQEFLK
						1586.79	1586.76	0.0322	31.88	0.03	FYLAGNQEQEFLK
						1589.82	1589.81	0.0107	33.58	0.022	*EGSNILSGFAPEFLK
						1607.84	1607.82	0.0181	50.8	0.00089	EGSNILSGFAPEFLK
						1607.84	1607.82	0.0191	42.72	0.0019	EGSNILSGFAPEFLK
						1607.84	1607.82	0.0197	52.7	0.00079	EGSNILSGFAPEFLK
						1637.88	1637.88	0.0054	48.11	0.00095	ALPEEVIQHTFNLK
						1637.88	1637.88	0.006	33.35	0.013	ALPEEVIQHTFNLK
						1637.88	1637.88	0.006	48.83	0.00058	ALPEEVIQHTFNLK
						1637.9	1637.88	0.0272	94.87	1.1e-07	ALPEEVIQHTFNLK
						1637.91	1637.88	0.0278	90.07	3.1e-07	ALPEEVIQHTFNLK
						1637.91	1637.88	0.0328	80.48	1.4e-06	ALPEEVIQHTFNLK
						1642.82	1642.8	0.0228	68.73	2e-05	"FYLAGNQEQEFLK
						1642.82	1642.8	0.0258	45.92	0.0017	"FYLAGNQEQEFLK
						1642.83	1642.8	0.0266	53.62	0.00041	"FYLAGNQEQEFLK
						1644.84	1644.83	0.0136	36.96	0.02	NPFSFLVPPQESQR
						1741.86	1741.88	-0.0153	109.17	2.2e-07	RFYLAGNQEQEFLK
						1741.87	1741.88	-0.0115	91.68	3.2e-06	RFYLAGNQEQEFLK
						1741.87	1741.88	-0.0113	91.3	2.1e-06	RFYLAGNQEQEFLK
						1741.88	1741.88	0.0062	29.96	0.047	RFYLAGNQEQEFLK
						1741.89	1741.88	0.0107	31.55	0.027	RFYLAGNQEQEFLK
						1741.89	1741.88	0.0123	93.52	5.2e-06	RFYLAGNQEQEFLK
						1741.9	1741.88	0.0169	49.37	0.0098	RFYLAGNQEQEFLK
						1741.9	1741.88	0.0169	41.15	0.007	RFYLAGNQEQEFLK
						1741.9	1741.88	0.0173	66.11	0.00013	RFYLAGNQEQEFLK
						1741.9	1741.88	0.0183	63.37	0.00033	RFYLAGNQEQEFLK
						1741.9	1741.88	0.0235	61.36	0.0051	RFYLAGNQEQEFLK
						1741.91	1742.86	-0.9573	84.84	6.1e-05	RFYLAGNQEQEFLK
						1741.91	1741.88	0.0279	57.18	0.013	RFYLAGNQEQEFLK
						1741.91	1741.88	0.0341	93.9	2.6e-06	RFYLAGNQEQEFLK
						1741.91	1741.88	0.0343	99.21	4.4e-07	RFYLAGNQEQEFLK
						1741.91	1742.86	-0.9491	89.79	2e-05	RFYLAGNQEQEFLK
						1742.88	1742.86	0.0201	84.84	3.7e-06	RFYLAGNQEQEFLK
						1742.88	1742.86	0.0211	89.79	9.3e-07	RFYLAGNQEQEFLK
						1758.89	1758.87	0.0195	41.01	0.0071	NNPFSFLVPPQESQR
						1758.89	1758.87	0.0239	50.25	0.002	NNPFSFLVPPQESQR
						1771.88	1771.86	0.0158	90.03	1.8e-05	LREQAQQNECQIQK
						1771.88	1771.86	0.02	87.24	3.5e-05	LREQAQQNECQIQK
						1798.93	1798.9	0.0289	94.9	6e-06	"RFYLAGNQEQEFLK
						1798.93	1798.9	0.0335	94.77	6.1e-06	"RFYLAGNQEQEFLK
						1798.94	1798.9	0.0355	91.68	5.5e-06	"RFYLAGNQEQEFLK
						1872.89	1872.91	-0.0206	69.13	5.9e-05	NNNPFSFLVPPQESQR
						1872.89	1872.91	-0.0186	68.8	0.0015	NNNPFSFLVPPQESQR
						1872.91	1872.91	-0.0048	68.79	0.0023	NNNPFSFLVPPQESQR
						1872.92	1872.91	0.0107	36.43	0.031	NNNPFSFLVPPQESQR
						1872.93	1872.91	0.0174	33.02	0.021	NNNPFSFLVPPQESQR
						1872.93	1872.91	0.0188	51.42	0.00066	NNNPFSFLVPPQESQR
						1872.93	1872.91	0.023	66.33	4.2e-05	NNNPFSFLVPPQESQR
						1873.91	1873.9	0.019	48.99	0.00081	NNNPFSFLVPPQESQR
						1873.92	1873.9	0.0246	65.98	3.1e-05	NNNPFSFLVPPQESQR
						1873.92	1873.9	0.0266	69.26	1.7e-05	NNNPFSFLVPPQESQR
						1873.93	1873.9	0.0308	69.24	2e-05	NNNPFSFLVPPQESQR
						1874.89	1873.9	0.9894	68.46	6.6e-06	NNNPFSFLVPPQESQR
						1875.94	1875.86	0.078	54.27	0.00024	NNNPFSFLVPPQESQR
						1875.94	1875.86	0.0808	53.88	0.00024	NNNPFSFLVPPQESQR
						1876.95	1876.99	-0.0402	57.71	0.00025	PEFLKEAFGVNMQIVR
						1876.95	1876.99	-0.0372	63.25	0.00011	PEFLKEAFGVNMQIVR
						1929.96	1929.93	0.0283	53.41	0.001	"NNNPFSFLVPPQESQR
						1930.9	1930.91	-0.0153	130.91	1.4e-10	NLQGENEEEDSGAIVTVK
						1930.9	1930.91	-0.0149	144.95	8.5e-12	NLQGENEEEDSGAIVTVK
						1930.9	1930.91	-0.0099	131.04	2e-10	NLQGENEEEDSGAIVTVK
						1930.9	1930.91	-0.0089	121.83	1e-09	NLQGENEEEDSGAIVTVK
						1930.9	1930.91	-0.0077	151.93	1.9e-12	NLQGENEEEDSGAIVTVK
						1930.92	1931.9	-0.9791	58.89	0.024	NLQGENEEEDSGAIVTVK
						1930.92	1930.91	0.0063	80.4	1.4e-06	NLQGENEEEDSGAIVTVK
						1930.93	1930.91	0.0139	125.65	9.8e-10	NLQGENEEEDSGAIVTVK
						1930.93	1930.91	0.0139	42.06	0.0027	NLQGENEEEDSGAIVTVK
						1930.93	1930.91	0.0147	90.74	1.3e-07	NLQGENEEEDSGAIVTVK
						1930.93	1930.91	0.0155	75.76	1.9e-06	NLQGENEEEDSGAIVTVK
						1930.93	1930.91	0.0217	30.02	0.0079	NLQGENEEEDSGAIVTVK
						1930.94	1930.91	0.0261	42.65	0.00085	NLQGENEEEDSGAIVTVK
						1930.94	1930.91	0.0305	79.25	3.5e-06	NLQGENEEEDSGAIVTVK
						1930.94	1930.91	0.0307	75.28	2.3e-06	NLQGENEEEDSGAIVTVK
						1930.95	1930.91	0.0339	85.59	5.9e-07	NLQGENEEEDSGAIVTVK
						1930.95	1930.91	0.0345	48.19	0.00047	NLQGENEEEDSGAIVTVK
						1930.95	1930.91	0.0371	147.97	4.9e-12	NLQGENEEEDSGAIVTVK
						2065.13	2066.1	-0.9773	62.32	0.01	SLLNALPEEVIQHTFNLK
						2065.13	2065.12	0.0067	75.13	3.4e-06	SLLNALPEEVIQHTFNLK
						2065.13	2066.1	-0.9746	63.13	0.0087	SLLNALPEEVIQHTFNLK
						2065.13	2065.12	0.0131	52.63	0.00073	SLLNALPEEVIQHTFNLK
						2065.14	2065.12	0.0143	33.73	0.045	SLLNALPEEVIQHTFNLK
						2065.14	2065.12	0.0147	35.96	0.012	SLLNALPEEVIQHTFNLK
						2065.14	2065.12	0.0217	53.93	9e-05	SLLNALPEEVIQHTFNLK
						2152.06	2152.01	0.0502	75.49	4.5e-05	NFAVAAKSQSDNFEYVSFK
						2152.08	2152.01	0.0652	38.02	0.024	NFAVAAKSQSDNFEYVSFK
						2152.08	2152.01	0.0655	55.78	0.00032	NFAVAAKSQSDNFEYVSFK
						2348.09	2348.08	0.01	54.55	0.00041	*QQEEENEGSNILSGFAPEFLK
						2348.09	2348.08	0.0118	62.27	6e-05	*QQEEENEGSNILSGFAPEFLK
						2348.1	2348.08	0.0157	56.77	0.00027	*QQEEENEGSNILSGFAPEFLK
						2348.12	2348.08	0.0348	99.56	2.5e-08	*QQEEENEGSNILSGFAPEFLK
						2348.12	2348.08	0.0404	98.93	1.5e-08	*QQEEENEGSNILSGFAPEFLK
						2348.12	2348.08	0.0426	78.01	1.1e-06	*QQEEENEGSNILSGFAPEFLK
						2348.13	2348.08	0.0458	93.87	3.8e-08	*QQEEENEGSNILSGFAPEFLK
						2348.13	2348.08	0.0462	106.51	3.6e-09	*QQEEENEGSNILSGFAPEFLK
						2348.13	2348.08	0.0498	75.7	3e-06	*QQEEENEGSNILSGFAPEFLK
						2365.1	2366.09	-0.9959	56.36	0.00021	QQEEENEGSNILSGFAPEFLK
						2365.11	2365.11	0.0053	84.47	9.5e-06	QQEEENEGSNILSGFAPEFLK
						2365.12	2365.11	0.0145	91.37	1.3e-07	QQEEENEGSNILSGFAPEFLK
						2365.13	2365.11	0.0183	82.53	8.5e-07	QQEEENEGSNILSGFAPEFLK
						2365.13	2365.11	0.0195	77.64	2.5e-06	QQEEENEGSNILSGFAPEFLK
						2365.13	2365.11	0.0207	80.87	1.2e-06	QQEEENEGSNILSGFAPEFLK
						2365.14	2365.11	0.0287	91.85	2.2e-07	QQEEENEGSNILSGFAPEFLK
						2365.14	2365.11	0.0305	50.8	0.00037	QQEEENEGSNILSGFAPEFLK
						2368.12	2368.06	0.0651	46.05	0.0015	QQEEENEGSNILSGFAPEFLK
						2368.13	2368.06	0.0717	56.36	0.00017	QQEEENEGSNILSGFAPEFLK
						2368.13	2368.06	0.0721	60.76	0.00022	QQEEENEGSNILSGFAPEFLK
						2400.28	2400.27	0.0087	52.27	0.0021	VFDGELQEGGVLIVPQNFAVAAK
						2400.28	2400.27	0.0132	53.67	0.005	VFDGELQEGGVLIVPQNFAVAAK
						2400.28	2400.27	0.0141	35.03	0.0058	VFDGELQEGGVLIVPQNFAVAAK
						2400.29	2400.27	0.0165	66.51	0.00027	VFDGELQEGGVLIVPQNFAVAAK
						2400.29	2400.27	0.0203	30.96	0.022	VFDGELQEGGVLIVPQNFAVAAK
						2400.3	2400.27	0.0279	67.09	0.00024	VFDGELQEGGVLIVPQNFAVAAK
						2478.26	2478.25	0.0172	93.47	3.7e-08	NAMFVPHYTLNANSIIYALNGR
						2478.27	2478.25	0.0202	117.47	2.8e-10	NAMFVPHYTLNANSIIYALNGR
						2478.27	2478.25	0.0235	125.46	1.6e-10	NAMFVPHYTLNANSIIYALNGR
						2479.23	2479.23	0.0019	90.24	6.5e-06	NAMFVPHYTLNANSIIYALNGR
						2479.25	2479.23	0.016	45.92	0.00056	NAMFVPHYTLNANSIIYALNGR
						2479.26	2479.23	0.0241	121.95	4.6e-11	NAMFVPHYTLNANSIIYALNGR
						2480.23	2480.22	0.01	116.19	2.3e-08	NAMFVPHYTLNANSIIYALNGR
						2535.27	2535.27	0.003	35.95	0.0073	"NAMFVPHYTLNANSIIYALNGR
						2550.22	2550.22	-0.0026	71.88	1.1e-05	GKQQEEENEGSNILSGFAPEFLK
						2550.23	2550.22	0.0055	68.76	1.5e-05	GKQQEEENEGSNILSGFAPEFLK
						2550.24	2550.22	0.0142	94.61	2.1e-07	GKQQEEENEGSNILSGFAPEFLK
						2550.24	2550.22	0.0193	53.87	0.0029	GKQQEEENEGSNILSGFAPEFLK
						2550.24	2550.22	0.0199	62.92	3e-05	GKQQEEENEGSNILSGFAPEFLK
						2550.24	2550.22	0.0208	57.04	0.0031	GKQQEEENEGSNILSGFAPEFLK
						2550.24	2550.22	0.0211	80.9	1.2e-05	GKQQEEENEGSNILSGFAPEFLK
						2550.25	2550.22	0.022	63.2	3.5e-05	GKQQEEENEGSNILSGFAPEFLK
						2550.25	2550.22	0.0244	65.87	0.0002	GKQQEEENEGSNILSGFAPEFLK
						2550.25	2550.22	0.0265	67.98	3.7e-05	GKQQEEENEGSNILSGFAPEFLK
						2550.25	2550.22	0.028	71.64	3.1e-05	GKQQEEENEGSNILSGFAPEFLK
						2550.25	2550.22	0.028	58.04	0.00025	GKQQEEENEGSNILSGFAPEFLK
						2550.25	2550.22	0.0307	94.39	9.3e-07	GKQQEEENEGSNILSGFAPEFLK
						2606.35	2606.34	0.0046	73.3	8.5e-06	KNAMFVPHYTLNANSIIYALNGR
						2606.35	2606.34	0.0049	61.03	1.8e-05	KNAMFVPHYTLNANSIIYALNGR
						2607.24	2607.25	-0.004	60.25	3.5e-05	"GKQQEEENEGSNILSGFAPEFLK
						2607.25	2608.23	-0.9814	53.42	0.00014	"GKQQEEENEGSNILSGFAPEFLK
						2607.27	2607.25	0.0242	28.77	0.023	"GKQQEEENEGSNILSGFAPEFLK
						2607.27	2608.23	-0.9595	56.22	6.8e-05	"GKQQEEENEGSNILSGFAPEFLK
						2656.24	2656.2	0.0314	87.31	3e-07	GIFGMIFPGCPSTYQEPQESQQR
						2656.24	2656.2	0.0314	63.14	2.8e-05	GIFGMIFPGCPSTYQEPQESQQR
						2690.1	2690.08	0.0224	88.49	1.6e-07	KPQQEEDDDDEEEQPQCVETDK
						2690.1	2690.08	0.0227	103.39	8.5e-09	KPQQEEDDDDEEEQPQCVETDK
						2690.11	2690.08	0.0302	97.21	4e-08	KPQQEEDDDDEEEQPQCVETDK
						2885.31	2885.42	-0.1061	47.16	0.00097	"GVNMQIVRNLQGENEEEDSGAIVTVK
						2885.31	2885.42	-0.1052	27.07	0.032	"GVNMQIVRNLQGENEEEDSGAIVTVK
						2902.39	2902.4	-0.0087	32.33	0.026	"GVNMQIVRNLQGENEEEDSGAIVTVK
						3005.55	3005.54	0.0154	37.63	0.012	SSPDIYNPQAGSITTATSLDFPALWLLK
						3020.4	3020.45	-0.0411	164.98	1.4e-14	IESEGGFIETWNPNNKPFQCAGVALSR
						3020.41	3020.45	-0.039	160.95	2.3e-14	IESEGGFIETWNPNNKPFQCAGVALSR
						3020.41	3020.45	-0.0378	165.03	9.5e-15	IESEGGFIETWNPNNKPFQCAGVALSR
						3020.45	3020.45	0.003	63.53	9.1e-06	IESEGGFIETWNPNNKPFQCAGVALSR
						3020.45	3020.45	0.0054	138	1.1e-12	IESEGGFIETWNPNNKPFQCAGVALSR
						3020.45	3020.45	0.0059	82.94	1.8e-07	IESEGGFIETWNPNNKPFQCAGVALSR
						3020.45	3020.45	0.0084	144.93	2e-12	IESEGGFIETWNPNNKPFQCAGVALSR
						3020.46	3020.45	0.0141	95.08	1.9e-08	IESEGGFIETWNPNNKPFQCAGVALSR
						3020.46	3020.45	0.0147	116.34	4.6e-10	IESEGGFIETWNPNNKPFQCAGVALSR
						3020.46	3020.45	0.0163	65.86	9.3e-06	IESEGGFIETWNPNNKPFQCAGVALSR
						3020.46	3020.45	0.0189	106.07	1.2e-09	IESEGGFIETWNPNNKPFQCAGVALSR
						3020.47	3020.45	0.0207	52.06	0.00024	IESEGGFIETWNPNNKPFQCAGVALSR
						3020.48	3020.45	0.0309	196.21	1.9e-17	IESEGGFIETWNPNNKPFQCAGVALSR
						3020.48	3020.45	0.0312	90.03	6.2e-08	IESEGGFIETWNPNNKPFQCAGVALSR
						3020.48	3020.45	0.0366	170.65	5.9e-15	IESEGGFIETWNPNNKPFQCAGVALSR
						3020.48	3020.45	0.0369	186.07	3.8e-16	IESEGGFIETWNPNNKPFQCAGVALSR
						3020.48	3020.45	0.0375	139.56	3e-12	IESEGGFIETWNPNNKPFQCAGVALSR
						3020.49	3020.45	0.0435	199.71	8.6e-18	IESEGGFIETWNPNNKPFQCAGVALSR
						3023.47	3023.4	0.0774	30.6	0.015	IESEGGFIETWNPNNKPFQCAGVALSR
						3023.48	3023.4	0.0864	34.06	0.0099	IESEGGFIETWNPNNKPFQCAGVALSR
						3077.5	3077.47	0.032	185.25	9.5e-17	"IESEGGFIETWNPNNKPFQCAGVALSR
						3077.51	3077.47	0.0389	35.9	0.0091	"IESEGGFIETWNPNNKPFQCAGVALSR
						3077.51	3077.47	0.041	66.35	1.3e-05	"IESEGGFIETWNPNNKPFQCAGVALSR
						3090.57	3090.57	0.0015	57.94	6.9e-05	TNDRPSIGNLAGANSLLNALPEEVIQHTF
						3174.53	3174.51	0.0193	120.17	5.9e-09	YNNEDTPVVAVSIIDTNSLENQLDQMPR
						3191.3	3191.29	0.014	129.22	2.5e-11	KPQQEEDDDDEEEQPQCVETDKGCQR
						3191.31	3191.29	0.017	87.97	1.7e-07	KPQQEEDDDDEEEQPQCVETDKGCQR
						3191.31	3191.29	0.0251	143.5	1.2e-12	KPQQEEDDDDEEEQPQCVETDKGCQR
						3191.32	3191.29	0.0306	100.69	1.4e-08	KPQQEEDDDDEEEQPQCVETDKGCQR
						3191.32	3191.29	0.0314	109.67	2.7e-09	KPQQEEDDDDEEEQPQCVETDKGCQR
						3191.33	3191.29	0.0394	128.94	4e-11	KPQQEEDDDDEEEQPQCVETDKGCQR
						3404.74	3404.72	0.0191	36.35	0.018	"NDRPSIGNLAGANSLLNALPEEVIQHTFNLK
						3445.75	3445.8	-0.0488	126.8	1.2e-10	TNDRPSIGNLAGANSLLNALPEEVIQHTFNLK
						3445.77	3445.8	-0.0238	46.56	0.00061	TNDRPSIGNLAGANSLLNALPEEVIQHTFNLK
						3445.78	3445.8	-0.0196	116.57	9.7e-10	TNDRPSIGNLAGANSLLNALPEEVIQHTFNLK
						3445.78	3445.8	-0.0172	66.33	6e-06	TNDRPSIGNLAGANSLLNALPEEVIQHTFNLK
						3445.79	3445.8	-0.0064	115.71	2.4e-08	TNDRPSIGNLAGANSLLNALPEEVIQHTFNLK
						3445.79	3445.8	-0.0024	111.97	4.3e-09	TNDRPSIGNLAGANSLLNALPEEVIQHTFNLK
						3445.8	3445.8	0.0012	81.24	2.6e-06	TNDRPSIGNLAGANSLLNALPEEVIQHTFNLK
						3445.8	3445.8	0.0035	44.09	0.0015	TNDRPSIGNLAGANSLLNALPEEVIQHTFNLK
						3445.8	3445.8	0.0048	65.94	5.3e-05	TNDRPSIGNLAGANSLLNALPEEVIQHTFNLK
						3445.8	3445.8	0.0068	116.51	2e-09	TNDRPSIGNLAGANSLLNALPEEVIQHTFNLK
						3445.81	3445.8	0.012	146.07	3.6e-12	TNDRPSIGNLAGANSLLNALPEEVIQHTFNLK
						3445.81	3446.78	-0.9691	46.6	0.0016	TNDRPSIGNLAGANSLLNALPEEVIQHTFNLK
						3445.81	3445.8	0.0176	104.54	9.5e-08	TNDRPSIGNLAGANSLLNALPEEVIQHTFNLK
						3445.81	3445.8	0.0188	142.39	8.5e-12	TNDRPSIGNLAGANSLLNALPEEVIQHTFNLK
						3445.82	3445.8	0.0212	152.41	6.7e-13	TNDRPSIGNLAGANSLLNALPEEVIQHTFNLK
						3445.82	3445.8	0.0215	120.75	7.9e-11	TNDRPSIGNLAGANSLLNALPEEVIQHTFNLK
						3445.82	3445.8	0.022	136.78	1.1e-11	TNDRPSIGNLAGANSLLNALPEEVIQHTFNLK
						3445.82	3445.8	0.0224	101.66	7.8e-08	TNDRPSIGNLAGANSLLNALPEEVIQHTFNLK
						3445.82	3445.8	0.0269	125.34	6.6e-11	TNDRPSIGNLAGANSLLNALPEEVIQHTFNLK
						3445.82	3445.8	0.0281	119.13	1.7e-10	TNDRPSIGNLAGANSLLNALPEEVIQHTFNLK
						3445.82	3445.8	0.0296	114.58	4.5e-09	TNDRPSIGNLAGANSLLNALPEEVIQHTFNLK
						3445.83	3445.8	0.0302	141.64	2.4e-12	TNDRPSIGNLAGANSLLNALPEEVIQHTFNLK
						3445.83	3445.8	0.0323	96.13	3.2e-08	TNDRPSIGNLAGANSLLNALPEEVIQHTFNLK
						3445.83	3445.8	0.0356	121.21	1.3e-10	TNDRPSIGNLAGANSLLNALPEEVIQHTFNLK
						3446.78	3445.8	0.9876	81.24	4.7e-06	TNDRPSIGNLAGANSLLNALPEEVIQHTFNLK
						3446.79	3445.8	0.9928	111.97	4.5e-09	TNDRPSIGNLAGANSLLNALPEEVIQHTFNLK
						3446.79	3445.8	0.9936	65.94	0.00012	TNDRPSIGNLAGANSLLNALPEEVIQHTFNLK
						3446.79	3446.78	0.0148	102.08	7.2e-07	TNDRPSIGNLAGANSLLNALPEEVIQHTFNLK
						3446.8	3446.78	0.0168	104.54	2.7e-08	TNDRPSIGNLAGANSLLNALPEEVIQHTFNLK
						3446.8	3446.78	0.0188	47.7	0.00056	TNDRPSIGNLAGANSLLNALPEEVIQHTFNLK
						3446.8	3446.78	0.0218	47.66	0.00027	TNDRPSIGNLAGANSLLNALPEEVIQHTFNLK
						3446.81	3446.78	0.0344	59.65	0.00012	TNDRPSIGNLAGANSLLNALPEEVIQHTFNLK
						3643.82	3643.8	0.0141	87.88	1.8e-05	*QNIGQNSSPDIYNPQAGSITTATSLDFPALWLLK
						3659.85	3660.83	-0.9835	131.79	7e-10	QNIGQNSSPDIYNPQAGSITTATSLDFPALWLLK
						3659.86	3659.85	0.0086	157.45	2.4e-14	QNIGQNSSPDIYNPQAGSITTATSLDFPALWLLK
						3659.88	3659.85	0.0294	155.14	4.7e-14	QNIGQNSSPDIYNPQAGSITTATSLDFPALWLLK
						3660.86	3660.83	0.0263	98.1	2.3e-08	QNIGQNSSPDIYNPQAGSITTATSLDFPALWLLK
						3929.04	3929.03	0.0105	145.62	2.1e-13	LRQNIGQNSSPDIYNPQAGSITTATSLDFPALWLLK
						3929.04	3929.03	0.0114	130.42	4.7e-12	LRQNIGQNSSPDIYNPQAGSITTATSLDFPALWLLK
						4603.1	4603.12	-0.0159	135.54	1.9e-10	RPSYTNGPQEIYIQQGNGIFGMIFPGCPSTYQEPQESQQR
						4603.11	4603.12	-0.012	122.08	4.3e-09	RPSYTNGPQEIYIQQGNGIFGMIFPGCPSTYQEPQESQQR
						4604.09	4604.1	-0.0153	156.39	1.6e-12	RPSYTNGPQEIYIQQGNGIFGMIFPGCPSTYQEPQESQQR
						4604.1	4604.1	0.0024	131.43	5e-10	RPSYTNGPQEIYIQQGNGIFGMIFPGCPSTYQEPQESQQR
						4660.13	4660.14	-0.01	30.63	0.029	"RPSYTNGPQEIYIQQGNGIFGMIFPGCPSTYQEPQESQQR
						4661.1	4661.12	-0.0217	71.27	3e-05	"RPSYTNGPQEIYIQQGNGIFGMIFPGCPSTYQEPQESQQR
	2	P04776	Glycinin G1	9606	56299	926.496	926.493	0.0025	64.78	0.0049	NALKPDNR
						926.497	926.493	0.0039	64.6	0.0052	NALKPDNR
						926.501	926.493	0.0073	64.84	0.0048	NALKPDNR
						927.485	926.493	0.9919	44.61	0.049	NALKPDNR
						978.477	978.513	-0.0362	62.71	0.0036	LSAEFGSLR
						978.48	978.513	-0.0336	62.68	0.0035	LSAEFGSLR
						978.484	978.513	-0.0296	64.81	0.0022	LSAEFGSLR
						979.509	978.513	0.9956	62.72	0.0096	LSAEFGSLR
						979.509	978.513	0.9956	62.69	0.0096	LSAEFGSLR
						979.511	978.513	0.9974	64.81	0.0059	LSAEFGSLR
						1039.57	1039.58	-0.0032	67.03	0.00016	LNALKPDNR
						1039.59	1039.58	0.0122	45.63	0.0036	LNALKPDNR
						1039.59	1039.58	0.0132	66.37	7.5e-05	LNALKPDNR
						1040.31	1039.58	0.7306	66.97	0.00011	LNALKPDNR
						1040.56	1040.56	0.001	57.46	0.024	LNALKPDNR
						1040.57	1039.58	0.9896	45.63	0.0023	LNALKPDNR
						1040.57	1039.58	0.9944	66.97	0.00011	LNALKPDNR
						1096.61	1096.6	0.0096	52.78	0.0016	"LNALKPDNR
						1096.61	1096.6	0.0106	50.04	0.0015	"LNALKPDNR
						1148.52	1148.55	-0.0312	60.07	0.0013	VFDGELQEGR
						1148.52	1148.55	-0.0252	60.31	0.002	VFDGELQEGR
						1148.57	1148.55	0.0196	57.72	0.002	VFDGELQEGR
						1148.57	1148.55	0.0214	48.47	0.0021	VFDGELQEGR
						1148.57	1148.55	0.0222	55.66	0.0051	VFDGELQEGR
						1194.5	1194.54	-0.0334	46.47	0.025	GIDETICTMR
						1194.53	1194.54	-0.0078	56.65	0.041	GIDETICTMR
						1195.53	1194.54	0.9878	46.47	0.032	GIDETICTMR
						1231.56	1231.53	0.0262	34.81	0.032	NLQGENEGEDK
						1251.58	1251.56	0.0253	46.57	0.0049	"GIDETICTMR
						1371.72	1371.69	0.0224	29.37	0.038	ALIQVVNCNGER
						1371.72	1371.69	0.0268	35.48	0.039	ALIQVVNCNGER
						1416.64	1416.64	0.004	83.06	4.7e-06	YQQEQGGHQSQK
						1416.65	1416.64	0.0116	102.58	3.5e-08	YQQEQGGHQSQK
						1424.8	1424.85	-0.0543	62.81	0.0026	VLIVPQNFVVAAR
						1424.8	1424.85	-0.0463	62.85	0.0026	VLIVPQNFVVAAR
						1424.81	1424.85	-0.0397	62.93	0.0027	VLIVPQNFVVAAR
						1446.77	1446.74	0.0311	72.25	3.9e-05	NKPFQCAGVALSR
						1446.78	1446.74	0.0349	69.19	3.5e-05	NKPFQCAGVALSR
						1446.78	1446.74	0.0367	69.36	3.7e-05	NKPFQCAGVALSR
						1449.61	1449.64	-0.0362	81.86	1.8e-06	SQSDNFEYVSFK
						1449.61	1449.64	-0.0346	81.85	2.5e-06	SQSDNFEYVSFK
						1449.61	1449.64	-0.0312	81.54	1.2e-06	SQSDNFEYVSFK
						1449.61	1449.64	-0.0308	81.57	1.5e-06	SQSDNFEYVSFK
						1449.61	1449.64	-0.0298	81.87	1.2e-06	SQSDNFEYVSFK
						1449.65	1449.64	0.0112	81.48	2e-06	SQSDNFEYVSFK
						1449.65	1449.64	0.0124	75.69	2.3e-05	SQSDNFEYVSFK
						1449.66	1449.64	0.0196	29.29	0.023	SQSDNFEYVSFK
						1449.67	1449.64	0.024	75.83	3.5e-06	SQSDNFEYVSFK
						1451.63	1451.61	0.025	44.72	0.003	SQSDNFEYVSFK
						1451.63	1451.61	0.0254	44.42	0.0023	SQSDNFEYVSFK
						1481.89	1481.87	0.0224	53.42	0.0016	"VLIVPQNFVVAAR
						1481.89	1481.87	0.0228	51.2	0.0017	"VLIVPQNFVVAAR
						1481.9	1481.87	0.0262	49.99	0.0085	"VLIVPQNFVVAAR
						1503.72	1503.69	0.0268	32.61	0.032	NAMFVPHYNLNAN
						1506.7	1506.66	0.0336	36.52	0.0056	"SQSDNFEYVSFK
						1506.7	1506.66	0.038	34.15	0.01	"SQSDNFEYVSFK
						1528.68	1528.69	-0.0171	55.15	0.016	EQPQQNECQIQK
						1528.69	1528.69	-0.0029	60.47	0.017	EQPQQNECQIQK
						1528.71	1528.69	0.0159	54.9	0.0019	EQPQQNECQIQK
						1528.71	1528.69	0.0195	58.32	0.0019	EQPQQNECQIQK
						1528.71	1528.69	0.0203	60.24	0.0017	EQPQQNECQIQK
						1530.7	1530.66	0.0396	43.2	0.0053	EQPQQNECQIQK
						1585.79	1585.78	0.0168	41.77	0.0013	FYLAGNQEQEFLK
						1585.8	1585.78	0.018	56.53	0.00015	FYLAGNQEQEFLK
						1585.8	1585.78	0.0194	51.33	0.0011	FYLAGNQEQEFLK
						1585.8	1585.78	0.02	48.17	0.00079	FYLAGNQEQEFLK
						1585.8	1585.78	0.021	50	0.0014	FYLAGNQEQEFLK
						1585.8	1585.78	0.0216	42.54	0.0022	FYLAGNQEQEFLK
						1585.8	1585.78	0.0218	68.9	9.6e-06	FYLAGNQEQEFLK
						1585.8	1585.78	0.0218	41.82	0.004	FYLAGNQEQEFLK
						1586.79	1586.76	0.0244	49.21	0.0012	FYLAGNQEQEFLK
						1586.79	1586.76	0.0298	32.91	0.028	FYLAGNQEQEFLK
						1586.79	1586.76	0.0322	31.88	0.03	FYLAGNQEQEFLK
						1637.88	1637.88	0.0054	48.11	0.00095	ALPEEVIQHTFNLK
						1637.88	1637.88	0.006	33.35	0.013	ALPEEVIQHTFNLK
						1637.88	1637.88	0.006	48.83	0.00058	ALPEEVIQHTFNLK
						1637.9	1637.88	0.0272	94.87	1.1e-07	ALPEEVIQHTFNLK
						1637.91	1637.88	0.0278	90.07	3.1e-07	ALPEEVIQHTFNLK
						1637.91	1637.88	0.0328	80.48	1.4e-06	ALPEEVIQHTFNLK
						1642.82	1642.8	0.0228	68.73	2e-05	"FYLAGNQEQEFLK
						1642.82	1642.8	0.0258	45.92	0.0017	"FYLAGNQEQEFLK
						1642.83	1642.8	0.0266	53.62	0.00041	"FYLAGNQEQEFLK
						1741.86	1741.88	-0.0153	109.17	2.2e-07	RFYLAGNQEQEFLK
						1741.87	1741.88	-0.0115	91.68	3.2e-06	RFYLAGNQEQEFLK
						1741.87	1741.88	-0.0113	91.3	2.1e-06	RFYLAGNQEQEFLK
						1741.88	1741.88	0.0062	29.96	0.047	RFYLAGNQEQEFLK
						1741.89	1741.88	0.0107	31.55	0.027	RFYLAGNQEQEFLK
						1741.89	1741.88	0.0123	93.52	5.2e-06	RFYLAGNQEQEFLK
						1741.9	1741.88	0.0169	49.37	0.0098	RFYLAGNQEQEFLK
						1741.9	1741.88	0.0169	41.15	0.007	RFYLAGNQEQEFLK
						1741.9	1741.88	0.0173	66.11	0.00013	RFYLAGNQEQEFLK
						1741.9	1741.88	0.0183	63.37	0.00033	RFYLAGNQEQEFLK
						1741.9	1741.88	0.0235	61.36	0.0051	RFYLAGNQEQEFLK
						1741.91	1742.86	-0.9573	84.84	6.1e-05	RFYLAGNQEQEFLK
						1741.91	1741.88	0.0279	57.18	0.013	RFYLAGNQEQEFLK
						1741.91	1741.88	0.0341	93.9	2.6e-06	RFYLAGNQEQEFLK
						1741.91	1741.88	0.0343	99.21	4.4e-07	RFYLAGNQEQEFLK
						1741.91	1742.86	-0.9491	89.79	2e-05	RFYLAGNQEQEFLK
						1742.88	1742.86	0.0201	84.84	3.7e-06	RFYLAGNQEQEFLK
						1742.88	1742.86	0.0211	89.79	9.3e-07	RFYLAGNQEQEFLK
						1771.88	1771.83	0.0521	67.13	0.0036	SREQPQQNECQIQK
						1771.88	1771.83	0.0563	63.35	0.0085	SREQPQQNECQIQK
						1798.93	1798.9	0.0289	94.9	6e-06	"RFYLAGNQEQEFLK
						1798.93	1798.9	0.0335	94.77	6.1e-06	"RFYLAGNQEQEFLK
						1798.94	1798.9	0.0355	91.68	5.5e-06	"RFYLAGNQEQEFLK
						1834.89	1833.96	0.9314	29.16	0.02	"VTTATSLDFPALSWLR
						1899.93	1899.95	-0.027	99.37	2e-08	NLQGENEGEDKGAIVTVK
						1899.93	1899.95	-0.0222	99.41	2e-08	NLQGENEGEDKGAIVTVK
						1899.95	1899.95	-0.0065	143.66	3.8e-11	NLQGENEGEDKGAIVTVK
						1899.95	1899.95	-0.0045	154.97	5.8e-12	NLQGENEGEDKGAIVTVK
						1899.95	1899.95	-0.0006	97.97	2.7e-08	NLQGENEGEDKGAIVTVK
						1899.96	1899.95	0.0087	52.26	0.00032	NLQGENEGEDKGAIVTVK
						1899.96	1899.95	0.0111	53.31	0.00038	NLQGENEGEDKGAIVTVK
						1899.99	1899.95	0.0331	152.55	9.3e-12	NLQGENEGEDKGAIVTVK
						1977.99	1978.97	-0.9884	58.93	0.023	RPSYTNGPQEIYIQQGK
						1978.01	1978.97	-0.9608	93.21	8.6e-06	RPSYTNGPQEIYIQQGK
						1978.02	1978.97	-0.9572	97.85	3e-06	RPSYTNGPQEIYIQQGK
						1978.02	1977.99	0.0324	110.94	3.8e-09	RPSYTNGPQEIYIQQGK
						1978.02	1977.99	0.034	100.88	3.3e-08	RPSYTNGPQEIYIQQGK
						1978.03	1977.99	0.0428	105.56	1.7e-08	RPSYTNGPQEIYIQQGK
						1978.96	1978.97	-0.0182	58.93	0.023	RPSYTNGPQEIYIQQGK
						1978.98	1978.97	0.001	93.21	8.6e-06	RPSYTNGPQEIYIQQGK
						1978.98	1978.97	0.0022	97.85	3e-06	RPSYTNGPQEIYIQQGK
						1978.98	1978.97	0.0022	59.45	0.02	RPSYTNGPQEIYIQQGK
						1978.98	1978.97	0.0042	88.38	1.6e-05	RPSYTNGPQEIYIQQGK
						1978.98	1978.97	0.0067	62.75	0.0096	RPSYTNGPQEIYIQQGK
						1980.98	1980.94	0.0368	54.31	0.00038	RPSYTNGPQEIYIQQGK
						1980.98	1980.94	0.0392	49.91	0.00023	RPSYTNGPQEIYIQQGK
						2065.13	2066.1	-0.9773	62.32	0.01	SLLNALPEEVIQHTFNLK
						2065.13	2065.12	0.0067	75.13	3.4e-06	SLLNALPEEVIQHTFNLK
						2065.13	2066.1	-0.9746	63.13	0.0087	SLLNALPEEVIQHTFNLK
						2065.13	2065.12	0.0131	52.63	0.00073	SLLNALPEEVIQHTFNLK
						2065.14	2065.12	0.0143	33.73	0.045	SLLNALPEEVIQHTFNLK
						2065.14	2065.12	0.0147	35.96	0.012	SLLNALPEEVIQHTFNLK
						2065.14	2065.12	0.0217	53.93	9e-05	SLLNALPEEVIQHTFNLK
						2161.01	2160.99	0.0234	116.83	1.4e-10	IYPGCPSTFEEPQQPQQR
						2161.01	2160.99	0.024	97.16	1.2e-08	IYPGCPSTFEEPQQPQQR
						2161.02	2160.99	0.0308	96.23	4.1e-08	IYPGCPSTFEEPQQPQQR
						2217.12	2217.14	-0.0233	52.15	0.00032	PQAGSVTTATSLDFPALSWLR
						2491.23	2492.23	-0.9921	94.84	5.3e-06	NAMFVPHYNLNANSIIYALNGR
						2491.24	2491.24	0.0018	83.97	2.5e-07	NAMFVPHYNLNANSIIYALNGR
						2491.25	2492.23	-0.9795	75.69	0.00043	NAMFVPHYNLNANSIIYALNGR
						2491.25	2491.24	0.0096	58.99	3.6e-05	NAMFVPHYNLNANSIIYALNGR
						2491.26	2491.24	0.0132	90.43	1.9e-07	NAMFVPHYNLNANSIIYALNGR
						2492.24	2493.21	-0.9756	105.43	4.6e-07	NAMFVPHYNLNANSIIYALNGR
						2492.24	2492.23	0.0096	92.11	4.8e-06	NAMFVPHYNLNANSIIYALNGR
						2492.24	2492.23	0.0162	98.98	1.6e-08	NAMFVPHYNLNANSIIYALNGR
						2492.25	2492.23	0.0204	94.84	4.3e-08	NAMFVPHYNLNANSIIYALNGR
						2492.25	2493.21	-0.9609	62.16	0.0097	NAMFVPHYNLNANSIIYALNGR
						2492.25	2492.23	0.0255	70.47	5.8e-06	NAMFVPHYNLNANSIIYALNGR
						2492.26	2492.23	0.0318	52.23	0.0002	NAMFVPHYNLNANSIIYALNGR
						2493.22	2493.21	0.0081	105.43	4.6e-07	NAMFVPHYNLNANSIIYALNGR
						2493.23	2493.21	0.021	76.64	1e-06	NAMFVPHYNLNANSIIYALNGR
						2494.24	2494.2	0.0491	52.65	0.0082	NAMFVPHYNLNANSIIYALNGR
						2508.24	2508.22	0.0163	86.73	1.7e-06	NAMFVPHYNLNANSIIYALNGR
						2548.28	2548.26	0.0205	25.26	0.024	"NAMFVPHYNLNANSIIYALNGR
						2548.29	2548.26	0.0232	50.07	0.00036	"NAMFVPHYNLNANSIIYALNGR
						2549.27	2549.25	0.0199	41.15	0.019	"NAMFVPHYNLNANSIIYALNGR
						2620.33	2620.32	0.0062	88.15	1.3e-07	KNAMFVPHYNLNANSIIYALNGR
						2620.34	2620.32	0.0167	73.56	3.4e-06	KNAMFVPHYNLNANSIIYALNGR
						2666.21	2666.23	-0.0111	72.24	1.7e-06	GIFGMIYPGCPSTFEEPQQPQQR
						2666.23	2666.23	0.003	76.59	4.6e-07	GIFGMIYPGCPSTFEEPQQPQQR
						2666.23	2666.23	0.0051	90.27	6.3e-08	GIFGMIYPGCPSTFEEPQQPQQR
						2666.25	2666.23	0.0246	95.31	1.1e-08	GIFGMIYPGCPSTFEEPQQPQQR
						2666.25	2666.23	0.0258	89.63	3.4e-08	GIFGMIYPGCPSTFEEPQQPQQR
						2666.26	2666.23	0.0366	75.38	4.9e-07	GIFGMIYPGCPSTFEEPQQPQQR
						2682.25	2682.22	0.0305	52.9	0.00021	GIFGMIYPGCPSTFEEPQQPQQR
						2682.25	2682.22	0.0311	42.59	0.0018	GIFGMIYPGCPSTFEEPQQPQQR
						2682.26	2682.22	0.0398	49.56	0.00035	GIFGMIYPGCPSTFEEPQQPQQR
						2723.26	2723.25	0.0098	27.16	0.015	"GIFGMIYPGCPSTFEEPQQPQQR
						2723.26	2723.25	0.0134	75.44	2e-06	"GIFGMIYPGCPSTFEEPQQPQQR
						2723.27	2723.25	0.0179	72.4	2e-06	"GIFGMIYPGCPSTFEEPQQPQQR
						2723.27	2723.25	0.023	70.77	3.2e-06	"GIFGMIYPGCPSTFEEPQQPQQR
						2723.27	2723.25	0.0266	33.83	0.0038	"GIFGMIYPGCPSTFEEPQQPQQR
						2723.28	2723.25	0.0332	40.88	0.00089	"GIFGMIYPGCPSTFEEPQQPQQR
						2723.3	2723.25	0.0488	48.12	0.00032	"GIFGMIYPGCPSTFEEPQQPQQR
						2723.3	2723.25	0.0533	39.27	0.0013	"GIFGMIYPGCPSTFEEPQQPQQR
						2986.44	2986.46	-0.0197	38.4	0.015	IESEGGLIETWNPNNKPFQCAGVALSR
						2986.45	2987.44	-0.9926	47.86	0.036	IESEGGLIETWNPNNKPFQCAGVALSR
						2986.46	2986.46	0.0028	73.95	1.2e-06	IESEGGLIETWNPNNKPFQCAGVALSR
						2986.47	2986.46	0.0058	143.13	4e-12	IESEGGLIETWNPNNKPFQCAGVALSR
						2986.47	2986.46	0.0115	165.91	8.5e-15	IESEGGLIETWNPNNKPFQCAGVALSR
						2986.47	2986.46	0.0115	98.77	5.9e-09	IESEGGLIETWNPNNKPFQCAGVALSR
						2986.48	2986.46	0.0145	136.12	2.9e-12	IESEGGLIETWNPNNKPFQCAGVALSR
						2986.48	2986.46	0.0151	108.28	1.4e-09	IESEGGLIETWNPNNKPFQCAGVALSR
						2986.48	2986.46	0.0157	97.09	6.4e-08	IESEGGLIETWNPNNKPFQCAGVALSR
						2986.48	2986.46	0.0169	125.27	2.3e-10	IESEGGLIETWNPNNKPFQCAGVALSR
						2986.48	2986.46	0.0175	90.48	1.1e-07	IESEGGLIETWNPNNKPFQCAGVALSR
						2986.48	2986.46	0.0184	90.68	4.5e-08	IESEGGLIETWNPNNKPFQCAGVALSR
						2986.48	2986.46	0.0196	138.88	4.6e-12	IESEGGLIETWNPNNKPFQCAGVALSR
						2986.48	2986.46	0.0217	210.6	1.2e-17	IESEGGLIETWNPNNKPFQCAGVALSR
						2986.49	2986.46	0.0247	125.89	3e-11	IESEGGLIETWNPNNKPFQCAGVALSR
						2986.49	2986.46	0.0328	214.25	5.2e-18	IESEGGLIETWNPNNKPFQCAGVALSR
						2986.5	2986.46	0.035	33.4	0.018	IESEGGLIETWNPNNKPFQCAGVALSR
						2986.5	2986.46	0.0382	46.39	0.0013	IESEGGLIETWNPNNKPFQCAGVALSR
						2986.51	2986.46	0.0448	214.45	4e-18	IESEGGLIETWNPNNKPFQCAGVALSR
						2989.5	2989.41	0.0868	31.48	0.05	IESEGGLIETWNPNNKPFQCAGVALSR
						2989.51	2989.41	0.0928	31.68	0.046	IESEGGLIETWNPNNKPFQCAGVALSR
						3043.51	3043.48	0.0263	33.05	0.0094	"IESEGGLIETWNPNNKPFQCAGVALSR
						3091.6	3091.64	-0.0397	80.19	1.9e-06	TPMIGTLAGANSLLNALPEEVIQHTFNLK
						3091.62	3091.64	-0.0223	54.02	0.00064	TPMIGTLAGANSLLNALPEEVIQHTFNLK
						3174.53	3174.51	0.0193	120.17	5.9e-09	YNNEDTPVVAVSIIDTNSLENQLDQMPR
						3420.79	3421.76	-0.9613	205.86	2.4e-18	TNDTPMIGTLAGANSLLNALPEEVIQHTFNLK
						3421.68	3421.76	-0.0757	205.86	2.4e-18	TNDTPMIGTLAGANSLLNALPEEVIQHTFNLK
						3421.71	3421.76	-0.0433	57.43	0.00091	TNDTPMIGTLAGANSLLNALPEEVIQHTFNLK
						3421.75	3421.76	-0.0094	233.64	5.9e-21	TNDTPMIGTLAGANSLLNALPEEVIQHTFNLK
						3421.76	3421.76	0.0044	90.49	2.8e-07	TNDTPMIGTLAGANSLLNALPEEVIQHTFNLK
						3421.77	3421.76	0.017	141.28	3.4e-12	TNDTPMIGTLAGANSLLNALPEEVIQHTFNLK
						3421.77	3421.76	0.019	103.13	1.9e-08	TNDTPMIGTLAGANSLLNALPEEVIQHTFNLK
						3421.78	3421.76	0.0218	132.71	5.5e-12	TNDTPMIGTLAGANSLLNALPEEVIQHTFNLK
						3421.78	3421.76	0.0226	98.72	1.8e-07	TNDTPMIGTLAGANSLLNALPEEVIQHTFNLK
						3421.78	3421.76	0.0245	195.14	3.3e-17	TNDTPMIGTLAGANSLLNALPEEVIQHTFNLK
						3422.74	3422.74	-0.0004	135.96	3e-10	TNDTPMIGTLAGANSLLNALPEEVIQHTFNLK
						3422.75	3422.74	0.008	92.29	7e-06	TNDTPMIGTLAGANSLLNALPEEVIQHTFNLK
						3422.75	3422.74	0.0113	112.05	7.4e-08	TNDTPMIGTLAGANSLLNALPEEVIQHTFNLK
						3422.75	3422.74	0.0116	78.8	0.00016	TNDTPMIGTLAGANSLLNALPEEVIQHTFNLK
						3422.75	3422.74	0.0131	71.47	0.00084	TNDTPMIGTLAGANSLLNALPEEVIQHTFNLK
						3423.73	3422.74	0.9884	71.47	1.3e-05	TNDTPMIGTLAGANSLLNALPEEVIQHTFNLK
						3424.8	3424.71	0.0893	39.65	0.00081	TNDTPMIGTLAGANSLLNALPEEVIQHTFNLK
						3424.8	3424.71	0.0968	36.66	0.0022	TNDTPMIGTLAGANSLLNALPEEVIQHTFNLK
						3437.76	3437.75	0.0104	83.7	3.4e-06	TNDTPMIGTLAGANSLLNALPEEVIQHTFNLK
						3437.76	3437.75	0.0144	94.79	3.9e-08	TNDTPMIGTLAGANSLLNALPEEVIQHTFNLK
						3438.75	3438.73	0.0196	69.37	2.7e-05	TNDTPMIGTLAGANSLLNALPEEVIQHTFNLK
						3438.76	3438.73	0.0262	90.9	3.1e-08	TNDTPMIGTLAGANSLLNALPEEVIQHTFNLK
						3478.79	3478.78	0.0142	37.76	0.0023	"TNDTPMIGTLAGANSLLNALPEEVIQHTFNLK
						3478.79	3478.78	0.0163	102.25	5.7e-09	"TNDTPMIGTLAGANSLLNALPEEVIQHTFNLK
						3478.8	3478.78	0.022	50.49	0.0001	"TNDTPMIGTLAGANSLLNALPEEVIQHTFNLK
						3478.8	3478.78	0.0256	172.29	6.2e-15	"TNDTPMIGTLAGANSLLNALPEEVIQHTFNLK
						3478.8	3478.78	0.0263	83.34	1.4e-07	"TNDTPMIGTLAGANSLLNALPEEVIQHTFNLK
						3478.8	3478.78	0.0274	75.58	3.3e-05	"TNDTPMIGTLAGANSLLNALPEEVIQHTFNLK
						3478.81	3478.78	0.0313	73.74	5.4e-07	"TNDTPMIGTLAGANSLLNALPEEVIQHTFNLK
						3478.81	3478.78	0.0323	83.22	1.4e-07	"TNDTPMIGTLAGANSLLNALPEEVIQHTFNLK
						3478.81	3478.78	0.0343	80.39	2.3e-07	"TNDTPMIGTLAGANSLLNALPEEVIQHTFNLK
						3478.82	3478.78	0.0419	94.02	1.2e-08	"TNDTPMIGTLAGANSLLNALPEEVIQHTFNLK
						3478.83	3478.78	0.0511	83	1.8e-07	"TNDTPMIGTLAGANSLLNALPEEVIQHTFNLK
						3479.8	3479.76	0.0355	36.93	0.0021	"TNDTPMIGTLAGANSLLNALPEEVIQHTFNLK
						3643.78	3643.79	-0.0095	40.44	0.0039	HNIGQTSSPDIYNPQAGSVTTATSLDFPALSWLR
						3643.79	3643.79	-0.0008	119.3	6.7e-11	HNIGQTSSPDIYNPQAGSVTTATSLDFPALSWLR
						3643.79	3644.77	-0.9824	66.32	0.0025	HNIGQTSSPDIYNPQAGSVTTATSLDFPALSWLR
						3643.79	3644.77	-0.98	70.13	0.001	HNIGQTSSPDIYNPQAGSVTTATSLDFPALSWLR
						3643.8	3643.79	0.0058	60.64	0.00026	HNIGQTSSPDIYNPQAGSVTTATSLDFPALSWLR
						3643.8	3643.79	0.0067	113.38	1.1e-09	HNIGQTSSPDIYNPQAGSVTTATSLDFPALSWLR
						3643.81	3643.79	0.0187	133.56	2.5e-12	HNIGQTSSPDIYNPQAGSVTTATSLDFPALSWLR
						3643.81	3643.79	0.0226	117.92	2.2e-10	HNIGQTSSPDIYNPQAGSVTTATSLDFPALSWLR
						3643.82	3643.79	0.025	145.06	7.5e-13	HNIGQTSSPDIYNPQAGSVTTATSLDFPALSWLR
						3643.82	3643.79	0.0256	145.44	7e-13	HNIGQTSSPDIYNPQAGSVTTATSLDFPALSWLR
						3643.82	3643.79	0.0295	131.27	1.3e-11	HNIGQTSSPDIYNPQAGSVTTATSLDFPALSWLR
						3765.75	3765.73	0.0221	68.19	5.4e-06	GGLSVIKPPTDEQQQRPQEEEEEEEDEKPQCK
						3765.76	3765.73	0.0322	39.52	0.012	GGLSVIKPPTDEQQQRPQEEEEEEEDEKPQCK
						3765.76	3765.73	0.0328	37.76	0.012	GGLSVIKPPTDEQQQRPQEEEEEEEDEKPQCK
						3765.76	3765.73	0.0361	36.22	0.019	GGLSVIKPPTDEQQQRPQEEEEEEEDEKPQCK
						3765.78	3765.73	0.0486	59.1	6.8e-05	GGLSVIKPPTDEQQQRPQEEEEEEEDEKPQCK
						3765.78	3765.73	0.0546	57.19	0.00019	GGLSVIKPPTDEQQQRPQEEEEEEEDEKPQCK
	3	P02858	Glycinin G4	8621	64215	820.412	820.411	0.0007	44.15	0.0084	CAGVTVSK
						820.413	820.411	0.0015	43.17	0.0067	CAGVTVSK
						1093.51	1093.52	-0.0008	38.16	0.038	*QQLQDSHQK
						1093.52	1093.52	0.0042	39.63	0.013	*QQLQDSHQK
						1269.64	1269.65	-0.0084	30.74	0.025	THHNAVTSYLK
						1269.64	1269.65	-0.0039	43.04	0.0019	THHNAVTSYLK
						1269.65	1269.65	0.0045	67.69	5e-05	THHNAVTSYLK
						1269.66	1269.65	0.0123	73.95	1.2e-05	THHNAVTSYLK
						1269.66	1269.65	0.0171	69.4	3.5e-05	THHNAVTSYLK
						1384.69	1384.71	-0.0217	50.33	0.0026	PSEVLAHSYNLR
						1384.7	1384.71	-0.0067	61.59	0.00013	PSEVLAHSYNLR
						1384.71	1384.71	-0.0013	52.68	0.001	PSEVLAHSYNLR
						1384.72	1384.71	0.0148	81.12	9.1e-06	PSEVLAHSYNLR
						1384.74	1384.71	0.026	85.69	7.1e-06	PSEVLAHSYNLR
						1384.74	1384.71	0.032	89.59	6.4e-06	PSEVLAHSYNLR
						1397.8	1397.82	-0.0231	74.62	1.6e-05	ISTLNSLTLPALR
						1397.8	1397.82	-0.0211	75.43	1.3e-05	ISTLNSLTLPALR
						1397.81	1397.82	-0.0139	67.22	8.2e-05	ISTLNSLTLPALR
						1397.82	1397.82	-0.0037	70.93	0.00023	ISTLNSLTLPALR
						1397.83	1397.82	0.0023	72.69	1.6e-05	ISTLNSLTLPALR
						1397.84	1397.82	0.0147	75.68	1.5e-05	ISTLNSLTLPALR
						1454.86	1454.85	0.0166	63.28	0.00024	"ISTLNSLTLPALR
						1499.76	1499.75	0.0101	31.17	0.042	NGLHLPSYSPYPR
						1499.76	1499.75	0.0113	34.09	0.013	NGLHLPSYSPYPR
						1499.77	1499.75	0.0146	37	0.0096	NGLHLPSYSPYPR
						1499.78	1499.75	0.029	36.63	0.027	NGLHLPSYSPYPR
						1499.78	1499.75	0.0312	32.71	0.05	NGLHLPSYSPYPR
						1500.76	1500.74	0.0267	61.9	0.00035	NGLHLPSYSPYPR
						1500.76	1500.74	0.0271	56.95	0.0016	NGLHLPSYSPYPR
						1500.77	1500.74	0.0297	51.38	0.0021	NGLHLPSYSPYPR
						1508.84	1508.85	-0.0004	70.37	0.00099	*QIVTVEGGLSVISPK
						1508.85	1508.85	0.0018	54.41	0.00063	*QIVTVEGGLSVISPK
						1508.85	1508.85	0.0052	70.62	0.00026	*QIVTVEGGLSVISPK
						1508.85	1508.85	0.0054	47.42	0.014	*QIVTVEGGLSVISPK
						1508.85	1508.85	0.0062	70.2	0.00014	*QIVTVEGGLSVISPK
						1508.85	1508.85	0.0072	49.3	0.0013	*QIVTVEGGLSVISPK
						1508.85	1508.85	0.0084	66.1	5.3e-05	*QIVTVEGGLSVISPK
						1508.85	1508.85	0.0096	90.69	3.4e-06	*QIVTVEGGLSVISPK
						1508.86	1508.85	0.0106	92.86	5.8e-06	*QIVTVEGGLSVISPK
						1508.86	1508.85	0.0106	109.12	1.4e-07	*QIVTVEGGLSVISPK
						1508.86	1508.85	0.0114	56.33	0.0013	*QIVTVEGGLSVISPK
						1508.86	1508.85	0.0118	62.2	0.0052	*QIVTVEGGLSVISPK
						1508.86	1508.85	0.0118	94.55	4e-07	*QIVTVEGGLSVISPK
						1508.86	1508.85	0.013	76.68	0.00011	*QIVTVEGGLSVISPK
						1508.86	1508.85	0.0146	64.37	0.00014	*QIVTVEGGLSVISPK
						1508.86	1508.85	0.0148	80.44	7.7e-06	*QIVTVEGGLSVISPK
						1525.88	1525.87	0.0051	59.68	0.00092	QIVTVEGGLSVISPK
						1525.88	1525.87	0.0061	81.43	2.2e-06	QIVTVEGGLSVISPK
						1525.88	1525.87	0.0065	98.86	2.6e-07	QIVTVEGGLSVISPK
						1525.88	1525.87	0.0087	86	2.3e-06	QIVTVEGGLSVISPK
						1525.88	1525.87	0.0089	72.75	5.8e-05	QIVTVEGGLSVISPK
						1525.88	1525.87	0.0089	71.2	5.2e-05	QIVTVEGGLSVISPK
						1525.88	1525.87	0.0095	80.68	2e-05	QIVTVEGGLSVISPK
						1525.88	1525.87	0.0097	83.93	2.2e-06	QIVTVEGGLSVISPK
						1525.88	1525.87	0.0101	77.86	1.8e-05	QIVTVEGGLSVISPK
						1525.88	1525.87	0.0101	55.87	0.0015	QIVTVEGGLSVISPK
						1525.88	1525.87	0.0103	79.3	1.4e-05	QIVTVEGGLSVISPK
						1525.88	1525.87	0.0107	61.16	0.0012	QIVTVEGGLSVISPK
						1525.88	1525.87	0.0107	92.44	5.5e-07	QIVTVEGGLSVISPK
						1525.88	1525.87	0.0109	75.37	5.1e-05	QIVTVEGGLSVISPK
						1525.88	1525.87	0.0113	63.44	0.00053	QIVTVEGGLSVISPK
						1525.88	1525.87	0.0135	59.74	0.00016	QIVTVEGGLSVISPK
						1525.89	1525.87	0.0137	89.15	1.2e-06	QIVTVEGGLSVISPK
						1525.89	1525.87	0.0141	48.26	0.046	QIVTVEGGLSVISPK
						1525.89	1525.87	0.0151	48.25	0.0049	QIVTVEGGLSVISPK
						1525.89	1525.87	0.0153	76.23	1.8e-05	QIVTVEGGLSVISPK
						1525.89	1525.87	0.0153	82.42	4.8e-06	QIVTVEGGLSVISPK
						1525.89	1525.87	0.0155	74.21	2.6e-05	QIVTVEGGLSVISPK
						1525.89	1525.87	0.0157	77.1	1.4e-05	QIVTVEGGLSVISPK
						1525.89	1525.87	0.0163	92.3	1e-06	QIVTVEGGLSVISPK
						1525.89	1525.87	0.0163	97.07	2.1e-07	QIVTVEGGLSVISPK
						1525.89	1525.87	0.0167	81.92	5.5e-06	QIVTVEGGLSVISPK
						1525.89	1525.87	0.0167	92.36	5.4e-07	QIVTVEGGLSVISPK
						1525.89	1525.87	0.0173	81.01	3.3e-05	QIVTVEGGLSVISPK
						1525.89	1525.87	0.0175	85.75	2.3e-06	QIVTVEGGLSVISPK
						1525.89	1525.87	0.0183	86.99	1.7e-06	QIVTVEGGLSVISPK
						1525.89	1525.87	0.0185	71.96	1.9e-05	QIVTVEGGLSVISPK
						1525.89	1525.87	0.0189	61.76	0.00015	QIVTVEGGLSVISPK
						1525.89	1525.87	0.0199	68.22	6.7e-05	QIVTVEGGLSVISPK
						1525.89	1525.87	0.0217	76.22	1.6e-05	QIVTVEGGLSVISPK
						1525.89	1525.87	0.0219	67.31	8.2e-05	QIVTVEGGLSVISPK
						1525.89	1525.87	0.0229	77.77	6.5e-06	QIVTVEGGLSVISPK
						1525.89	1525.87	0.0235	91.09	1.3e-06	QIVTVEGGLSVISPK
						1525.9	1525.87	0.0289	86.35	3.5e-06	QIVTVEGGLSVISPK
						1525.9	1525.87	0.0289	81.01	4.8e-06	QIVTVEGGLSVISPK
						1525.9	1525.87	0.0325	36.43	0.0068	QIVTVEGGLSVISPK
						1525.91	1525.87	0.0339	84.96	1.6e-06	QIVTVEGGLSVISPK
						1568.84	1568.83	0.0088	54.77	0.00062	AIPSEVLAHSYNLR
						1568.84	1568.83	0.0112	70.46	2e-05	AIPSEVLAHSYNLR
						1568.85	1568.83	0.0142	115.86	5.2e-09	AIPSEVLAHSYNLR
						1568.85	1568.83	0.0208	101	1.7e-08	AIPSEVLAHSYNLR
						1568.85	1568.83	0.0214	74.04	9.3e-06	AIPSEVLAHSYNLR
						1568.86	1568.83	0.0338	113.04	9.4e-09	AIPSEVLAHSYNLR
						1653.97	1653.97	0.0026	54.87	0.0015	KQIVTVEGGLSVISPK
						1653.97	1653.97	0.0044	59.76	0.0021	KQIVTVEGGLSVISPK
						1653.97	1653.97	0.0074	72.58	0.00037	KQIVTVEGGLSVISPK
						1653.97	1653.97	0.0076	50.15	0.0095	KQIVTVEGGLSVISPK
						1653.97	1653.97	0.008	47.51	0.029	KQIVTVEGGLSVISPK
						1653.98	1653.97	0.0088	42.3	0.03	KQIVTVEGGLSVISPK
						1653.98	1653.97	0.01	71.67	0.00081	KQIVTVEGGLSVISPK
						1653.98	1653.97	0.01	56	0.0029	KQIVTVEGGLSVISPK
						1653.98	1653.97	0.0104	57.63	0.0017	KQIVTVEGGLSVISPK
						1653.98	1653.97	0.0104	51.47	0.0034	KQIVTVEGGLSVISPK
						1653.98	1653.97	0.0104	59.75	0.0012	KQIVTVEGGLSVISPK
						1653.98	1653.97	0.011	78.64	2.2e-05	KQIVTVEGGLSVISPK
						1653.98	1653.97	0.011	66.6	0.00077	KQIVTVEGGLSVISPK
						1653.98	1653.97	0.0112	75.72	0.00018	KQIVTVEGGLSVISPK
						1653.98	1653.97	0.0118	57.81	0.00086	KQIVTVEGGLSVISPK
						1653.98	1653.97	0.0121	48.06	0.0042	KQIVTVEGGLSVISPK
						1653.98	1653.97	0.0122	73.12	0.00013	KQIVTVEGGLSVISPK
						1653.98	1653.97	0.0128	82.3	9.3e-06	KQIVTVEGGLSVISPK
						1653.98	1653.97	0.0137	70.94	8.3e-05	KQIVTVEGGLSVISPK
						1653.98	1653.97	0.014	78.6	9.1e-05	KQIVTVEGGLSVISPK
						1653.98	1653.97	0.0142	54.47	0.00089	KQIVTVEGGLSVISPK
						1653.98	1653.97	0.0146	56.5	0.0017	KQIVTVEGGLSVISPK
						1653.98	1653.97	0.0146	54.65	0.00062	KQIVTVEGGLSVISPK
						1653.98	1653.97	0.0147	42.79	0.0096	KQIVTVEGGLSVISPK
						1653.98	1653.97	0.0147	59.1	0.00029	KQIVTVEGGLSVISPK
						1653.98	1653.97	0.0153	73.17	0.00034	KQIVTVEGGLSVISPK
						1653.98	1653.97	0.0157	100.21	1.8e-06	KQIVTVEGGLSVISPK
						1653.98	1653.97	0.0161	103.6	8.1e-07	KQIVTVEGGLSVISPK
						1653.98	1653.97	0.0161	76.53	5.8e-05	KQIVTVEGGLSVISPK
						1653.98	1653.97	0.0169	117.72	3.1e-08	KQIVTVEGGLSVISPK
						1653.99	1653.97	0.019	49.85	0.034	KQIVTVEGGLSVISPK
						1653.99	1653.97	0.0191	70.31	0.0017	KQIVTVEGGLSVISPK
						1653.99	1653.97	0.0193	58.02	0.0062	KQIVTVEGGLSVISPK
						1653.99	1653.97	0.0195	136.54	4.1e-10	KQIVTVEGGLSVISPK
						1653.99	1653.97	0.0235	39.37	0.005	KQIVTVEGGLSVISPK
						1653.99	1653.97	0.0247	78.64	5.7e-05	KQIVTVEGGLSVISPK
						1653.99	1653.97	0.0253	84.74	3.3e-05	KQIVTVEGGLSVISPK
						1653.99	1653.97	0.0257	104.32	6.9e-07	KQIVTVEGGLSVISPK
						1653.99	1653.97	0.0257	72.88	0.00014	KQIVTVEGGLSVISPK
						1653.99	1653.97	0.0279	116.72	4e-08	KQIVTVEGGLSVISPK
						1654	1653.97	0.0327	65.66	8e-05	KQIVTVEGGLSVISPK
						1654	1653.97	0.0383	60.09	0.00013	KQIVTVEGGLSVISPK
						1751.91	1751.89	0.0212	34.79	0.029	HFNEGDVLVIPPGVPY
						1862.88	1862.88	0.001	123.47	8.3e-10	HFLAQSFNTNEDIAEK
						1862.88	1862.88	0.0038	37.31	0.0095	HFLAQSFNTNEDIAEK
						1862.89	1862.88	0.008	56.16	5.7e-05	HFLAQSFNTNEDIAEK
						1862.89	1862.88	0.008	43.06	0.0071	HFLAQSFNTNEDIAEK
						1862.89	1862.88	0.0086	38.65	0.0067	HFLAQSFNTNEDIAEK
						1862.89	1862.88	0.0114	109.14	4.3e-09	HFLAQSFNTNEDIAEK
						1862.89	1862.88	0.0122	33.79	0.031	HFLAQSFNTNEDIAEK
						1862.89	1862.88	0.0144	116.27	1.3e-09	HFLAQSFNTNEDIAEK
						1862.9	1862.88	0.0154	98.12	1.4e-07	HFLAQSFNTNEDIAEK
						1862.9	1862.88	0.0162	57.87	5.7e-05	HFLAQSFNTNEDIAEK
						1862.9	1862.88	0.0166	99.83	2.7e-08	HFLAQSFNTNEDIAEK
						1862.9	1862.88	0.0168	65.59	2.6e-05	HFLAQSFNTNEDIAEK
						1862.9	1862.88	0.0172	74.19	4.6e-06	HFLAQSFNTNEDIAEK
						1862.9	1862.88	0.019	65.78	2e-05	HFLAQSFNTNEDIAEK
						1862.9	1862.88	0.019	106.56	6.5e-08	HFLAQSFNTNEDIAEK
						1862.9	1862.88	0.0197	55.63	0.0016	HFLAQSFNTNEDIAEK
						1862.9	1862.88	0.0212	70.7	6.1e-06	HFLAQSFNTNEDIAEK
						1862.9	1862.88	0.0212	34.05	0.03	HFLAQSFNTNEDIAEK
						1862.9	1862.88	0.0215	62.88	0.00054	HFLAQSFNTNEDIAEK
						1862.9	1862.88	0.0228	33.08	0.017	HFLAQSFNTNEDIAEK
						1862.9	1862.88	0.0232	62.87	2.7e-05	HFLAQSFNTNEDIAEK
						1862.9	1862.88	0.0236	51.69	0.0039	HFLAQSFNTNEDIAEK
						1862.9	1862.88	0.024	93.91	1.3e-07	HFLAQSFNTNEDIAEK
						1862.9	1862.88	0.0242	32.14	0.044	HFLAQSFNTNEDIAEK
						1862.91	1862.88	0.0278	103.5	1.3e-08	HFLAQSFNTNEDIAEK
						1862.91	1862.88	0.0288	124.33	3.4e-10	HFLAQSFNTNEDIAEK
						1862.91	1862.88	0.0304	83.39	5.3e-07	HFLAQSFNTNEDIAEK
						1862.91	1862.88	0.0306	27.73	0.032	HFLAQSFNTNEDIAEK
						1862.91	1862.88	0.0338	112.52	5.3e-09	HFLAQSFNTNEDIAEK
						1862.91	1862.88	0.0348	124.44	1.1e-09	HFLAQSFNTNEDIAEK
						1862.91	1862.88	0.035	94.32	3.2e-08	HFLAQSFNTNEDIAEK
						1862.92	1862.88	0.0362	76.56	2.1e-06	HFLAQSFNTNEDIAEK
						1862.92	1862.88	0.038	107.24	7.6e-09	HFLAQSFNTNEDIAEK
						1862.92	1862.88	0.0384	114.93	2.8e-09	HFLAQSFNTNEDIAEK
						1862.92	1862.88	0.0384	88.21	2.3e-07	HFLAQSFNTNEDIAEK
						1862.92	1862.88	0.0422	102.02	2.3e-08	HFLAQSFNTNEDIAEK
						1862.92	1862.88	0.0422	104.73	8.6e-09	HFLAQSFNTNEDIAEK
						2049.98	2049.95	0.0255	83.11	1e-06	LNECQLNNLNALEPDHR
						2049.98	2049.95	0.0257	77.52	1.4e-05	LNECQLNNLNALEPDHR
						2049.99	2049.95	0.0321	102.41	3.7e-08	LNECQLNNLNALEPDHR
						2049.99	2049.95	0.0337	61.3	0.00055	LNECQLNNLNALEPDHR
						2049.99	2049.95	0.0357	69.27	0.00014	LNECQLNNLNALEPDHR
						2049.99	2049.95	0.0375	97.25	3.5e-07	LNECQLNNLNALEPDHR
						2098.08	2098.1	-0.0154	55.82	0.0017	LTLNRNGLHLPSYSPYPR
						2098.1	2098.1	0.001	48.4	0.0047	LTLNRNGLHLPSYSPYPR
						2098.1	2098.1	0.0046	43.75	0.021	LTLNRNGLHLPSYSPYPR
						2098.1	2098.1	0.0078	56.5	0.00077	LTLNRNGLHLPSYSPYPR
						2098.11	2098.1	0.0106	57.29	0.00023	LTLNRNGLHLPSYSPYPR
						2098.12	2098.1	0.0279	74.22	4.6e-06	LTLNRNGLHLPSYSPYPR
						2098.13	2098.1	0.0313	62.86	6.4e-05	LTLNRNGLHLPSYSPYPR
						2098.13	2098.1	0.0345	72.96	8.8e-06	LTLNRNGLHLPSYSPYPR
						2099.09	2099.08	0.0099	40.91	0.048	LTLNRNGLHLPSYSPYPR
						2114.01	2113.98	0.0293	103.55	6e-09	YEGNWGPLVNPESQQGSPR
						2114.01	2113.98	0.0307	107.57	3.8e-09	YEGNWGPLVNPESQQGSPR
						2114.02	2113.98	0.0401	103.63	1.1e-08	YEGNWGPLVNPESQQGSPR
						2151.06	2151.06	0.0001	130.61	2.4e-10	VESEGGLIQTWNSQHPELK
						2151.1	2151.06	0.0378	87.67	1.6e-05	VESEGGLIQTWNSQHPELK
						2151.1	2151.06	0.0378	83.94	3.3e-05	VESEGGLIQTWNSQHPELK
						2151.1	2151.06	0.0398	92.81	3.9e-06	VESEGGLIQTWNSQHPELK
						2233.82	2233.8	0.0159	121	1e-09	EQDQDQDEDEDEDEDQPR
						2233.82	2233.8	0.0179	120.78	1.1e-09	EQDQDQDEDEDEDEDQPR
						2233.82	2233.8	0.0211	120.84	1.1e-09	EQDQDQDEDEDEDEDQPR
						2271.98	2271.99	-0.008	136.08	9.9e-12	*QGQHQQEEEEEGGSVLSGFSK
						2271.99	2271.99	-0.0022	137.34	1.1e-11	*QGQHQQEEEEEGGSVLSGFSK
						2271.99	2271.99	0	135.87	1.5e-11	*QGQHQQEEEEEGGSVLSGFSK
						2272.02	2271.99	0.0354	84.47	5.1e-07	*QGQHQQEEEEEGGSVLSGFSK
						2289.03	2289.01	0.0197	118.85	2.2e-08	QGQHQQEEEEEGGSVLSGFSK
						2289.04	2289.01	0.0218	85.67	4.6e-05	QGQHQQEEEEEGGSVLSGFSK
						2289.04	2289.01	0.0233	81.86	0.00011	QGQHQQEEEEEGGSVLSGFSK
						2289.04	2289.01	0.0259	119.95	1.7e-08	QGQHQQEEEEEGGSVLSGFSK
						2289.05	2289.01	0.0356	91.16	1.3e-05	QGQHQQEEEEEGGSVLSGFSK
						2289.05	2289.01	0.0387	122.04	1e-08	QGQHQQEEEEEGGSVLSGFSK
						2318.16	2318.14	0.0166	70.1	6.8e-06	NGIYSPHWNLNANSVIYVTR
						2318.16	2318.14	0.0196	90.39	6.9e-08	NGIYSPHWNLNANSVIYVTR
						2361.91	2361.9	0.012	97.36	9.6e-08	EQDQDQDEDEDEDEDQPRK
						2361.91	2361.9	0.0148	70.01	2.4e-05	EQDQDQDEDEDEDEDQPRK
						2361.91	2361.9	0.0165	89.18	3e-07	EQDQDQDEDEDEDEDQPRK
						2361.92	2361.9	0.0204	55.95	0.0013	EQDQDQDEDEDEDEDQPRK
						2485.19	2485.15	0.0328	37.38	0.012	"ALGVAIPGCPETFEEPQEQSNR
						2585.1	2585.11	-0.0064	78.15	8.8e-06	EQDEDEDEDEDKPRPSRPSQGK
						2585.11	2585.11	0.0033	53.1	0.00032	EQDEDEDEDEDKPRPSRPSQGK
						2585.12	2585.11	0.0098	33.17	0.021	EQDEDEDEDEDKPRPSRPSQGK
						2585.12	2585.11	0.0103	91.2	7e-07	EQDEDEDEDEDKPRPSRPSQGK
						2585.13	2585.11	0.0144	84.46	1.3e-06	EQDEDEDEDEDKPRPSRPSQGK
						2585.13	2585.11	0.0181	94.34	4.8e-07	EQDEDEDEDEDKPRPSRPSQGK
						2585.13	2585.11	0.0199	79.72	5e-06	EQDEDEDEDEDKPRPSRPSQGK
						2754.31	2754.3	0.0093	68.66	5.8e-06	VFYLAGNPDIEYPETMQQQQQQK
						2754.32	2754.3	0.0192	65.97	1.1e-05	VFYLAGNPDIEYPETMQQQQQQK
						2754.35	2754.3	0.0516	66.22	8.6e-06	VFYLAGNPDIEYPETMQQQQQQK
						2770.33	2770.29	0.0418	48.86	0.00038	VFYLAGNPDIEYPETMQQQQQQK
						2770.34	2770.29	0.046	61.82	1.1e-05	VFYLAGNPDIEYPETMQQQQQQK
						2770.34	2770.29	0.0517	40.34	0.0018	VFYLAGNPDIEYPETMQQQQQQK
						2811.32	2811.32	0.0037	52.48	0.00024	"VFYLAGNPDIEYPETMQQQQQQK
						2811.33	2811.32	0.0157	77.24	1.7e-06	"VFYLAGNPDIEYPETMQQQQQQK
						2811.34	2811.32	0.0199	57.21	4.1e-05	"VFYLAGNPDIEYPETMQQQQQQK
						2954.43	2954.44	-0.0151	72.46	0.00079	VESEGGLIQTWNSQHPELKCAGVTVSK
						2955.43	2955.43	0.0028	108.67	1.9e-07	VESEGGLIQTWNSQHPELKCAGVTVSK
						2955.43	2955.43	0.0028	90.65	1.2e-05	VESEGGLIQTWNSQHPELKCAGVTVSK
						2955.43	2955.43	0.0031	94.22	5.3e-06	VESEGGLIQTWNSQHPELKCAGVTVSK
						3209.25	3209.25	0.0074	138.32	9.2e-12	WQEQQDEDEDEDEDDEDEQIPSHPPR
						3209.29	3209.25	0.0452	206.59	8.9e-18	WQEQQDEDEDEDEDDEDEQIPSHPPR
						3209.29	3209.25	0.0455	175.9	6.4e-15	WQEQQDEDEDEDEDDEDEQIPSHPPR
						3209.29	3209.25	0.0488	176.29	6.2e-15	WQEQQDEDEDEDEDDEDEQIPSHPPR
						4182.04	4183	-0.9677	41.67	0.0023	LNECQLNNLNALEPDHRVESEGGLIQTWNSQHPELK
						4182.04	4183	-0.9662	39.49	0.0067	LNECQLNNLNALEPDHRVESEGGLIQTWNSQHPELK
						4182.04	4182.02	0.0206	47.85	0.00078	LNECQLNNLNALEPDHRVESEGGLIQTWNSQHPELK
	4	P11828	Glycinin G3	6474	54835	840.413	840.445	-0.0319	42.48	0.039	PPKESQR
						840.415	840.445	-0.0305	42.46	0.04	PPKESQR
						926.496	926.493	0.0025	64.78	0.0049	NALKPDNR
						926.497	926.493	0.0039	64.6	0.0052	NALKPDNR
						926.501	926.493	0.0073	64.84	0.0048	NALKPDNR
						927.485	926.493	0.9919	44.61	0.049	NALKPDNR
						977.532	977.529	0.0022	68.53	0.0028	LSAQFGSLR
						977.536	977.529	0.0066	68.53	0.0028	LSAQFGSLR
						977.547	977.529	0.0178	72.57	0.0011	LSAQFGSLR
						978.477	978.513	-0.0362	62.71	0.0036	LSAQFGSLR
						978.48	978.513	-0.0336	62.68	0.0035	LSAQFGSLR
						978.484	978.513	-0.0296	64.81	0.0022	LSAQFGSLR
						979.509	978.513	0.9956	62.72	0.0096	LSAQFGSLR
						979.509	978.513	0.9956	62.69	0.0096	LSAQFGSLR
						979.511	978.513	0.9974	64.81	0.0059	LSAQFGSLR
						1039.57	1039.58	-0.0032	67.03	0.00016	LNALKPDNR
						1039.59	1039.58	0.0122	45.63	0.0036	LNALKPDNR
						1039.59	1039.58	0.0132	66.37	7.5e-05	LNALKPDNR
						1040.31	1039.58	0.7306	66.97	0.00011	LNALKPDNR
						1040.56	1040.56	0.001	57.46	0.024	LNALKPDNR
						1040.57	1039.58	0.9896	45.63	0.0023	LNALKPDNR
						1040.57	1039.58	0.9944	66.97	0.00011	LNALKPDNR
						1096.61	1096.6	0.0096	52.78	0.0016	"LNALKPDNR
						1096.61	1096.6	0.0106	50.04	0.0015	"LNALKPDNR
						1194.5	1194.54	-0.0334	46.47	0.025	GIDETICTMR
						1194.53	1194.54	-0.0078	56.65	0.041	GIDETICTMR
						1195.53	1194.54	0.9878	46.47	0.032	GIDETICTMR
						1251.58	1251.56	0.0253	46.57	0.0049	"GIDETICTMR
						1446.77	1446.74	0.0311	72.25	3.9e-05	NKPFQCAGVALSR
						1446.78	1446.74	0.0349	69.19	3.5e-05	NKPFQCAGVALSR
						1446.78	1446.74	0.0367	69.36	3.7e-05	NKPFQCAGVALSR
						1449.61	1449.64	-0.0362	81.86	1.8e-06	SQSDNFEYVSFK
						1449.61	1449.64	-0.0346	81.85	2.5e-06	SQSDNFEYVSFK
						1449.61	1449.64	-0.0312	81.54	1.2e-06	SQSDNFEYVSFK
						1449.61	1449.64	-0.0308	81.57	1.5e-06	SQSDNFEYVSFK
						1449.61	1449.64	-0.0298	81.87	1.2e-06	SQSDNFEYVSFK
						1449.65	1449.64	0.0112	81.48	2e-06	SQSDNFEYVSFK
						1449.65	1449.64	0.0124	75.69	2.3e-05	SQSDNFEYVSFK
						1449.66	1449.64	0.0196	29.29	0.023	SQSDNFEYVSFK
						1449.67	1449.64	0.024	75.83	3.5e-06	SQSDNFEYVSFK
						1451.63	1451.61	0.025	44.72	0.003	SQSDNFEYVSFK
						1451.63	1451.61	0.0254	44.42	0.0023	SQSDNFEYVSFK
						1503.72	1503.69	0.0268	32.61	0.032	NAMFVPHYNLNAN
						1506.7	1506.66	0.0336	36.52	0.0056	"SQSDNFEYVSFK
						1506.7	1506.66	0.038	34.15	0.01	"SQSDNFEYVSFK
						1585.79	1585.74	0.0532	41.77	0.0013	FYLAGNQEQEFLQ
						1585.8	1585.74	0.0544	56.53	0.00015	FYLAGNQEQEFLQ
						1585.8	1585.74	0.0558	51.33	0.0011	FYLAGNQEQEFLQ
						1585.8	1585.74	0.0564	48.17	0.00079	FYLAGNQEQEFLQ
						1585.8	1585.74	0.0574	50	0.0014	FYLAGNQEQEFLQ
						1585.8	1585.74	0.058	42.54	0.0022	FYLAGNQEQEFLQ
						1585.8	1585.74	0.0582	68.9	9.6e-06	FYLAGNQEQEFLQ
						1585.8	1585.74	0.0582	41.82	0.004	FYLAGNQEQEFLQ
						1586.79	1586.73	0.0608	49.21	0.0012	FYLAGNQEQEFLQ
						1586.79	1586.73	0.0662	32.91	0.028	FYLAGNQEQEFLQ
						1586.79	1586.73	0.0686	31.88	0.03	FYLAGNQEQEFLQ
						1642.82	1642.76	0.0591	68.73	2e-05	"FYLAGNQEQEFLQ
						1642.82	1642.76	0.0621	45.34	0.0019	"FYLAGNQEQEFLQ
						1642.83	1642.76	0.0629	53.62	0.00041	"FYLAGNQEQEFLQ
						1644.84	1644.86	-0.0227	36.96	0.02	NPFSFLVPPKESQR
						1740.87	1741.84	-0.9749	67.98	0.00036	RFYLAGNQEQEFLQ
						1741.86	1741.84	0.0211	109.17	2.2e-07	RFYLAGNQEQEFLQ
						1741.87	1741.84	0.0249	91.68	3.2e-06	RFYLAGNQEQEFLQ
						1741.87	1741.84	0.0251	91.3	2.1e-06	RFYLAGNQEQEFLQ
						1741.88	1741.84	0.0426	29.96	0.047	RFYLAGNQEQEFLQ
						1741.89	1741.84	0.0471	31.55	0.027	RFYLAGNQEQEFLQ
						1741.89	1741.84	0.0487	93.52	5.2e-06	RFYLAGNQEQEFLQ
						1741.9	1741.84	0.0533	49.37	0.0098	RFYLAGNQEQEFLQ
						1741.9	1741.84	0.0533	41.15	0.007	RFYLAGNQEQEFLQ
						1741.9	1741.84	0.0537	66.11	0.00013	RFYLAGNQEQEFLQ
						1741.9	1741.84	0.0547	63.37	0.00033	RFYLAGNQEQEFLQ
						1741.9	1741.84	0.0599	61.36	0.0051	RFYLAGNQEQEFLQ
						1741.91	1742.83	-0.9209	84.84	6.1e-05	RFYLAGNQEQEFLQ
						1741.91	1741.84	0.0643	57.18	0.013	RFYLAGNQEQEFLQ
						1741.91	1741.84	0.0705	93.9	2.6e-06	RFYLAGNQEQEFLQ
						1741.91	1741.84	0.0707	99.21	4.4e-07	RFYLAGNQEQEFLQ
						1741.91	1742.83	-0.9127	89.79	2e-05	RFYLAGNQEQEFLQ
						1742.88	1742.83	0.0565	84.84	3.7e-06	RFYLAGNQEQEFLQ
						1742.88	1742.83	0.0575	89.79	9.3e-07	RFYLAGNQEQEFLQ
						1742.9	1742.83	0.0705	77.95	0.00019	RFYLAGNQEQEFLQ
						1758.89	1758.91	-0.0169	41.01	0.0071	NNPFSFLVPPKESQR
						1758.89	1758.91	-0.0125	50.25	0.002	NNPFSFLVPPKESQR
						1798.93	1798.86	0.0652	94.9	6e-06	"RFYLAGNQEQEFLQ
						1798.93	1798.86	0.0698	94.77	6.1e-06	"RFYLAGNQEQEFLQ
						1798.94	1798.86	0.0718	91.68	5.5e-06	"RFYLAGNQEQEFLQ
						1872.89	1872.95	-0.057	69.13	5.9e-05	NNNPFSFLVPPKESQR
						1872.89	1872.95	-0.055	68.8	0.0015	NNNPFSFLVPPKESQR
						1872.91	1872.95	-0.0412	68.79	0.0023	NNNPFSFLVPPKESQR
						1872.92	1872.95	-0.0257	36.43	0.031	NNNPFSFLVPPKESQR
						1872.93	1872.95	-0.019	32.95	0.022	NNNPFSFLVPPKESQR
						1872.93	1872.95	-0.0176	51.42	0.00066	NNNPFSFLVPPKESQR
						1872.93	1872.95	-0.0134	66.33	4.2e-05	NNNPFSFLVPPKESQR
						1873.91	1873.93	-0.0174	48.99	0.00081	NNNPFSFLVPPKESQR
						1873.92	1872.95	0.9722	65.98	3.1e-05	NNNPFSFLVPPKESQR
						1873.92	1873.93	-0.0098	69.26	1.7e-05	NNNPFSFLVPPKESQR
						1873.93	1873.93	-0.0056	69.24	2e-05	NNNPFSFLVPPKESQR
						1874.89	1873.93	0.953	68.46	6.6e-06	NNNPFSFLVPPKESQR
						1875.94	1875.9	0.0416	54.27	0.00024	NNNPFSFLVPPKESQR
						1875.94	1875.9	0.0444	53.88	0.00024	NNNPFSFLVPPKESQR
						1929.96	1929.97	-0.008	53.41	0.001	"NNNPFSFLVPPKESQR
						2230.1	2230.07	0.031	55.12	0.00051	FYLAGNQEQEFLQYQPQK
						2230.1	2230.07	0.0348	61.77	7.7e-05	FYLAGNQEQEFLQYQPQK
						2386.2	2386.17	0.0261	45.68	0.0003	RFYLAGNQEQEFLQYQPQK
						2386.2	2386.17	0.0285	49.74	0.00011	RFYLAGNQEQEFLQYQPQK
						2386.21	2386.17	0.0355	40.65	0.0035	RFYLAGNQEQEFLQYQPQK
						2386.21	2386.17	0.0358	37.57	0.0023	RFYLAGNQEQEFLQYQPQK
						2491.23	2492.23	-0.9921	94.84	5.3e-06	NAMFVPHYNLNANSIIYALNGR
						2491.24	2491.24	0.0018	83.97	2.5e-07	NAMFVPHYNLNANSIIYALNGR
						2491.25	2492.23	-0.9795	75.69	0.00043	NAMFVPHYNLNANSIIYALNGR
						2491.25	2491.24	0.0096	58.99	3.6e-05	NAMFVPHYNLNANSIIYALNGR
						2491.26	2491.24	0.0132	90.43	1.9e-07	NAMFVPHYNLNANSIIYALNGR
						2492.24	2493.21	-0.9756	105.43	4.6e-07	NAMFVPHYNLNANSIIYALNGR
						2492.24	2492.23	0.0096	92.11	4.8e-06	NAMFVPHYNLNANSIIYALNGR
						2492.24	2492.23	0.0162	98.98	1.6e-08	NAMFVPHYNLNANSIIYALNGR
						2492.25	2492.23	0.0204	94.84	4.3e-08	NAMFVPHYNLNANSIIYALNGR
						2492.25	2493.21	-0.9609	62.16	0.0097	NAMFVPHYNLNANSIIYALNGR
						2492.25	2492.23	0.0255	70.47	5.8e-06	NAMFVPHYNLNANSIIYALNGR
						2492.26	2492.23	0.0318	52.23	0.0002	NAMFVPHYNLNANSIIYALNGR
						2493.22	2493.21	0.0081	105.43	4.6e-07	NAMFVPHYNLNANSIIYALNGR
						2493.23	2493.21	0.021	76.64	1e-06	NAMFVPHYNLNANSIIYALNGR
						2494.24	2494.2	0.0491	52.65	0.0082	NAMFVPHYNLNANSIIYALNGR
						2499.33	2499.31	0.0188	55.51	0.00013	VFDGELQEGQVLIVPQNFAVAAR
						2499.34	2499.31	0.0233	62.59	6e-05	VFDGELQEGQVLIVPQNFAVAAR
						2499.34	2499.31	0.0272	39.71	0.0092	VFDGELQEGQVLIVPQNFAVAAR
						2499.34	2499.31	0.0275	60.94	5.9e-05	VFDGELQEGQVLIVPQNFAVAAR
						2508.24	2508.22	0.0163	86.73	1.7e-06	NAMFVPHYNLNANSIIYALNGR
						2548.28	2548.26	0.0205	25.26	0.024	"NAMFVPHYNLNANSIIYALNGR
						2548.29	2548.26	0.0232	50.07	0.00036	"NAMFVPHYNLNANSIIYALNGR
						2549.27	2549.25	0.0199	41.15	0.019	"NAMFVPHYNLNANSIIYALNGR
						2620.33	2620.32	0.0062	88.15	1.3e-07	KNAMFVPHYNLNANSIIYALNGR
						2620.34	2620.32	0.0167	73.56	3.4e-06	KNAMFVPHYNLNANSIIYALNGR
						3020.4	3020.45	-0.0411	164.98	1.4e-14	IESEGGFIETWNPNNKPFQCAGVALSR
						3020.41	3020.45	-0.039	160.95	2.3e-14	IESEGGFIETWNPNNKPFQCAGVALSR
						3020.41	3020.45	-0.0378	165.03	9.5e-15	IESEGGFIETWNPNNKPFQCAGVALSR
						3020.45	3020.45	0.003	63.53	9.1e-06	IESEGGFIETWNPNNKPFQCAGVALSR
						3020.45	3020.45	0.0054	138	1.1e-12	IESEGGFIETWNPNNKPFQCAGVALSR
						3020.45	3020.45	0.0059	82.94	1.8e-07	IESEGGFIETWNPNNKPFQCAGVALSR
						3020.45	3020.45	0.0084	144.93	2e-12	IESEGGFIETWNPNNKPFQCAGVALSR
						3020.46	3020.45	0.0141	95.08	1.9e-08	IESEGGFIETWNPNNKPFQCAGVALSR
						3020.46	3020.45	0.0147	116.34	4.6e-10	IESEGGFIETWNPNNKPFQCAGVALSR
						3020.46	3020.45	0.0163	65.86	9.3e-06	IESEGGFIETWNPNNKPFQCAGVALSR
						3020.46	3020.45	0.0189	106.07	1.2e-09	IESEGGFIETWNPNNKPFQCAGVALSR
						3020.47	3020.45	0.0207	52.06	0.00024	IESEGGFIETWNPNNKPFQCAGVALSR
						3020.48	3020.45	0.0309	196.21	1.9e-17	IESEGGFIETWNPNNKPFQCAGVALSR
						3020.48	3020.45	0.0312	90.03	6.2e-08	IESEGGFIETWNPNNKPFQCAGVALSR
						3020.48	3020.45	0.0366	170.65	5.9e-15	IESEGGFIETWNPNNKPFQCAGVALSR
						3020.48	3020.45	0.0369	186.07	3.8e-16	IESEGGFIETWNPNNKPFQCAGVALSR
						3020.48	3020.45	0.0375	139.56	3e-12	IESEGGFIETWNPNNKPFQCAGVALSR
						3020.49	3020.45	0.0435	199.71	8.6e-18	IESEGGFIETWNPNNKPFQCAGVALSR
						3023.47	3023.4	0.0774	30.6	0.015	IESEGGFIETWNPNNKPFQCAGVALSR
						3023.48	3023.4	0.0864	34.06	0.0099	IESEGGFIETWNPNNKPFQCAGVALSR
						3077.5	3077.47	0.032	185.25	9.5e-17	"IESEGGFIETWNPNNKPFQCAGVALSR
						3077.51	3077.47	0.0389	35.9	0.0091	"IESEGGFIETWNPNNKPFQCAGVALSR
						3077.51	3077.47	0.041	66.35	1.3e-05	"IESEGGFIETWNPNNKPFQCAGVALSR
						3116.45	3116.44	0.0153	184	4.8e-16	*QQEEENEGGSILSGFAPEFLEHAFVVDR
						3133.46	3133.46	-0.0057	119.43	3.5e-10	QQEEENEGGSILSGFAPEFLEHAFVVDR
						3133.49	3134.45	-0.9582	231.78	8.7e-20	QQEEENEGGSILSGFAPEFLEHAFVVDR
						3133.49	3133.46	0.0267	175.67	4.2e-15	QQEEENEGGSILSGFAPEFLEHAFVVDR
						3289.57	3289.56	0.0054	113.6	3.3e-09	RQQEEENEGGSILSGFAPEFLEHAFVVDR
						3289.58	3289.56	0.0159	103.4	8.2e-09	RQQEEENEGGSILSGFAPEFLEHAFVVDR
						3289.58	3289.56	0.0197	83.85	8.6e-07	RQQEEENEGGSILSGFAPEFLEHAFVVDR
						3289.59	3289.56	0.0249	89.48	2.2e-07	RQQEEENEGGSILSGFAPEFLEHAFVVDR
						3464.79	3464.8	-0.0102	98.03	7.1e-09	TNDRPSIGNLAGANSLLNALPEEVIQQTFNLR
						3464.79	3464.8	-0.0079	43.82	0.0022	TNDRPSIGNLAGANSLLNALPEEVIQQTFNLR
						3464.8	3464.8	0.0021	132.79	3.3e-11	TNDRPSIGNLAGANSLLNALPEEVIQQTFNLR
						3464.81	3464.8	0.0093	52.87	0.00031	TNDRPSIGNLAGANSLLNALPEEVIQQTFNLR
						3464.81	3464.8	0.0096	119.68	2.2e-10	TNDRPSIGNLAGANSLLNALPEEVIQQTFNLR
						3464.82	3464.8	0.0141	79.23	6.6e-07	TNDRPSIGNLAGANSLLNALPEEVIQQTFNLR
						3613.8	3613.81	-0.0025	115.4	5.6e-10	HNIGQTSSPDIFNPQAGSITTATSLDFPALSWLK
						3613.81	3613.81	0.0041	112.57	6.8e-10	HNIGQTSSPDIFNPQAGSITTATSLDFPALSWLK
						3613.82	3613.81	0.0098	143.98	8.4e-13	HNIGQTSSPDIFNPQAGSITTATSLDFPALSWLK
						3620.91	3620.9	0.011	76.46	1.2e-05	TNDRPSIGNLAGANSLLNALPEEVIQQTFNLRR
	5	A0A0R0GMV1	Cupin type-1 domain-containing protein (Fragment)	6447	55566	820.412	820.411	0.0007	44.15	0.0084	CAGVTVSK
						820.413	820.411	0.0015	43.17	0.0067	CAGVTVSK
						1093.51	1093.52	-0.0008	38.16	0.038	*QQLQDSHQK
						1093.52	1093.52	0.0042	39.63	0.013	*QQLQDSHQK
						1255.64	1255.63	0.0131	56.13	0.00034	THHNAVSSYIK
						1255.65	1255.63	0.0211	49.48	0.00067	THHNAVSSYIK
						1255.65	1255.63	0.0219	51.8	0.00051	THHNAVSSYIK
						1325.64	1325.63	0.0109	66.53	0.00019	SQQQLQDSHQK
						1325.64	1325.63	0.0111	66.63	0.00018	SQQQLQDSHQK
						1325.65	1325.63	0.0151	63.13	0.0011	SQQQLQDSHQK
						1325.65	1325.63	0.0161	66.55	0.00018	SQQQLQDSHQK
						1325.65	1325.63	0.0191	54.96	0.011	SQQQLQDSHQK
						1397.8	1397.82	-0.0231	74.62	1.6e-05	ISTLNSLTLPALR
						1397.8	1397.82	-0.0211	75.43	1.3e-05	ISTLNSLTLPALR
						1397.81	1397.82	-0.0139	67.22	8.2e-05	ISTLNSLTLPALR
						1397.82	1397.82	-0.0037	70.93	0.00023	ISTLNSLTLPALR
						1397.83	1397.82	0.0023	72.69	1.6e-05	ISTLNSLTLPALR
						1397.84	1397.82	0.0147	75.68	1.5e-05	ISTLNSLTLPALR
						1454.86	1454.85	0.0166	63.28	0.00024	"ISTLNSLTLPALR
						1508.84	1508.85	-0.0004	70.37	0.00099	*QIVTVEGGLSVISPK
						1508.85	1508.85	0.0018	54.41	0.00063	*QIVTVEGGLSVISPK
						1508.85	1508.85	0.0052	70.62	0.00026	*QIVTVEGGLSVISPK
						1508.85	1508.85	0.0054	47.42	0.014	*QIVTVEGGLSVISPK
						1508.85	1508.85	0.0062	70.2	0.00014	*QIVTVEGGLSVISPK
						1508.85	1508.85	0.0072	49.3	0.0013	*QIVTVEGGLSVISPK
						1508.85	1508.85	0.0084	66.1	5.3e-05	*QIVTVEGGLSVISPK
						1508.85	1508.85	0.0096	90.69	3.4e-06	*QIVTVEGGLSVISPK
						1508.86	1508.85	0.0106	92.86	5.8e-06	*QIVTVEGGLSVISPK
						1508.86	1508.85	0.0106	109.12	1.4e-07	*QIVTVEGGLSVISPK
						1508.86	1508.85	0.0114	56.33	0.0013	*QIVTVEGGLSVISPK
						1508.86	1508.85	0.0118	62.2	0.0052	*QIVTVEGGLSVISPK
						1508.86	1508.85	0.0118	94.55	4e-07	*QIVTVEGGLSVISPK
						1508.86	1508.85	0.013	76.68	0.00011	*QIVTVEGGLSVISPK
						1508.86	1508.85	0.0146	64.37	0.00014	*QIVTVEGGLSVISPK
						1508.86	1508.85	0.0148	80.44	7.7e-06	*QIVTVEGGLSVISPK
						1525.88	1525.87	0.0051	59.68	0.00092	QIVTVEGGLSVISPK
						1525.88	1525.87	0.0061	81.43	2.2e-06	QIVTVEGGLSVISPK
						1525.88	1525.87	0.0065	98.86	2.6e-07	QIVTVEGGLSVISPK
						1525.88	1525.87	0.0087	86	2.3e-06	QIVTVEGGLSVISPK
						1525.88	1525.87	0.0089	72.75	5.8e-05	QIVTVEGGLSVISPK
						1525.88	1525.87	0.0089	71.2	5.2e-05	QIVTVEGGLSVISPK
						1525.88	1525.87	0.0095	80.68	2e-05	QIVTVEGGLSVISPK
						1525.88	1525.87	0.0097	83.93	2.2e-06	QIVTVEGGLSVISPK
						1525.88	1525.87	0.0101	77.86	1.8e-05	QIVTVEGGLSVISPK
						1525.88	1525.87	0.0101	55.87	0.0015	QIVTVEGGLSVISPK
						1525.88	1525.87	0.0103	79.3	1.4e-05	QIVTVEGGLSVISPK
						1525.88	1525.87	0.0107	61.16	0.0012	QIVTVEGGLSVISPK
						1525.88	1525.87	0.0107	92.44	5.5e-07	QIVTVEGGLSVISPK
						1525.88	1525.87	0.0109	75.37	5.1e-05	QIVTVEGGLSVISPK
						1525.88	1525.87	0.0113	63.44	0.00053	QIVTVEGGLSVISPK
						1525.88	1525.87	0.0135	59.74	0.00016	QIVTVEGGLSVISPK
						1525.89	1525.87	0.0137	89.15	1.2e-06	QIVTVEGGLSVISPK
						1525.89	1525.87	0.0141	48.26	0.046	QIVTVEGGLSVISPK
						1525.89	1525.87	0.0151	48.25	0.0049	QIVTVEGGLSVISPK
						1525.89	1525.87	0.0153	76.23	1.8e-05	QIVTVEGGLSVISPK
						1525.89	1525.87	0.0153	82.42	4.8e-06	QIVTVEGGLSVISPK
						1525.89	1525.87	0.0155	74.21	2.6e-05	QIVTVEGGLSVISPK
						1525.89	1525.87	0.0157	77.1	1.4e-05	QIVTVEGGLSVISPK
						1525.89	1525.87	0.0163	92.3	1e-06	QIVTVEGGLSVISPK
						1525.89	1525.87	0.0163	97.07	2.1e-07	QIVTVEGGLSVISPK
						1525.89	1525.87	0.0167	81.92	5.5e-06	QIVTVEGGLSVISPK
						1525.89	1525.87	0.0167	92.36	5.4e-07	QIVTVEGGLSVISPK
						1525.89	1525.87	0.0173	81.01	3.3e-05	QIVTVEGGLSVISPK
						1525.89	1525.87	0.0175	85.75	2.3e-06	QIVTVEGGLSVISPK
						1525.89	1525.87	0.0183	86.99	1.7e-06	QIVTVEGGLSVISPK
						1525.89	1525.87	0.0185	71.96	1.9e-05	QIVTVEGGLSVISPK
						1525.89	1525.87	0.0189	61.76	0.00015	QIVTVEGGLSVISPK
						1525.89	1525.87	0.0199	68.22	6.7e-05	QIVTVEGGLSVISPK
						1525.89	1525.87	0.0217	76.22	1.6e-05	QIVTVEGGLSVISPK
						1525.89	1525.87	0.0219	67.31	8.2e-05	QIVTVEGGLSVISPK
						1525.89	1525.87	0.0229	77.77	6.5e-06	QIVTVEGGLSVISPK
						1525.89	1525.87	0.0235	91.09	1.3e-06	QIVTVEGGLSVISPK
						1525.9	1525.87	0.0289	86.35	3.5e-06	QIVTVEGGLSVISPK
						1525.9	1525.87	0.0289	81.01	4.8e-06	QIVTVEGGLSVISPK
						1525.9	1525.87	0.0325	36.43	0.0068	QIVTVEGGLSVISPK
						1525.91	1525.87	0.0339	84.96	1.6e-06	QIVTVEGGLSVISPK
						1653.97	1653.97	0.0026	54.87	0.0015	KQIVTVEGGLSVISPK
						1653.97	1653.97	0.0044	59.76	0.0021	KQIVTVEGGLSVISPK
						1653.97	1653.97	0.0074	72.58	0.00037	KQIVTVEGGLSVISPK
						1653.97	1653.97	0.0076	50.15	0.0095	KQIVTVEGGLSVISPK
						1653.97	1653.97	0.008	47.51	0.029	KQIVTVEGGLSVISPK
						1653.98	1653.97	0.0088	42.3	0.03	KQIVTVEGGLSVISPK
						1653.98	1653.97	0.01	71.67	0.00081	KQIVTVEGGLSVISPK
						1653.98	1653.97	0.01	56	0.0029	KQIVTVEGGLSVISPK
						1653.98	1653.97	0.0104	57.63	0.0017	KQIVTVEGGLSVISPK
						1653.98	1653.97	0.0104	51.47	0.0034	KQIVTVEGGLSVISPK
						1653.98	1653.97	0.0104	59.75	0.0012	KQIVTVEGGLSVISPK
						1653.98	1653.97	0.011	78.64	2.2e-05	KQIVTVEGGLSVISPK
						1653.98	1653.97	0.011	66.6	0.00077	KQIVTVEGGLSVISPK
						1653.98	1653.97	0.0112	75.72	0.00018	KQIVTVEGGLSVISPK
						1653.98	1653.97	0.0118	57.81	0.00086	KQIVTVEGGLSVISPK
						1653.98	1653.97	0.0121	48.06	0.0042	KQIVTVEGGLSVISPK
						1653.98	1653.97	0.0122	73.12	0.00013	KQIVTVEGGLSVISPK
						1653.98	1653.97	0.0128	82.3	9.3e-06	KQIVTVEGGLSVISPK
						1653.98	1653.97	0.0137	70.94	8.3e-05	KQIVTVEGGLSVISPK
						1653.98	1653.97	0.014	78.6	9.1e-05	KQIVTVEGGLSVISPK
						1653.98	1653.97	0.0142	54.47	0.00089	KQIVTVEGGLSVISPK
						1653.98	1653.97	0.0146	56.5	0.0017	KQIVTVEGGLSVISPK
						1653.98	1653.97	0.0146	54.65	0.00062	KQIVTVEGGLSVISPK
						1653.98	1653.97	0.0147	42.79	0.0096	KQIVTVEGGLSVISPK
						1653.98	1653.97	0.0147	59.1	0.00029	KQIVTVEGGLSVISPK
						1653.98	1653.97	0.0153	73.17	0.00034	KQIVTVEGGLSVISPK
						1653.98	1653.97	0.0157	100.21	1.8e-06	KQIVTVEGGLSVISPK
						1653.98	1653.97	0.0161	103.6	8.1e-07	KQIVTVEGGLSVISPK
						1653.98	1653.97	0.0161	76.53	5.8e-05	KQIVTVEGGLSVISPK
						1653.98	1653.97	0.0169	117.72	3.1e-08	KQIVTVEGGLSVISPK
						1653.99	1653.97	0.019	49.85	0.034	KQIVTVEGGLSVISPK
						1653.99	1653.97	0.0191	70.31	0.0017	KQIVTVEGGLSVISPK
						1653.99	1653.97	0.0193	58.02	0.0062	KQIVTVEGGLSVISPK
						1653.99	1653.97	0.0195	136.54	4.1e-10	KQIVTVEGGLSVISPK
						1653.99	1653.97	0.0235	39.37	0.005	KQIVTVEGGLSVISPK
						1653.99	1653.97	0.0247	78.64	5.7e-05	KQIVTVEGGLSVISPK
						1653.99	1653.97	0.0253	84.74	3.3e-05	KQIVTVEGGLSVISPK
						1653.99	1653.97	0.0257	104.32	6.9e-07	KQIVTVEGGLSVISPK
						1653.99	1653.97	0.0257	72.88	0.00014	KQIVTVEGGLSVISPK
						1653.99	1653.97	0.0279	116.72	4e-08	KQIVTVEGGLSVISPK
						1654	1653.97	0.0327	65.66	8e-05	KQIVTVEGGLSVISPK
						1654	1653.97	0.0383	60.09	0.00013	KQIVTVEGGLSVISPK
						1751.91	1751.89	0.0212	34.79	0.029	HFNEGDVLVIPPGVPY
						1850.85	1850.84	0.009	124.28	1.6e-10	HFLAQSFNTNEDTAEK
						1850.87	1850.84	0.0278	120.08	2.1e-09	HFLAQSFNTNEDTAEK
						1850.87	1850.84	0.0304	130.62	1.3e-10	HFLAQSFNTNEDTAEK
						1850.88	1850.84	0.0318	55	0.0019	HFLAQSFNTNEDTAEK
						1850.88	1850.84	0.0345	56.94	0.00023	HFLAQSFNTNEDTAEK
						1850.88	1850.84	0.0378	53.2	0.0015	HFLAQSFNTNEDTAEK
						1850.89	1850.84	0.0418	120.31	6.8e-10	HFLAQSFNTNEDTAEK
						2083	2082.95	0.0413	120.67	2.1e-09	FNECQLNNLNALEPDHR
						2083.01	2082.95	0.0575	75.69	2.8e-05	FNECQLNNLNALEPDHR
						2083.01	2082.95	0.0575	70.95	3.1e-05	FNECQLNNLNALEPDHR
						2083.01	2082.95	0.0583	107.04	7.1e-08	FNECQLNNLNALEPDHR
						2083.01	2083.94	-0.9257	82.55	1.8e-05	FNECQLNNLNALEPDHR
						2083.01	2082.95	0.0583	104.12	1.6e-07	FNECQLNNLNALEPDHR
						2083.97	2083.94	0.0363	90.07	2.6e-06	FNECQLNNLNALEPDHR
						2083.97	2083.94	0.0366	72.59	1e-05	FNECQLNNLNALEPDHR
						2083.98	2083.94	0.0375	69.04	3e-05	FNECQLNNLNALEPDHR
						2141.97	2141.96	0.005	130.21	4.3e-11	*QGQHQQQEEEGGSVLSGFSK
						2141.99	2141.96	0.0272	131.32	2.8e-11	*QGQHQQQEEEGGSVLSGFSK
						2159.01	2158.99	0.0271	127.87	4e-11	QGQHQQQEEEGGSVLSGFSK
						2159.02	2158.99	0.0305	118.62	1.2e-10	QGQHQQQEEEGGSVLSGFSK
						2159.03	2158.99	0.0425	117.84	2.5e-10	QGQHQQQEEEGGSVLSGFSK
						2287.11	2287.08	0.0287	116.99	1.4e-09	KQGQHQQQEEEGGSVLSGFSK
						2287.12	2287.08	0.0383	143.2	7e-12	KQGQHQQQEEEGGSVLSGFSK
						2287.12	2287.08	0.0393	132.28	3.2e-10	KQGQHQQQEEEGGSVLSGFSK
						2287.13	2287.08	0.0443	88.69	2.5e-07	KQGQHQQQEEEGGSVLSGFSK
						2287.13	2287.08	0.0455	72.92	6.9e-05	KQGQHQQQEEEGGSVLSGFSK
						2287.13	2287.08	0.0473	105.06	2e-08	KQGQHQQQEEEGGSVLSGFSK
						2289.03	2289.05	-0.0167	115.92	4.3e-08	KQGQHQQQEEEGGSVLSGFSK
						2289.04	2289.05	-0.0145	80.79	0.00014	KQGQHQQQEEEGGSVLSGFSK
						2289.04	2289.05	-0.013	76.07	0.00042	KQGQHQQQEEEGGSVLSGFSK
						2289.04	2289.05	-0.0105	115.64	4.6e-08	KQGQHQQQEEEGGSVLSGFSK
						2289.05	2289.05	-0.0007	76	0.00042	KQGQHQQQEEEGGSVLSGFSK
						2289.05	2289.05	0.0023	117.72	2.8e-08	KQGQHQQQEEEGGSVLSGFSK
						2318.16	2318.14	0.0166	70.1	6.8e-06	NGIYSPHWNLNANSVIYVTR
						2318.16	2318.14	0.0196	90.39	6.9e-08	NGIYSPHWNLNANSVIYVTR
						2340.25	2340.23	0.0152	52.46	0.019	NGLHLPSYSPYPQMIIVVQGK
						2340.25	2340.23	0.0176	58.98	0.021	NGLHLPSYSPYPQMIIVVQGK
						2340.26	2340.23	0.0266	32.43	0.026	NGLHLPSYSPYPQMIIVVQGK
						2340.26	2340.23	0.029	42.25	0.0023	NGLHLPSYSPYPQMIIVVQGK
						2341.23	2341.21	0.0158	79.45	0.00019	NGLHLPSYSPYPQMIIVVQGK
						2341.23	2341.21	0.0191	54.81	0.0039	NGLHLPSYSPYPQMIIVVQGK
						2341.23	2341.21	0.0192	47.73	0.0018	NGLHLPSYSPYPQMIIVVQGK
						2341.24	2341.21	0.0212	48.5	0.003	NGLHLPSYSPYPQMIIVVQGK
						2341.24	2341.21	0.0212	46.2	0.0033	NGLHLPSYSPYPQMIIVVQGK
						2341.24	2341.21	0.0236	52.33	0.0013	NGLHLPSYSPYPQMIIVVQGK
						2538.17	2538.2	-0.029	93.8	9.7e-08	"AIGFAFPGCPETFEKPQQQSSR
						2538.18	2538.2	-0.0113	112.44	6.6e-10	"AIGFAFPGCPETFEKPQQQSSR
						2538.21	2538.2	0.0127	112.71	4.9e-10	"AIGFAFPGCPETFEKPQQQSSR
						2540.17	2539.18	0.9931	37.78	0.0044	"AIGFAFPGCPETFEKPQQQSSR
						2595.25	2595.22	0.0303	61.28	2.5e-05	"GAIGFAFPGCPETFEKPQQQSSR
						2595.25	2595.22	0.0321	45.05	0.0063	"GAIGFAFPGCPETFEKPQQQSSR
						2595.25	2595.22	0.0321	54.63	0.0002	"GAIGFAFPGCPETFEKPQQQSSR
						2595.25	2595.22	0.0342	34.84	0.035	"GAIGFAFPGCPETFEKPQQQSSR
						2595.25	2595.22	0.0354	55.73	6.5e-05	"GAIGFAFPGCPETFEKPQQQSSR
						2595.26	2595.22	0.0381	35.37	0.024	"GAIGFAFPGCPETFEKPQQQSSR
						2728.32	2728.29	0.0295	112.25	4.2e-09	VFYLAGNPDIEHPETMQQQQQQK
						2728.32	2728.29	0.0322	117.81	1.3e-09	VFYLAGNPDIEHPETMQQQQQQK
						2728.35	2728.29	0.0571	126.72	2.7e-10	VFYLAGNPDIEHPETMQQQQQQK
						2785.35	2785.31	0.0407	54.2	7.8e-05	"VFYLAGNPDIEHPETMQQQQQQK
						2785.36	2785.31	0.044	31.28	0.021	"VFYLAGNPDIEHPETMQQQQQQK
						2825.5	2825.49	0.0059	72.27	0.00011	TLNRNGLHLPSYSPYPQMIIVVQGK
						2825.5	2825.49	0.0102	89.74	4.5e-06	TLNRNGLHLPSYSPYPQMIIVVQGK
						2825.51	2825.49	0.0159	113.76	6.1e-08	TLNRNGLHLPSYSPYPQMIIVVQGK
						2825.51	2825.49	0.0159	63.57	0.0005	TLNRNGLHLPSYSPYPQMIIVVQGK
						2825.51	2825.49	0.0186	101.79	9.6e-07	TLNRNGLHLPSYSPYPQMIIVVQGK
						2946.54	2946.55	-0.0055	91.74	1.2e-07	GQLLVVPQNFVVAEQGGEQGLEYVVFK
						2954.43	2954.41	0.0213	72.46	0.00079	VESEGGLIETWNSQHPELQCAGVTVSK
						2955.43	2955.39	0.0392	108.67	1.9e-07	VESEGGLIETWNSQHPELQCAGVTVSK
						2955.43	2955.39	0.0392	89.08	1.7e-05	VESEGGLIETWNSQHPELQCAGVTVSK
						2955.43	2955.39	0.0395	94.22	5.3e-06	VESEGGLIETWNSQHPELQCAGVTVSK
		A0A0R0KK84	Cupin type-1 domain-containing protein	12197	55274	840.413	840.409	0.0045	42.48	0.039	PPQESQR
						840.415	840.409	0.0059	42.46	0.04	PPQESQR
						926.496	926.493	0.0025	64.78	0.0049	NALKPDNR
						926.497	926.493	0.0039	64.6	0.0052	NALKPDNR
						926.501	926.493	0.0073	64.84	0.0048	NALKPDNR
						927.485	926.493	0.9919	44.61	0.049	NALKPDNR
						993.523	993.524	-0.0011	71.33	0.00021	LSAQYGSLR
						993.526	993.524	0.0019	72.68	0.0008	LSAQYGSLR
						993.527	993.524	0.0023	49.8	0.0045	LSAQYGSLR
						1039.57	1039.58	-0.0032	67.03	0.00016	LNALKPDNR
						1039.59	1039.58	0.0122	45.63	0.0036	LNALKPDNR
						1039.59	1039.58	0.0132	66.37	7.5e-05	LNALKPDNR
						1040.31	1039.58	0.7306	66.97	0.00011	LNALKPDNR
						1040.56	1040.56	0.001	57.46	0.024	LNALKPDNR
						1040.57	1039.58	0.9896	45.63	0.0023	LNALKPDNR
						1040.57	1039.58	0.9944	66.97	0.00011	LNALKPDNR
						1096.61	1096.6	0.0096	52.78	0.0016	"LNALKPDNR
						1096.61	1096.6	0.0106	50.04	0.0015	"LNALKPDNR
						1121.64	1121.62	0.0178	53.25	0.046	LSAQYGSLRK
						1148.52	1148.54	-0.0199	60.07	0.0013	VFDGELQEGGV
						1148.52	1148.54	-0.0139	60.31	0.002	VFDGELQEGGV
						1148.57	1148.54	0.0309	57.72	0.002	VFDGELQEGGV
						1148.57	1148.54	0.0327	48.47	0.0021	VFDGELQEGGV
						1148.57	1148.54	0.0335	55.66	0.0051	VFDGELQEGGV
						1194.5	1194.54	-0.0334	46.47	0.025	GIDETICTMR
						1194.53	1194.54	-0.0078	56.65	0.041	GIDETICTMR
						1195.53	1194.54	0.9878	46.47	0.032	GIDETICTMR
						1220.68	1220.68	0.0026	56.09	0.0023	ILSGFAPEFLK
						1251.58	1251.56	0.0253	46.57	0.0049	"GIDETICTMR
						1262.65	1262.64	0.0043	32.84	0.049	EAFGVNMQIVR
						1262.65	1262.64	0.0047	45.96	0.0023	EAFGVNMQIVR
						1262.65	1262.64	0.0079	31.75	0.033	EAFGVNMQIVR
						1262.65	1262.64	0.0093	38.05	0.0039	EAFGVNMQIVR
						1262.65	1262.64	0.0107	41.53	0.003	EAFGVNMQIVR
						1262.66	1262.64	0.0117	45.83	0.0011	EAFGVNMQIVR
						1262.66	1262.64	0.0135	52.29	0.0015	EAFGVNMQIVR
						1262.66	1262.64	0.0141	51.87	0.0038	EAFGVNMQIVR
						1262.66	1262.64	0.0143	54.75	0.0013	EAFGVNMQIVR
						1262.66	1262.64	0.0151	44.74	0.011	EAFGVNMQIVR
						1262.66	1262.64	0.0163	55.89	0.00063	EAFGVNMQIVR
						1262.67	1262.64	0.0269	78.61	2.1e-05	EAFGVNMQIVR
						1262.67	1262.64	0.0285	78.63	2.1e-05	EAFGVNMQIVR
						1262.67	1262.64	0.0309	78.32	2.1e-05	EAFGVNMQIVR
						1278.65	1278.64	0.016	60.72	0.00042	EAFGVNMQIVR
						1278.66	1278.64	0.0198	53.71	0.0035	EAFGVNMQIVR
						1278.66	1278.64	0.0214	56.96	0.0027	EAFGVNMQIVR
						1421.77	1421.76	0.0132	58.27	0.00042	SNILSGFAPEFLK
						1421.77	1421.76	0.0144	59.11	0.00069	SNILSGFAPEFLK
						1421.77	1421.76	0.0144	57.91	0.0007	SNILSGFAPEFLK
						1446.77	1446.74	0.0311	72.25	3.9e-05	NKPFQCAGVALSR
						1446.78	1446.74	0.0349	69.19	3.5e-05	NKPFQCAGVALSR
						1446.78	1446.74	0.0367	69.36	3.7e-05	NKPFQCAGVALSR
						1449.61	1449.64	-0.0362	81.86	1.8e-06	SQSDNFEYVSFK
						1449.61	1449.64	-0.0346	81.85	2.5e-06	SQSDNFEYVSFK
						1449.61	1449.64	-0.0312	81.54	1.2e-06	SQSDNFEYVSFK
						1449.61	1449.64	-0.0308	81.57	1.5e-06	SQSDNFEYVSFK
						1449.61	1449.64	-0.0298	81.87	1.2e-06	SQSDNFEYVSFK
						1449.65	1449.64	0.0112	81.48	2e-06	SQSDNFEYVSFK
						1449.65	1449.64	0.0124	75.69	2.3e-05	SQSDNFEYVSFK
						1449.66	1449.64	0.0196	29.29	0.023	SQSDNFEYVSFK
						1449.67	1449.64	0.024	75.83	3.5e-06	SQSDNFEYVSFK
						1451.63	1451.61	0.025	44.72	0.003	SQSDNFEYVSFK
						1451.63	1451.61	0.0254	44.42	0.0023	SQSDNFEYVSFK
						1493.69	1493.69	0.009	68.33	6.1e-05	YQQQQQGGSQSQK
						1493.7	1493.69	0.0094	33.57	0.0073	YQQQQQGGSQSQK
						1493.7	1493.69	0.0114	50.41	0.0027	YQQQQQGGSQSQK
						1506.7	1506.66	0.0336	36.52	0.0056	"SQSDNFEYVSFK
						1506.7	1506.66	0.038	34.15	0.01	"SQSDNFEYVSFK
						1528.68	1528.69	-0.0171	55.15	0.016	EQPQQNECQIQK
						1528.69	1528.69	-0.0029	60.47	0.017	EQPQQNECQIQK
						1528.71	1528.69	0.0159	54.9	0.0019	EQPQQNECQIQK
						1528.71	1528.69	0.0195	58.32	0.0019	EQPQQNECQIQK
						1528.71	1528.69	0.0203	60.24	0.0017	EQPQQNECQIQK
						1530.7	1530.66	0.0396	43.2	0.0053	EQPQQNECQIQK
						1585.79	1585.78	0.0168	41.77	0.0013	FYLAGNQEQEFLK
						1585.8	1585.78	0.018	56.53	0.00015	FYLAGNQEQEFLK
						1585.8	1585.78	0.0194	51.33	0.0011	FYLAGNQEQEFLK
						1585.8	1585.78	0.02	48.17	0.00079	FYLAGNQEQEFLK
						1585.8	1585.78	0.021	50	0.0014	FYLAGNQEQEFLK
						1585.8	1585.78	0.0216	42.54	0.0022	FYLAGNQEQEFLK
						1585.8	1585.78	0.0218	68.9	9.6e-06	FYLAGNQEQEFLK
						1585.8	1585.78	0.0218	41.82	0.004	FYLAGNQEQEFLK
						1586.79	1586.76	0.0244	49.21	0.0012	FYLAGNQEQEFLK
						1586.79	1586.76	0.0298	32.91	0.028	FYLAGNQEQEFLK
						1586.79	1586.76	0.0322	31.88	0.03	FYLAGNQEQEFLK
						1589.82	1589.81	0.0107	33.58	0.022	*EGSNILSGFAPEFLK
						1607.84	1607.82	0.0181	50.8	0.00089	EGSNILSGFAPEFLK
						1607.84	1607.82	0.0191	42.72	0.0019	EGSNILSGFAPEFLK
						1607.84	1607.82	0.0197	52.7	0.00079	EGSNILSGFAPEFLK
						1637.88	1637.88	0.0054	48.11	0.00095	ALPEEVIQHTFNLK
						1637.88	1637.88	0.006	33.35	0.013	ALPEEVIQHTFNLK
						1637.88	1637.88	0.006	48.83	0.00058	ALPEEVIQHTFNLK
						1637.9	1637.88	0.0272	94.87	1.1e-07	ALPEEVIQHTFNLK
						1637.91	1637.88	0.0278	90.07	3.1e-07	ALPEEVIQHTFNLK
						1637.91	1637.88	0.0328	80.48	1.4e-06	ALPEEVIQHTFNLK
						1642.82	1642.8	0.0228	68.73	2e-05	"FYLAGNQEQEFLK
						1642.82	1642.8	0.0258	45.92	0.0017	"FYLAGNQEQEFLK
						1642.83	1642.8	0.0266	53.62	0.00041	"FYLAGNQEQEFLK
						1644.84	1644.83	0.0136	36.96	0.02	NPFSFLVPPQESQR
						1741.86	1741.88	-0.0153	109.17	2.2e-07	RFYLAGNQEQEFLK
						1741.87	1741.88	-0.0115	91.68	3.2e-06	RFYLAGNQEQEFLK
						1741.87	1741.88	-0.0113	91.3	2.1e-06	RFYLAGNQEQEFLK
						1741.88	1741.88	0.0062	29.96	0.047	RFYLAGNQEQEFLK
						1741.89	1741.88	0.0107	31.55	0.027	RFYLAGNQEQEFLK
						1741.89	1741.88	0.0123	93.52	5.2e-06	RFYLAGNQEQEFLK
						1741.9	1741.88	0.0169	49.37	0.0098	RFYLAGNQEQEFLK
						1741.9	1741.88	0.0169	41.15	0.007	RFYLAGNQEQEFLK
						1741.9	1741.88	0.0173	66.11	0.00013	RFYLAGNQEQEFLK
						1741.9	1741.88	0.0183	63.37	0.00033	RFYLAGNQEQEFLK
						1741.9	1741.88	0.0235	61.36	0.0051	RFYLAGNQEQEFLK
						1741.91	1742.86	-0.9573	84.84	6.1e-05	RFYLAGNQEQEFLK
						1741.91	1741.88	0.0279	57.18	0.013	RFYLAGNQEQEFLK
						1741.91	1741.88	0.0341	93.9	2.6e-06	RFYLAGNQEQEFLK
						1741.91	1741.88	0.0343	99.21	4.4e-07	RFYLAGNQEQEFLK
						1741.91	1742.86	-0.9491	89.79	2e-05	RFYLAGNQEQEFLK
						1742.88	1742.86	0.0201	84.84	3.7e-06	RFYLAGNQEQEFLK
						1742.88	1742.86	0.0211	89.79	9.3e-07	RFYLAGNQEQEFLK
						1758.89	1758.87	0.0195	41.01	0.0071	NNPFSFLVPPQESQR
						1758.89	1758.87	0.0239	50.25	0.002	NNPFSFLVPPQESQR
						1771.88	1771.83	0.0521	67.13	0.0036	SREQPQQNECQIQK
						1771.88	1771.83	0.0563	63.35	0.0085	SREQPQQNECQIQK
						1798.93	1798.9	0.0289	94.9	6e-06	"RFYLAGNQEQEFLK
						1798.93	1798.9	0.0335	94.77	6.1e-06	"RFYLAGNQEQEFLK
						1798.94	1798.9	0.0355	91.68	5.5e-06	"RFYLAGNQEQEFLK
						1872.89	1872.91	-0.0206	69.13	5.9e-05	NNNPFSFLVPPQESQR
						1872.89	1872.91	-0.0186	68.8	0.0015	NNNPFSFLVPPQESQR
						1872.91	1872.91	-0.0048	68.79	0.0023	NNNPFSFLVPPQESQR
						1872.92	1872.91	0.0107	36.43	0.031	NNNPFSFLVPPQESQR
						1872.93	1872.91	0.0174	33.02	0.021	NNNPFSFLVPPQESQR
						1872.93	1872.91	0.0188	51.42	0.00066	NNNPFSFLVPPQESQR
						1872.93	1872.91	0.023	66.33	4.2e-05	NNNPFSFLVPPQESQR
						1873.91	1873.9	0.019	48.99	0.00081	NNNPFSFLVPPQESQR
						1873.92	1873.9	0.0246	65.98	3.1e-05	NNNPFSFLVPPQESQR
						1873.92	1873.9	0.0266	69.26	1.7e-05	NNNPFSFLVPPQESQR
						1873.93	1873.9	0.0308	69.24	2e-05	NNNPFSFLVPPQESQR
						1874.89	1873.9	0.9894	68.46	6.6e-06	NNNPFSFLVPPQESQR
						1875.94	1875.86	0.078	54.27	0.00024	NNNPFSFLVPPQESQR
						1875.94	1875.86	0.0808	53.88	0.00024	NNNPFSFLVPPQESQR
						1876.95	1876.99	-0.0402	57.71	0.00025	PEFLKEAFGVNMQIVR
						1876.95	1876.99	-0.0372	63.25	0.00011	PEFLKEAFGVNMQIVR
						1929.96	1929.93	0.0283	53.41	0.001	"NNNPFSFLVPPQESQR
						1930.9	1930.91	-0.0153	130.91	1.4e-10	NLQGENEEEDSGAIVTVK
						1930.9	1930.91	-0.0149	144.95	8.5e-12	NLQGENEEEDSGAIVTVK
						1930.9	1930.91	-0.0099	131.04	2e-10	NLQGENEEEDSGAIVTVK
						1930.9	1930.91	-0.0089	121.83	1e-09	NLQGENEEEDSGAIVTVK
						1930.9	1930.91	-0.0077	151.93	1.9e-12	NLQGENEEEDSGAIVTVK
						1930.92	1931.9	-0.9791	58.89	0.024	NLQGENEEEDSGAIVTVK
						1930.92	1930.91	0.0063	80.4	1.4e-06	NLQGENEEEDSGAIVTVK
						1930.93	1930.91	0.0139	125.65	9.8e-10	NLQGENEEEDSGAIVTVK
						1930.93	1930.91	0.0139	42.06	0.0027	NLQGENEEEDSGAIVTVK
						1930.93	1930.91	0.0147	90.74	1.3e-07	NLQGENEEEDSGAIVTVK
						1930.93	1930.91	0.0155	75.76	1.9e-06	NLQGENEEEDSGAIVTVK
						1930.93	1930.91	0.0217	30.02	0.0079	NLQGENEEEDSGAIVTVK
						1930.94	1930.91	0.0261	42.65	0.00085	NLQGENEEEDSGAIVTVK
						1930.94	1930.91	0.0305	79.25	3.5e-06	NLQGENEEEDSGAIVTVK
						1930.94	1930.91	0.0307	75.28	2.3e-06	NLQGENEEEDSGAIVTVK
						1930.95	1930.91	0.0339	85.59	5.9e-07	NLQGENEEEDSGAIVTVK
						1930.95	1930.91	0.0345	48.19	0.00047	NLQGENEEEDSGAIVTVK
						1930.95	1930.91	0.0371	147.97	4.9e-12	NLQGENEEEDSGAIVTVK
						1977.99	1978.97	-0.9884	58.93	0.023	RPSYTNGPQEIYIQQGK
						1978.01	1978.97	-0.9608	93.21	8.6e-06	RPSYTNGPQEIYIQQGK
						1978.02	1978.97	-0.9572	97.85	3e-06	RPSYTNGPQEIYIQQGK
						1978.02	1977.99	0.0324	110.94	3.8e-09	RPSYTNGPQEIYIQQGK
						1978.02	1977.99	0.034	100.88	3.3e-08	RPSYTNGPQEIYIQQGK
						1978.03	1977.99	0.0428	105.56	1.7e-08	RPSYTNGPQEIYIQQGK
						1978.96	1978.97	-0.0182	58.93	0.023	RPSYTNGPQEIYIQQGK
						1978.98	1978.97	0.001	93.21	8.6e-06	RPSYTNGPQEIYIQQGK
						1978.98	1978.97	0.0022	97.85	3e-06	RPSYTNGPQEIYIQQGK
						1978.98	1978.97	0.0022	59.45	0.02	RPSYTNGPQEIYIQQGK
						1978.98	1978.97	0.0042	88.38	1.6e-05	RPSYTNGPQEIYIQQGK
						1978.98	1978.97	0.0067	62.75	0.0096	RPSYTNGPQEIYIQQGK
						1980.98	1980.94	0.0368	54.31	0.00038	RPSYTNGPQEIYIQQGK
						1980.98	1980.94	0.0392	49.91	0.00023	RPSYTNGPQEIYIQQGK
						2065.13	2066.1	-0.9773	62.32	0.01	SLLNALPEEVIQHTFNLK
						2065.13	2065.12	0.0067	75.13	3.4e-06	SLLNALPEEVIQHTFNLK
						2065.13	2066.1	-0.9746	63.13	0.0087	SLLNALPEEVIQHTFNLK
						2065.13	2065.12	0.0131	52.63	0.00073	SLLNALPEEVIQHTFNLK
						2065.14	2065.12	0.0143	33.73	0.045	SLLNALPEEVIQHTFNLK
						2065.14	2065.12	0.0147	35.96	0.012	SLLNALPEEVIQHTFNLK
						2065.14	2065.12	0.0217	53.93	9e-05	SLLNALPEEVIQHTFNLK
						2152.06	2152.01	0.0502	75.49	4.5e-05	NFAVAAKSQSDNFEYVSFK
						2152.08	2152.01	0.0652	38.02	0.024	NFAVAAKSQSDNFEYVSFK
						2152.08	2152.01	0.0655	55.78	0.00032	NFAVAAKSQSDNFEYVSFK
						2161.01	2160.99	0.0234	116.83	1.4e-10	IYPGCPSTFEEPQQPQQR
						2161.01	2160.99	0.024	97.16	1.2e-08	IYPGCPSTFEEPQQPQQR
						2161.02	2160.99	0.0308	96.23	4.1e-08	IYPGCPSTFEEPQQPQQR
						2348.09	2348.08	0.01	54.55	0.00041	*QQEEENEGSNILSGFAPEFLK
						2348.09	2348.08	0.0118	62.27	6e-05	*QQEEENEGSNILSGFAPEFLK
						2348.1	2348.08	0.0157	56.77	0.00027	*QQEEENEGSNILSGFAPEFLK
						2348.12	2348.08	0.0348	99.56	2.5e-08	*QQEEENEGSNILSGFAPEFLK
						2348.12	2348.08	0.0404	98.93	1.5e-08	*QQEEENEGSNILSGFAPEFLK
						2348.12	2348.08	0.0426	78.01	1.1e-06	*QQEEENEGSNILSGFAPEFLK
						2348.13	2348.08	0.0458	93.87	3.8e-08	*QQEEENEGSNILSGFAPEFLK
						2348.13	2348.08	0.0462	106.51	3.6e-09	*QQEEENEGSNILSGFAPEFLK
						2348.13	2348.08	0.0498	75.7	3e-06	*QQEEENEGSNILSGFAPEFLK
						2365.1	2366.09	-0.9959	56.36	0.00021	QQEEENEGSNILSGFAPEFLK
						2365.11	2365.11	0.0053	84.47	9.5e-06	QQEEENEGSNILSGFAPEFLK
						2365.12	2365.11	0.0145	91.37	1.3e-07	QQEEENEGSNILSGFAPEFLK
						2365.13	2365.11	0.0183	82.53	8.5e-07	QQEEENEGSNILSGFAPEFLK
						2365.13	2365.11	0.0195	77.64	2.5e-06	QQEEENEGSNILSGFAPEFLK
						2365.13	2365.11	0.0207	80.87	1.2e-06	QQEEENEGSNILSGFAPEFLK
						2365.14	2365.11	0.0287	91.85	2.2e-07	QQEEENEGSNILSGFAPEFLK
						2365.14	2365.11	0.0305	50.8	0.00037	QQEEENEGSNILSGFAPEFLK
						2368.12	2368.06	0.0651	46.05	0.0015	QQEEENEGSNILSGFAPEFLK
						2368.13	2368.06	0.0717	56.36	0.00017	QQEEENEGSNILSGFAPEFLK
						2368.13	2368.06	0.0721	60.76	0.00022	QQEEENEGSNILSGFAPEFLK
						2400.28	2400.27	0.0087	52.27	0.0021	VFDGELQEGGVLIVPQNFAVAAK
						2400.28	2400.27	0.0132	53.67	0.005	VFDGELQEGGVLIVPQNFAVAAK
						2400.28	2400.27	0.0141	35.03	0.0058	VFDGELQEGGVLIVPQNFAVAAK
						2400.29	2400.27	0.0165	66.51	0.00027	VFDGELQEGGVLIVPQNFAVAAK
						2400.29	2400.27	0.0203	30.96	0.022	VFDGELQEGGVLIVPQNFAVAAK
						2400.3	2400.27	0.0279	67.09	0.00024	VFDGELQEGGVLIVPQNFAVAAK
						2478.26	2478.25	0.0172	93.47	3.7e-08	NAMFVPHYTLNANSIIYALNGR
						2478.27	2478.25	0.0202	117.47	2.8e-10	NAMFVPHYTLNANSIIYALNGR
						2478.27	2478.25	0.0235	125.46	1.6e-10	NAMFVPHYTLNANSIIYALNGR
						2479.23	2479.23	0.0019	90.24	6.5e-06	NAMFVPHYTLNANSIIYALNGR
						2479.25	2479.23	0.016	45.92	0.00056	NAMFVPHYTLNANSIIYALNGR
						2479.26	2479.23	0.0241	121.95	4.6e-11	NAMFVPHYTLNANSIIYALNGR
						2480.23	2480.22	0.01	116.19	2.3e-08	NAMFVPHYTLNANSIIYALNGR
						2535.27	2535.27	0.003	35.95	0.0073	"NAMFVPHYTLNANSIIYALNGR
						2550.22	2550.22	-0.0026	71.88	1.1e-05	GKQQEEENEGSNILSGFAPEFLK
						2550.23	2550.22	0.0055	68.76	1.5e-05	GKQQEEENEGSNILSGFAPEFLK
						2550.24	2550.22	0.0142	94.61	2.1e-07	GKQQEEENEGSNILSGFAPEFLK
						2550.24	2550.22	0.0193	53.87	0.0029	GKQQEEENEGSNILSGFAPEFLK
						2550.24	2550.22	0.0199	62.92	3e-05	GKQQEEENEGSNILSGFAPEFLK
						2550.24	2550.22	0.0208	57.04	0.0031	GKQQEEENEGSNILSGFAPEFLK
						2550.24	2550.22	0.0211	80.9	1.2e-05	GKQQEEENEGSNILSGFAPEFLK
						2550.25	2550.22	0.022	63.2	3.5e-05	GKQQEEENEGSNILSGFAPEFLK
						2550.25	2550.22	0.0244	65.87	0.0002	GKQQEEENEGSNILSGFAPEFLK
						2550.25	2550.22	0.0265	67.98	3.7e-05	GKQQEEENEGSNILSGFAPEFLK
						2550.25	2550.22	0.028	71.64	3.1e-05	GKQQEEENEGSNILSGFAPEFLK
						2550.25	2550.22	0.028	58.04	0.00025	GKQQEEENEGSNILSGFAPEFLK
						2550.25	2550.22	0.0307	94.39	9.3e-07	GKQQEEENEGSNILSGFAPEFLK
						2606.35	2606.34	0.0046	73.3	8.5e-06	KNAMFVPHYTLNANSIIYALNGR
						2606.35	2606.34	0.0049	61.03	1.8e-05	KNAMFVPHYTLNANSIIYALNGR
						2607.24	2607.25	-0.004	60.25	3.5e-05	"GKQQEEENEGSNILSGFAPEFLK
						2607.25	2608.23	-0.9814	53.42	0.00014	"GKQQEEENEGSNILSGFAPEFLK
						2607.27	2607.25	0.0242	28.77	0.023	"GKQQEEENEGSNILSGFAPEFLK
						2607.27	2608.23	-0.9595	56.22	6.8e-05	"GKQQEEENEGSNILSGFAPEFLK
						2666.21	2666.23	-0.0111	72.24	1.7e-06	GIFGMIYPGCPSTFEEPQQPQQR
						2666.23	2666.23	0.003	76.59	4.6e-07	GIFGMIYPGCPSTFEEPQQPQQR
						2666.23	2666.23	0.0051	90.27	6.3e-08	GIFGMIYPGCPSTFEEPQQPQQR
						2666.25	2666.23	0.0246	95.31	1.1e-08	GIFGMIYPGCPSTFEEPQQPQQR
						2666.25	2666.23	0.0258	89.63	3.4e-08	GIFGMIYPGCPSTFEEPQQPQQR
						2666.26	2666.23	0.0366	75.38	4.9e-07	GIFGMIYPGCPSTFEEPQQPQQR
						2682.25	2682.22	0.0305	52.9	0.00021	GIFGMIYPGCPSTFEEPQQPQQR
						2682.25	2682.22	0.0311	42.59	0.0018	GIFGMIYPGCPSTFEEPQQPQQR
						2682.26	2682.22	0.0398	49.56	0.00035	GIFGMIYPGCPSTFEEPQQPQQR
						2690.1	2690.08	0.0224	88.49	1.6e-07	KPQQEEDDDDEEEQPQCVETDK
						2690.1	2690.08	0.0227	103.39	8.5e-09	KPQQEEDDDDEEEQPQCVETDK
						2690.11	2690.08	0.0302	97.21	4e-08	KPQQEEDDDDEEEQPQCVETDK
						2723.26	2723.25	0.0098	27.16	0.015	"GIFGMIYPGCPSTFEEPQQPQQR
						2723.26	2723.25	0.0134	75.44	2e-06	"GIFGMIYPGCPSTFEEPQQPQQR
						2723.27	2723.25	0.0179	72.4	2e-06	"GIFGMIYPGCPSTFEEPQQPQQR
						2723.27	2723.25	0.023	70.77	3.2e-06	"GIFGMIYPGCPSTFEEPQQPQQR
						2723.27	2723.25	0.0266	33.83	0.0038	"GIFGMIYPGCPSTFEEPQQPQQR
						2723.28	2723.25	0.0332	40.88	0.00089	"GIFGMIYPGCPSTFEEPQQPQQR
						2723.3	2723.25	0.0488	48.12	0.00032	"GIFGMIYPGCPSTFEEPQQPQQR
						2723.3	2723.25	0.0533	39.27	0.0013	"GIFGMIYPGCPSTFEEPQQPQQR
						2885.31	2885.42	-0.1061	47.16	0.00097	"GVNMQIVRNLQGENEEEDSGAIVTVK
						2885.31	2885.42	-0.1052	27.07	0.032	"GVNMQIVRNLQGENEEEDSGAIVTVK
						2902.39	2902.4	-0.0087	32.33	0.026	"GVNMQIVRNLQGENEEEDSGAIVTVK
						2986.44	2986.46	-0.0197	38.4	0.015	IESEGGLIETWNPNNKPFQCAGVALSR
						2986.45	2987.44	-0.9926	47.86	0.036	IESEGGLIETWNPNNKPFQCAGVALSR
						2986.46	2986.46	0.0028	73.95	1.2e-06	IESEGGLIETWNPNNKPFQCAGVALSR
						2986.47	2986.46	0.0058	143.13	4e-12	IESEGGLIETWNPNNKPFQCAGVALSR
						2986.47	2986.46	0.0115	165.91	8.5e-15	IESEGGLIETWNPNNKPFQCAGVALSR
						2986.47	2986.46	0.0115	98.77	5.9e-09	IESEGGLIETWNPNNKPFQCAGVALSR
						2986.48	2986.46	0.0145	136.12	2.9e-12	IESEGGLIETWNPNNKPFQCAGVALSR
						2986.48	2986.46	0.0151	108.28	1.4e-09	IESEGGLIETWNPNNKPFQCAGVALSR
						2986.48	2986.46	0.0157	97.09	6.4e-08	IESEGGLIETWNPNNKPFQCAGVALSR
						2986.48	2986.46	0.0169	125.27	2.3e-10	IESEGGLIETWNPNNKPFQCAGVALSR
						2986.48	2986.46	0.0175	90.48	1.1e-07	IESEGGLIETWNPNNKPFQCAGVALSR
						2986.48	2986.46	0.0184	90.68	4.5e-08	IESEGGLIETWNPNNKPFQCAGVALSR
						2986.48	2986.46	0.0196	138.88	4.6e-12	IESEGGLIETWNPNNKPFQCAGVALSR
						2986.48	2986.46	0.0217	210.6	1.2e-17	IESEGGLIETWNPNNKPFQCAGVALSR
						2986.49	2986.46	0.0247	125.89	3e-11	IESEGGLIETWNPNNKPFQCAGVALSR
						2986.49	2986.46	0.0328	214.25	5.2e-18	IESEGGLIETWNPNNKPFQCAGVALSR
						2986.5	2986.46	0.035	33.4	0.018	IESEGGLIETWNPNNKPFQCAGVALSR
						2986.5	2986.46	0.0382	46.39	0.0013	IESEGGLIETWNPNNKPFQCAGVALSR
						2986.51	2986.46	0.0448	214.45	4e-18	IESEGGLIETWNPNNKPFQCAGVALSR
						2989.5	2989.41	0.0868	31.48	0.05	IESEGGLIETWNPNNKPFQCAGVALSR
						2989.51	2989.41	0.0928	31.68	0.046	IESEGGLIETWNPNNKPFQCAGVALSR
						3005.55	3005.54	0.0154	37.63	0.012	SSPDIYNPQAGSITTATSLDFPALWLLK
						3043.51	3043.48	0.0263	33.05	0.0094	"IESEGGLIETWNPNNKPFQCAGVALSR
						3090.57	3090.57	0.0015	57.94	6.9e-05	TNDRPSIGNLAGANSLLNALPEEVIQHTF
						3174.53	3174.51	0.0193	120.17	5.9e-09	YNNEDTPVVAVSIIDTNSLENQLDQMPR
						3191.3	3191.29	0.014	129.22	2.5e-11	KPQQEEDDDDEEEQPQCVETDKGCQR
						3191.31	3191.29	0.017	87.97	1.7e-07	KPQQEEDDDDEEEQPQCVETDKGCQR
						3191.31	3191.29	0.0251	143.5	1.2e-12	KPQQEEDDDDEEEQPQCVETDKGCQR
						3191.32	3191.29	0.0306	100.69	1.4e-08	KPQQEEDDDDEEEQPQCVETDKGCQR
						3191.32	3191.29	0.0314	109.67	2.7e-09	KPQQEEDDDDEEEQPQCVETDKGCQR
						3191.33	3191.29	0.0394	128.94	4e-11	KPQQEEDDDDEEEQPQCVETDKGCQR
						3404.74	3404.72	0.0191	36.35	0.018	"NDRPSIGNLAGANSLLNALPEEVIQHTFNLK
						3445.75	3445.8	-0.0488	126.8	1.2e-10	TNDRPSIGNLAGANSLLNALPEEVIQHTFNLK
						3445.77	3445.8	-0.0238	46.56	0.00061	TNDRPSIGNLAGANSLLNALPEEVIQHTFNLK
						3445.78	3445.8	-0.0196	116.57	9.7e-10	TNDRPSIGNLAGANSLLNALPEEVIQHTFNLK
						3445.78	3445.8	-0.0172	66.33	6e-06	TNDRPSIGNLAGANSLLNALPEEVIQHTFNLK
						3445.79	3445.8	-0.0064	115.71	2.4e-08	TNDRPSIGNLAGANSLLNALPEEVIQHTFNLK
						3445.79	3445.8	-0.0024	111.97	4.3e-09	TNDRPSIGNLAGANSLLNALPEEVIQHTFNLK
						3445.8	3445.8	0.0012	81.24	2.6e-06	TNDRPSIGNLAGANSLLNALPEEVIQHTFNLK
						3445.8	3445.8	0.0035	44.09	0.0015	TNDRPSIGNLAGANSLLNALPEEVIQHTFNLK
						3445.8	3445.8	0.0048	65.94	5.3e-05	TNDRPSIGNLAGANSLLNALPEEVIQHTFNLK
						3445.8	3445.8	0.0068	116.51	2e-09	TNDRPSIGNLAGANSLLNALPEEVIQHTFNLK
						3445.81	3445.8	0.012	146.07	3.6e-12	TNDRPSIGNLAGANSLLNALPEEVIQHTFNLK
						3445.81	3446.78	-0.9691	46.6	0.0016	TNDRPSIGNLAGANSLLNALPEEVIQHTFNLK
						3445.81	3445.8	0.0176	104.54	9.5e-08	TNDRPSIGNLAGANSLLNALPEEVIQHTFNLK
						3445.81	3445.8	0.0188	142.39	8.5e-12	TNDRPSIGNLAGANSLLNALPEEVIQHTFNLK
						3445.82	3445.8	0.0212	152.41	6.7e-13	TNDRPSIGNLAGANSLLNALPEEVIQHTFNLK
						3445.82	3445.8	0.0215	120.75	7.9e-11	TNDRPSIGNLAGANSLLNALPEEVIQHTFNLK
						3445.82	3445.8	0.022	136.78	1.1e-11	TNDRPSIGNLAGANSLLNALPEEVIQHTFNLK
						3445.82	3445.8	0.0224	101.66	7.8e-08	TNDRPSIGNLAGANSLLNALPEEVIQHTFNLK
						3445.82	3445.8	0.0269	125.34	6.6e-11	TNDRPSIGNLAGANSLLNALPEEVIQHTFNLK
						3445.82	3445.8	0.0281	119.13	1.7e-10	TNDRPSIGNLAGANSLLNALPEEVIQHTFNLK
						3445.82	3445.8	0.0296	114.58	4.5e-09	TNDRPSIGNLAGANSLLNALPEEVIQHTFNLK
						3445.83	3445.8	0.0302	141.64	2.4e-12	TNDRPSIGNLAGANSLLNALPEEVIQHTFNLK
						3445.83	3445.8	0.0323	96.13	3.2e-08	TNDRPSIGNLAGANSLLNALPEEVIQHTFNLK
						3445.83	3445.8	0.0356	121.21	1.3e-10	TNDRPSIGNLAGANSLLNALPEEVIQHTFNLK
						3446.78	3445.8	0.9876	81.24	4.7e-06	TNDRPSIGNLAGANSLLNALPEEVIQHTFNLK
						3446.79	3445.8	0.9928	111.97	4.5e-09	TNDRPSIGNLAGANSLLNALPEEVIQHTFNLK
						3446.79	3445.8	0.9936	65.94	0.00012	TNDRPSIGNLAGANSLLNALPEEVIQHTFNLK
						3446.79	3446.78	0.0148	102.08	7.2e-07	TNDRPSIGNLAGANSLLNALPEEVIQHTFNLK
						3446.8	3446.78	0.0168	104.54	2.7e-08	TNDRPSIGNLAGANSLLNALPEEVIQHTFNLK
						3446.8	3446.78	0.0188	47.7	0.00056	TNDRPSIGNLAGANSLLNALPEEVIQHTFNLK
						3446.8	3446.78	0.0218	47.66	0.00027	TNDRPSIGNLAGANSLLNALPEEVIQHTFNLK
						3446.81	3446.78	0.0344	59.65	0.00012	TNDRPSIGNLAGANSLLNALPEEVIQHTFNLK
						3643.82	3643.8	0.0141	87.88	1.8e-05	*QNIGQNSSPDIYNPQAGSITTATSLDFPALWLLK
						3659.85	3660.83	-0.9835	131.79	7e-10	QNIGQNSSPDIYNPQAGSITTATSLDFPALWLLK
						3659.86	3659.85	0.0086	157.45	2.4e-14	QNIGQNSSPDIYNPQAGSITTATSLDFPALWLLK
						3659.88	3659.85	0.0294	155.14	4.7e-14	QNIGQNSSPDIYNPQAGSITTATSLDFPALWLLK
						3660.86	3660.83	0.0263	98.1	2.3e-08	QNIGQNSSPDIYNPQAGSITTATSLDFPALWLLK
						3929.04	3929.03	0.0105	145.62	2.1e-13	LRQNIGQNSSPDIYNPQAGSITTATSLDFPALWLLK
						3929.04	3929.03	0.0114	130.42	4.7e-12	LRQNIGQNSSPDIYNPQAGSITTATSLDFPALWLLK
		A0A0R0KRW0	Cupin type-1 domain-containing protein	9044	43672	840.413	840.409	0.0045	42.48	0.039	PPQESQR
						840.415	840.409	0.0059	42.46	0.04	PPQESQR
						993.523	993.524	-0.0011	71.33	0.00021	LSAQYGSLR
						993.526	993.524	0.0019	72.68	0.0008	LSAQYGSLR
						993.527	993.524	0.0023	49.8	0.0045	LSAQYGSLR
						1121.64	1121.62	0.0178	53.25	0.046	LSAQYGSLRK
						1148.52	1148.54	-0.0199	60.07	0.0013	VFDGELQEGGV
						1148.52	1148.54	-0.0139	60.31	0.002	VFDGELQEGGV
						1148.57	1148.54	0.0309	57.72	0.002	VFDGELQEGGV
						1148.57	1148.54	0.0327	48.47	0.0021	VFDGELQEGGV
						1148.57	1148.54	0.0335	55.66	0.0051	VFDGELQEGGV
						1194.5	1194.54	-0.0334	46.47	0.025	GIDETICTMR
						1194.53	1194.54	-0.0078	56.65	0.041	GIDETICTMR
						1195.53	1194.54	0.9878	46.47	0.032	GIDETICTMR
						1220.68	1220.68	0.0026	56.09	0.0023	ILSGFAPEFLK
						1251.58	1251.56	0.0253	46.57	0.0049	"GIDETICTMR
						1262.65	1262.64	0.0043	32.84	0.049	EAFGVNMQIVR
						1262.65	1262.64	0.0047	45.96	0.0023	EAFGVNMQIVR
						1262.65	1262.64	0.0079	31.75	0.033	EAFGVNMQIVR
						1262.65	1262.64	0.0093	38.05	0.0039	EAFGVNMQIVR
						1262.65	1262.64	0.0107	41.53	0.003	EAFGVNMQIVR
						1262.66	1262.64	0.0117	45.83	0.0011	EAFGVNMQIVR
						1262.66	1262.64	0.0135	52.29	0.0015	EAFGVNMQIVR
						1262.66	1262.64	0.0141	51.87	0.0038	EAFGVNMQIVR
						1262.66	1262.64	0.0143	54.75	0.0013	EAFGVNMQIVR
						1262.66	1262.64	0.0151	44.74	0.011	EAFGVNMQIVR
						1262.66	1262.64	0.0163	55.89	0.00063	EAFGVNMQIVR
						1262.67	1262.64	0.0269	78.61	2.1e-05	EAFGVNMQIVR
						1262.67	1262.64	0.0285	78.63	2.1e-05	EAFGVNMQIVR
						1262.67	1262.64	0.0309	78.32	2.1e-05	EAFGVNMQIVR
						1278.65	1278.64	0.016	60.72	0.00042	EAFGVNMQIVR
						1278.66	1278.64	0.0198	53.71	0.0035	EAFGVNMQIVR
						1278.66	1278.64	0.0214	56.96	0.0027	EAFGVNMQIVR
						1421.77	1421.76	0.0132	58.27	0.00042	SNILSGFAPEFLK
						1421.77	1421.76	0.0144	59.11	0.00069	SNILSGFAPEFLK
						1421.77	1421.76	0.0144	57.91	0.0007	SNILSGFAPEFLK
						1449.61	1449.64	-0.0362	81.86	1.8e-06	SQSDNFEYVSFK
						1449.61	1449.64	-0.0346	81.85	2.5e-06	SQSDNFEYVSFK
						1449.61	1449.64	-0.0312	81.54	1.2e-06	SQSDNFEYVSFK
						1449.61	1449.64	-0.0308	81.57	1.5e-06	SQSDNFEYVSFK
						1449.61	1449.64	-0.0298	81.87	1.2e-06	SQSDNFEYVSFK
						1449.65	1449.64	0.0112	81.48	2e-06	SQSDNFEYVSFK
						1449.65	1449.64	0.0124	75.69	2.3e-05	SQSDNFEYVSFK
						1449.66	1449.64	0.0196	29.29	0.023	SQSDNFEYVSFK
						1449.67	1449.64	0.024	75.83	3.5e-06	SQSDNFEYVSFK
						1451.63	1451.61	0.025	44.72	0.003	SQSDNFEYVSFK
						1451.63	1451.61	0.0254	44.42	0.0023	SQSDNFEYVSFK
						1493.69	1493.69	0.009	68.33	6.1e-05	YQQQQQGGSQSQK
						1493.7	1493.69	0.0094	33.57	0.0073	YQQQQQGGSQSQK
						1493.7	1493.69	0.0114	50.41	0.0027	YQQQQQGGSQSQK
						1506.7	1506.66	0.0336	36.52	0.0056	"SQSDNFEYVSFK
						1506.7	1506.66	0.038	34.15	0.01	"SQSDNFEYVSFK
						1585.79	1585.78	0.0168	41.77	0.0013	FYLAGNQEQEFLK
						1585.8	1585.78	0.018	56.53	0.00015	FYLAGNQEQEFLK
						1585.8	1585.78	0.0194	51.33	0.0011	FYLAGNQEQEFLK
						1585.8	1585.78	0.02	48.17	0.00079	FYLAGNQEQEFLK
						1585.8	1585.78	0.021	50	0.0014	FYLAGNQEQEFLK
						1585.8	1585.78	0.0216	42.54	0.0022	FYLAGNQEQEFLK
						1585.8	1585.78	0.0218	68.9	9.6e-06	FYLAGNQEQEFLK
						1585.8	1585.78	0.0218	41.82	0.004	FYLAGNQEQEFLK
						1586.79	1586.76	0.0244	49.21	0.0012	FYLAGNQEQEFLK
						1586.79	1586.76	0.0298	32.91	0.028	FYLAGNQEQEFLK
						1586.79	1586.76	0.0322	31.88	0.03	FYLAGNQEQEFLK
						1589.82	1589.81	0.0107	33.58	0.022	*EGSNILSGFAPEFLK
						1607.84	1607.82	0.0181	50.8	0.00089	EGSNILSGFAPEFLK
						1607.84	1607.82	0.0191	42.72	0.0019	EGSNILSGFAPEFLK
						1607.84	1607.82	0.0197	52.7	0.00079	EGSNILSGFAPEFLK
						1637.88	1637.88	0.0054	48.11	0.00095	ALPEEVIQHTFNLK
						1637.88	1637.88	0.006	33.35	0.013	ALPEEVIQHTFNLK
						1637.88	1637.88	0.006	48.83	0.00058	ALPEEVIQHTFNLK
						1637.9	1637.88	0.0272	94.87	1.1e-07	ALPEEVIQHTFNLK
						1637.91	1637.88	0.0278	90.07	3.1e-07	ALPEEVIQHTFNLK
						1637.91	1637.88	0.0328	80.48	1.4e-06	ALPEEVIQHTFNLK
						1642.82	1642.8	0.0228	68.73	2e-05	"FYLAGNQEQEFLK
						1642.82	1642.8	0.0258	45.92	0.0017	"FYLAGNQEQEFLK
						1642.83	1642.8	0.0266	53.62	0.00041	"FYLAGNQEQEFLK
						1644.84	1644.83	0.0136	36.96	0.02	NPFSFLVPPQESQR
						1741.86	1741.88	-0.0153	109.17	2.2e-07	RFYLAGNQEQEFLK
						1741.87	1741.88	-0.0115	91.68	3.2e-06	RFYLAGNQEQEFLK
						1741.87	1741.88	-0.0113	91.3	2.1e-06	RFYLAGNQEQEFLK
						1741.88	1741.88	0.0062	29.96	0.047	RFYLAGNQEQEFLK
						1741.89	1741.88	0.0107	31.55	0.027	RFYLAGNQEQEFLK
						1741.89	1741.88	0.0123	93.52	5.2e-06	RFYLAGNQEQEFLK
						1741.9	1741.88	0.0169	49.37	0.0098	RFYLAGNQEQEFLK
						1741.9	1741.88	0.0169	41.15	0.007	RFYLAGNQEQEFLK
						1741.9	1741.88	0.0173	66.11	0.00013	RFYLAGNQEQEFLK
						1741.9	1741.88	0.0183	63.37	0.00033	RFYLAGNQEQEFLK
						1741.9	1741.88	0.0235	61.36	0.0051	RFYLAGNQEQEFLK
						1741.91	1742.86	-0.9573	84.84	6.1e-05	RFYLAGNQEQEFLK
						1741.91	1741.88	0.0279	57.18	0.013	RFYLAGNQEQEFLK
						1741.91	1741.88	0.0341	93.9	2.6e-06	RFYLAGNQEQEFLK
						1741.91	1741.88	0.0343	99.21	4.4e-07	RFYLAGNQEQEFLK
						1741.91	1742.86	-0.9491	89.79	2e-05	RFYLAGNQEQEFLK
						1742.88	1742.86	0.0201	84.84	3.7e-06	RFYLAGNQEQEFLK
						1742.88	1742.86	0.0211	89.79	9.3e-07	RFYLAGNQEQEFLK
						1758.89	1758.87	0.0195	41.01	0.0071	NNPFSFLVPPQESQR
						1758.89	1758.87	0.0239	50.25	0.002	NNPFSFLVPPQESQR
						1798.93	1798.9	0.0289	94.9	6e-06	"RFYLAGNQEQEFLK
						1798.93	1798.9	0.0335	94.77	6.1e-06	"RFYLAGNQEQEFLK
						1798.94	1798.9	0.0355	91.68	5.5e-06	"RFYLAGNQEQEFLK
						1872.89	1872.91	-0.0206	69.13	5.9e-05	NNNPFSFLVPPQESQR
						1872.89	1872.91	-0.0186	68.8	0.0015	NNNPFSFLVPPQESQR
						1872.91	1872.91	-0.0048	68.79	0.0023	NNNPFSFLVPPQESQR
						1872.92	1872.91	0.0107	36.43	0.031	NNNPFSFLVPPQESQR
						1872.93	1872.91	0.0174	33.02	0.021	NNNPFSFLVPPQESQR
						1872.93	1872.91	0.0188	51.42	0.00066	NNNPFSFLVPPQESQR
						1872.93	1872.91	0.023	66.33	4.2e-05	NNNPFSFLVPPQESQR
						1873.91	1873.9	0.019	48.99	0.00081	NNNPFSFLVPPQESQR
						1873.92	1873.9	0.0246	65.98	3.1e-05	NNNPFSFLVPPQESQR
						1873.92	1873.9	0.0266	69.26	1.7e-05	NNNPFSFLVPPQESQR
						1873.93	1873.9	0.0308	69.24	2e-05	NNNPFSFLVPPQESQR
						1874.89	1873.9	0.9894	68.46	6.6e-06	NNNPFSFLVPPQESQR
						1875.94	1875.86	0.078	54.27	0.00024	NNNPFSFLVPPQESQR
						1875.94	1875.86	0.0808	53.88	0.00024	NNNPFSFLVPPQESQR
						1876.95	1876.99	-0.0402	57.71	0.00025	PEFLKEAFGVNMQIVR
						1876.95	1876.99	-0.0372	63.25	0.00011	PEFLKEAFGVNMQIVR
						1929.96	1929.93	0.0283	53.41	0.001	"NNNPFSFLVPPQESQR
						1930.9	1930.91	-0.0153	130.91	1.4e-10	NLQGENEEEDSGAIVTVK
						1930.9	1930.91	-0.0149	144.95	8.5e-12	NLQGENEEEDSGAIVTVK
						1930.9	1930.91	-0.0099	131.04	2e-10	NLQGENEEEDSGAIVTVK
						1930.9	1930.91	-0.0089	121.83	1e-09	NLQGENEEEDSGAIVTVK
						1930.9	1930.91	-0.0077	151.93	1.9e-12	NLQGENEEEDSGAIVTVK
						1930.92	1931.9	-0.9791	58.89	0.024	NLQGENEEEDSGAIVTVK
						1930.92	1930.91	0.0063	80.4	1.4e-06	NLQGENEEEDSGAIVTVK
						1930.93	1930.91	0.0139	125.65	9.8e-10	NLQGENEEEDSGAIVTVK
						1930.93	1930.91	0.0139	42.06	0.0027	NLQGENEEEDSGAIVTVK
						1930.93	1930.91	0.0147	90.74	1.3e-07	NLQGENEEEDSGAIVTVK
						1930.93	1930.91	0.0155	75.76	1.9e-06	NLQGENEEEDSGAIVTVK
						1930.93	1930.91	0.0217	30.02	0.0079	NLQGENEEEDSGAIVTVK
						1930.94	1930.91	0.0261	42.65	0.00085	NLQGENEEEDSGAIVTVK
						1930.94	1930.91	0.0305	79.25	3.5e-06	NLQGENEEEDSGAIVTVK
						1930.94	1930.91	0.0307	75.28	2.3e-06	NLQGENEEEDSGAIVTVK
						1930.95	1930.91	0.0339	85.59	5.9e-07	NLQGENEEEDSGAIVTVK
						1930.95	1930.91	0.0345	48.19	0.00047	NLQGENEEEDSGAIVTVK
						1930.95	1930.91	0.0371	147.97	4.9e-12	NLQGENEEEDSGAIVTVK
						2065.13	2066.1	-0.9773	62.32	0.01	SLLNALPEEVIQHTFNLK
						2065.13	2065.12	0.0067	75.13	3.4e-06	SLLNALPEEVIQHTFNLK
						2065.13	2066.1	-0.9746	63.13	0.0087	SLLNALPEEVIQHTFNLK
						2065.13	2065.12	0.0131	52.63	0.00073	SLLNALPEEVIQHTFNLK
						2065.14	2065.12	0.0143	33.73	0.045	SLLNALPEEVIQHTFNLK
						2065.14	2065.12	0.0147	35.96	0.012	SLLNALPEEVIQHTFNLK
						2065.14	2065.12	0.0217	53.93	9e-05	SLLNALPEEVIQHTFNLK
						2152.06	2152.01	0.0502	75.49	4.5e-05	NFAVAAKSQSDNFEYVSFK
						2152.08	2152.01	0.0652	38.02	0.024	NFAVAAKSQSDNFEYVSFK
						2152.08	2152.01	0.0655	55.78	0.00032	NFAVAAKSQSDNFEYVSFK
						2348.09	2348.08	0.01	54.55	0.00041	*QQEEENEGSNILSGFAPEFLK
						2348.09	2348.08	0.0118	62.27	6e-05	*QQEEENEGSNILSGFAPEFLK
						2348.1	2348.08	0.0157	56.77	0.00027	*QQEEENEGSNILSGFAPEFLK
						2348.12	2348.08	0.0348	99.56	2.5e-08	*QQEEENEGSNILSGFAPEFLK
						2348.12	2348.08	0.0404	98.93	1.5e-08	*QQEEENEGSNILSGFAPEFLK
						2348.12	2348.08	0.0426	78.01	1.1e-06	*QQEEENEGSNILSGFAPEFLK
						2348.13	2348.08	0.0458	93.87	3.8e-08	*QQEEENEGSNILSGFAPEFLK
						2348.13	2348.08	0.0462	106.51	3.6e-09	*QQEEENEGSNILSGFAPEFLK
						2348.13	2348.08	0.0498	75.7	3e-06	*QQEEENEGSNILSGFAPEFLK
						2365.1	2366.09	-0.9959	56.36	0.00021	QQEEENEGSNILSGFAPEFLK
						2365.11	2365.11	0.0053	84.47	9.5e-06	QQEEENEGSNILSGFAPEFLK
						2365.12	2365.11	0.0145	91.37	1.3e-07	QQEEENEGSNILSGFAPEFLK
						2365.13	2365.11	0.0183	82.53	8.5e-07	QQEEENEGSNILSGFAPEFLK
						2365.13	2365.11	0.0195	77.64	2.5e-06	QQEEENEGSNILSGFAPEFLK
						2365.13	2365.11	0.0207	80.87	1.2e-06	QQEEENEGSNILSGFAPEFLK
						2365.14	2365.11	0.0287	91.85	2.2e-07	QQEEENEGSNILSGFAPEFLK
						2365.14	2365.11	0.0305	50.8	0.00037	QQEEENEGSNILSGFAPEFLK
						2368.12	2368.06	0.0651	46.05	0.0015	QQEEENEGSNILSGFAPEFLK
						2368.13	2368.06	0.0717	56.36	0.00017	QQEEENEGSNILSGFAPEFLK
						2368.13	2368.06	0.0721	60.76	0.00022	QQEEENEGSNILSGFAPEFLK
						2400.28	2400.27	0.0087	52.27	0.0021	VFDGELQEGGVLIVPQNFAVAAK
						2400.28	2400.27	0.0132	53.67	0.005	VFDGELQEGGVLIVPQNFAVAAK
						2400.28	2400.27	0.0141	35.03	0.0058	VFDGELQEGGVLIVPQNFAVAAK
						2400.29	2400.27	0.0165	66.51	0.00027	VFDGELQEGGVLIVPQNFAVAAK
						2400.29	2400.27	0.0203	30.96	0.022	VFDGELQEGGVLIVPQNFAVAAK
						2400.3	2400.27	0.0279	67.09	0.00024	VFDGELQEGGVLIVPQNFAVAAK
						2478.26	2478.25	0.0172	93.47	3.7e-08	NAMFVPHYTLNANSIIYALNGR
						2478.27	2478.25	0.0202	117.47	2.8e-10	NAMFVPHYTLNANSIIYALNGR
						2478.27	2478.25	0.0235	125.46	1.6e-10	NAMFVPHYTLNANSIIYALNGR
						2479.23	2479.23	0.0019	90.24	6.5e-06	NAMFVPHYTLNANSIIYALNGR
						2479.25	2479.23	0.016	45.92	0.00056	NAMFVPHYTLNANSIIYALNGR
						2479.26	2479.23	0.0241	121.95	4.6e-11	NAMFVPHYTLNANSIIYALNGR
						2480.23	2480.22	0.01	116.19	2.3e-08	NAMFVPHYTLNANSIIYALNGR
						2535.27	2535.27	0.003	35.95	0.0073	"NAMFVPHYTLNANSIIYALNGR
						2550.22	2550.22	-0.0026	71.88	1.1e-05	GKQQEEENEGSNILSGFAPEFLK
						2550.23	2550.22	0.0055	68.76	1.5e-05	GKQQEEENEGSNILSGFAPEFLK
						2550.24	2550.22	0.0142	94.61	2.1e-07	GKQQEEENEGSNILSGFAPEFLK
						2550.24	2550.22	0.0193	53.87	0.0029	GKQQEEENEGSNILSGFAPEFLK
						2550.24	2550.22	0.0199	62.92	3e-05	GKQQEEENEGSNILSGFAPEFLK
						2550.24	2550.22	0.0208	57.04	0.0031	GKQQEEENEGSNILSGFAPEFLK
						2550.24	2550.22	0.0211	80.9	1.2e-05	GKQQEEENEGSNILSGFAPEFLK
						2550.25	2550.22	0.022	63.2	3.5e-05	GKQQEEENEGSNILSGFAPEFLK
						2550.25	2550.22	0.0244	65.87	0.0002	GKQQEEENEGSNILSGFAPEFLK
						2550.25	2550.22	0.0265	67.98	3.7e-05	GKQQEEENEGSNILSGFAPEFLK
						2550.25	2550.22	0.028	71.64	3.1e-05	GKQQEEENEGSNILSGFAPEFLK
						2550.25	2550.22	0.028	58.04	0.00025	GKQQEEENEGSNILSGFAPEFLK
						2550.25	2550.22	0.0307	94.39	9.3e-07	GKQQEEENEGSNILSGFAPEFLK
						2606.35	2606.34	0.0046	73.3	8.5e-06	KNAMFVPHYTLNANSIIYALNGR
						2606.35	2606.34	0.0049	61.03	1.8e-05	KNAMFVPHYTLNANSIIYALNGR
						2607.24	2607.25	-0.004	60.25	3.5e-05	"GKQQEEENEGSNILSGFAPEFLK
						2607.25	2608.23	-0.9814	53.42	0.00014	"GKQQEEENEGSNILSGFAPEFLK
						2607.27	2607.25	0.0242	28.77	0.023	"GKQQEEENEGSNILSGFAPEFLK
						2607.27	2608.23	-0.9595	56.22	6.8e-05	"GKQQEEENEGSNILSGFAPEFLK
						2690.1	2690.08	0.0224	88.49	1.6e-07	KPQQEEDDDDEEEQPQCVETDK
						2690.1	2690.08	0.0227	103.39	8.5e-09	KPQQEEDDDDEEEQPQCVETDK
						2690.11	2690.08	0.0302	97.21	4e-08	KPQQEEDDDDEEEQPQCVETDK
						2885.31	2885.42	-0.1061	47.16	0.00097	"GVNMQIVRNLQGENEEEDSGAIVTVK
						2885.31	2885.42	-0.1052	27.07	0.032	"GVNMQIVRNLQGENEEEDSGAIVTVK
						2902.39	2902.4	-0.0087	32.33	0.026	"GVNMQIVRNLQGENEEEDSGAIVTVK
						3005.55	3005.54	0.0154	37.63	0.012	SSPDIYNPQAGSITTATSLDFPALWLLK
						3090.57	3090.57	0.0015	57.94	6.9e-05	TNDRPSIGNLAGANSLLNALPEEVIQHTF
						3174.53	3174.51	0.0193	120.17	5.9e-09	YNNEDTPVVAVSIIDTNSLENQLDQMPR
						3191.3	3191.29	0.014	129.22	2.5e-11	KPQQEEDDDDEEEQPQCVETDKGCQR
						3191.31	3191.29	0.017	87.97	1.7e-07	KPQQEEDDDDEEEQPQCVETDKGCQR
						3191.31	3191.29	0.0251	143.5	1.2e-12	KPQQEEDDDDEEEQPQCVETDKGCQR
						3191.32	3191.29	0.0306	100.69	1.4e-08	KPQQEEDDDDEEEQPQCVETDKGCQR
						3191.32	3191.29	0.0314	109.67	2.7e-09	KPQQEEDDDDEEEQPQCVETDKGCQR
						3191.33	3191.29	0.0394	128.94	4e-11	KPQQEEDDDDEEEQPQCVETDKGCQR
						3404.74	3404.72	0.0191	36.35	0.018	"NDRPSIGNLAGANSLLNALPEEVIQHTFNLK
						3445.75	3445.8	-0.0488	126.8	1.2e-10	TNDRPSIGNLAGANSLLNALPEEVIQHTFNLK
						3445.77	3445.8	-0.0238	46.56	0.00061	TNDRPSIGNLAGANSLLNALPEEVIQHTFNLK
						3445.78	3445.8	-0.0196	116.57	9.7e-10	TNDRPSIGNLAGANSLLNALPEEVIQHTFNLK
						3445.78	3445.8	-0.0172	66.33	6e-06	TNDRPSIGNLAGANSLLNALPEEVIQHTFNLK
						3445.79	3445.8	-0.0064	115.71	2.4e-08	TNDRPSIGNLAGANSLLNALPEEVIQHTFNLK
						3445.79	3445.8	-0.0024	111.97	4.3e-09	TNDRPSIGNLAGANSLLNALPEEVIQHTFNLK
						3445.8	3445.8	0.0012	81.24	2.6e-06	TNDRPSIGNLAGANSLLNALPEEVIQHTFNLK
						3445.8	3445.8	0.0035	44.09	0.0015	TNDRPSIGNLAGANSLLNALPEEVIQHTFNLK
						3445.8	3445.8	0.0048	65.94	5.3e-05	TNDRPSIGNLAGANSLLNALPEEVIQHTFNLK
						3445.8	3445.8	0.0068	116.51	2e-09	TNDRPSIGNLAGANSLLNALPEEVIQHTFNLK
						3445.81	3445.8	0.012	146.07	3.6e-12	TNDRPSIGNLAGANSLLNALPEEVIQHTFNLK
						3445.81	3446.78	-0.9691	46.6	0.0016	TNDRPSIGNLAGANSLLNALPEEVIQHTFNLK
						3445.81	3445.8	0.0176	104.54	9.5e-08	TNDRPSIGNLAGANSLLNALPEEVIQHTFNLK
						3445.81	3445.8	0.0188	142.39	8.5e-12	TNDRPSIGNLAGANSLLNALPEEVIQHTFNLK
						3445.82	3445.8	0.0212	152.41	6.7e-13	TNDRPSIGNLAGANSLLNALPEEVIQHTFNLK
						3445.82	3445.8	0.0215	120.75	7.9e-11	TNDRPSIGNLAGANSLLNALPEEVIQHTFNLK
						3445.82	3445.8	0.022	136.78	1.1e-11	TNDRPSIGNLAGANSLLNALPEEVIQHTFNLK
						3445.82	3445.8	0.0224	101.66	7.8e-08	TNDRPSIGNLAGANSLLNALPEEVIQHTFNLK
						3445.82	3445.8	0.0269	125.34	6.6e-11	TNDRPSIGNLAGANSLLNALPEEVIQHTFNLK
						3445.82	3445.8	0.0281	119.13	1.7e-10	TNDRPSIGNLAGANSLLNALPEEVIQHTFNLK
						3445.82	3445.8	0.0296	114.58	4.5e-09	TNDRPSIGNLAGANSLLNALPEEVIQHTFNLK
						3445.83	3445.8	0.0302	141.64	2.4e-12	TNDRPSIGNLAGANSLLNALPEEVIQHTFNLK
						3445.83	3445.8	0.0323	96.13	3.2e-08	TNDRPSIGNLAGANSLLNALPEEVIQHTFNLK
						3445.83	3445.8	0.0356	121.21	1.3e-10	TNDRPSIGNLAGANSLLNALPEEVIQHTFNLK
						3446.78	3445.8	0.9876	81.24	4.7e-06	TNDRPSIGNLAGANSLLNALPEEVIQHTFNLK
						3446.79	3445.8	0.9928	111.97	4.5e-09	TNDRPSIGNLAGANSLLNALPEEVIQHTFNLK
						3446.79	3445.8	0.9936	65.94	0.00012	TNDRPSIGNLAGANSLLNALPEEVIQHTFNLK
						3446.79	3446.78	0.0148	102.08	7.2e-07	TNDRPSIGNLAGANSLLNALPEEVIQHTFNLK
						3446.8	3446.78	0.0168	104.54	2.7e-08	TNDRPSIGNLAGANSLLNALPEEVIQHTFNLK
						3446.8	3446.78	0.0188	47.7	0.00056	TNDRPSIGNLAGANSLLNALPEEVIQHTFNLK
						3446.8	3446.78	0.0218	47.66	0.00027	TNDRPSIGNLAGANSLLNALPEEVIQHTFNLK
						3446.81	3446.78	0.0344	59.65	0.00012	TNDRPSIGNLAGANSLLNALPEEVIQHTFNLK
						3643.82	3643.8	0.0141	87.88	1.8e-05	*QNIGQNSSPDIYNPQAGSITTATSLDFPALWLLK
						3659.85	3660.83	-0.9835	131.79	7e-10	QNIGQNSSPDIYNPQAGSITTATSLDFPALWLLK
						3659.86	3659.85	0.0086	157.45	2.4e-14	QNIGQNSSPDIYNPQAGSITTATSLDFPALWLLK
						3659.88	3659.85	0.0294	155.14	4.7e-14	QNIGQNSSPDIYNPQAGSITTATSLDFPALWLLK
						3660.86	3660.83	0.0263	98.1	2.3e-08	QNIGQNSSPDIYNPQAGSITTATSLDFPALWLLK
						3929.04	3929.03	0.0105	145.62	2.1e-13	LRQNIGQNSSPDIYNPQAGSITTATSLDFPALWLLK
						3929.04	3929.03	0.0114	130.42	4.7e-12	LRQNIGQNSSPDIYNPQAGSITTATSLDFPALWLLK
		P02858-2	Isoform 2 of Glycinin G4	8784	64097	820.412	820.411	0.0007	44.15	0.0084	CAGVTVSK
						820.413	820.411	0.0015	43.17	0.0067	CAGVTVSK
						840.413	840.445	-0.0319	42.48	0.039	PPKESQR
						840.415	840.445	-0.0305	42.46	0.04	PPKESQR
						1093.51	1093.52	-0.0008	38.16	0.038	*QQLQDSHQK
						1093.52	1093.52	0.0042	39.63	0.013	*QQLQDSHQK
						1269.64	1269.65	-0.0084	30.74	0.025	THHNAVTSYLK
						1269.64	1269.65	-0.0039	43.04	0.0019	THHNAVTSYLK
						1269.65	1269.65	0.0045	67.69	5e-05	THHNAVTSYLK
						1269.66	1269.65	0.0123	73.95	1.2e-05	THHNAVTSYLK
						1269.66	1269.65	0.0171	69.4	3.5e-05	THHNAVTSYLK
						1384.69	1384.71	-0.0217	50.33	0.0026	PSEVLAHSYNLR
						1384.7	1384.71	-0.0067	61.59	0.00013	PSEVLAHSYNLR
						1384.71	1384.71	-0.0013	52.68	0.001	PSEVLAHSYNLR
						1384.72	1384.71	0.0148	81.12	9.1e-06	PSEVLAHSYNLR
						1384.74	1384.71	0.026	85.69	7.1e-06	PSEVLAHSYNLR
						1384.74	1384.71	0.032	89.59	6.4e-06	PSEVLAHSYNLR
						1397.8	1397.82	-0.0231	74.62	1.6e-05	ISTLNSLTLPALR
						1397.8	1397.82	-0.0211	75.43	1.3e-05	ISTLNSLTLPALR
						1397.81	1397.82	-0.0139	67.22	8.2e-05	ISTLNSLTLPALR
						1397.82	1397.82	-0.0037	70.93	0.00023	ISTLNSLTLPALR
						1397.83	1397.82	0.0023	72.69	1.6e-05	ISTLNSLTLPALR
						1397.84	1397.82	0.0147	75.68	1.5e-05	ISTLNSLTLPALR
						1454.86	1454.85	0.0166	63.28	0.00024	"ISTLNSLTLPALR
						1499.76	1499.75	0.0101	31.17	0.042	NGLHLPSYSPYPR
						1499.76	1499.75	0.0113	34.09	0.013	NGLHLPSYSPYPR
						1499.77	1499.75	0.0146	37	0.0096	NGLHLPSYSPYPR
						1499.78	1499.75	0.029	36.63	0.027	NGLHLPSYSPYPR
						1499.78	1499.75	0.0312	32.71	0.05	NGLHLPSYSPYPR
						1500.76	1500.74	0.0267	61.9	0.00035	NGLHLPSYSPYPR
						1500.76	1500.74	0.0271	56.95	0.0016	NGLHLPSYSPYPR
						1500.77	1500.74	0.0297	51.38	0.0021	NGLHLPSYSPYPR
						1508.84	1508.85	-0.0004	70.37	0.00099	*QIVTVEGGLSVISPK
						1508.85	1508.85	0.0018	54.41	0.00063	*QIVTVEGGLSVISPK
						1508.85	1508.85	0.0052	70.62	0.00026	*QIVTVEGGLSVISPK
						1508.85	1508.85	0.0054	47.42	0.014	*QIVTVEGGLSVISPK
						1508.85	1508.85	0.0062	70.2	0.00014	*QIVTVEGGLSVISPK
						1508.85	1508.85	0.0072	49.3	0.0013	*QIVTVEGGLSVISPK
						1508.85	1508.85	0.0084	66.1	5.3e-05	*QIVTVEGGLSVISPK
						1508.85	1508.85	0.0096	90.69	3.4e-06	*QIVTVEGGLSVISPK
						1508.86	1508.85	0.0106	92.86	5.8e-06	*QIVTVEGGLSVISPK
						1508.86	1508.85	0.0106	109.12	1.4e-07	*QIVTVEGGLSVISPK
						1508.86	1508.85	0.0114	56.33	0.0013	*QIVTVEGGLSVISPK
						1508.86	1508.85	0.0118	62.2	0.0052	*QIVTVEGGLSVISPK
						1508.86	1508.85	0.0118	94.55	4e-07	*QIVTVEGGLSVISPK
						1508.86	1508.85	0.013	76.68	0.00011	*QIVTVEGGLSVISPK
						1508.86	1508.85	0.0146	64.37	0.00014	*QIVTVEGGLSVISPK
						1508.86	1508.85	0.0148	80.44	7.7e-06	*QIVTVEGGLSVISPK
						1525.88	1525.87	0.0051	59.68	0.00092	QIVTVEGGLSVISPK
						1525.88	1525.87	0.0061	81.43	2.2e-06	QIVTVEGGLSVISPK
						1525.88	1525.87	0.0065	98.86	2.6e-07	QIVTVEGGLSVISPK
						1525.88	1525.87	0.0087	86	2.3e-06	QIVTVEGGLSVISPK
						1525.88	1525.87	0.0089	72.75	5.8e-05	QIVTVEGGLSVISPK
						1525.88	1525.87	0.0089	71.2	5.2e-05	QIVTVEGGLSVISPK
						1525.88	1525.87	0.0095	80.68	2e-05	QIVTVEGGLSVISPK
						1525.88	1525.87	0.0097	83.93	2.2e-06	QIVTVEGGLSVISPK
						1525.88	1525.87	0.0101	77.86	1.8e-05	QIVTVEGGLSVISPK
						1525.88	1525.87	0.0101	55.87	0.0015	QIVTVEGGLSVISPK
						1525.88	1525.87	0.0103	79.3	1.4e-05	QIVTVEGGLSVISPK
						1525.88	1525.87	0.0107	61.16	0.0012	QIVTVEGGLSVISPK
						1525.88	1525.87	0.0107	92.44	5.5e-07	QIVTVEGGLSVISPK
						1525.88	1525.87	0.0109	75.37	5.1e-05	QIVTVEGGLSVISPK
						1525.88	1525.87	0.0113	63.44	0.00053	QIVTVEGGLSVISPK
						1525.88	1525.87	0.0135	59.74	0.00016	QIVTVEGGLSVISPK
						1525.89	1525.87	0.0137	89.15	1.2e-06	QIVTVEGGLSVISPK
						1525.89	1525.87	0.0141	48.26	0.046	QIVTVEGGLSVISPK
						1525.89	1525.87	0.0151	48.25	0.0049	QIVTVEGGLSVISPK
						1525.89	1525.87	0.0153	76.23	1.8e-05	QIVTVEGGLSVISPK
						1525.89	1525.87	0.0153	82.42	4.8e-06	QIVTVEGGLSVISPK
						1525.89	1525.87	0.0155	74.21	2.6e-05	QIVTVEGGLSVISPK
						1525.89	1525.87	0.0157	77.1	1.4e-05	QIVTVEGGLSVISPK
						1525.89	1525.87	0.0163	92.3	1e-06	QIVTVEGGLSVISPK
						1525.89	1525.87	0.0163	97.07	2.1e-07	QIVTVEGGLSVISPK
						1525.89	1525.87	0.0167	81.92	5.5e-06	QIVTVEGGLSVISPK
						1525.89	1525.87	0.0167	92.36	5.4e-07	QIVTVEGGLSVISPK
						1525.89	1525.87	0.0173	81.01	3.3e-05	QIVTVEGGLSVISPK
						1525.89	1525.87	0.0175	85.75	2.3e-06	QIVTVEGGLSVISPK
						1525.89	1525.87	0.0183	86.99	1.7e-06	QIVTVEGGLSVISPK
						1525.89	1525.87	0.0185	71.96	1.9e-05	QIVTVEGGLSVISPK
						1525.89	1525.87	0.0189	61.76	0.00015	QIVTVEGGLSVISPK
						1525.89	1525.87	0.0199	68.22	6.7e-05	QIVTVEGGLSVISPK
						1525.89	1525.87	0.0217	76.22	1.6e-05	QIVTVEGGLSVISPK
						1525.89	1525.87	0.0219	67.31	8.2e-05	QIVTVEGGLSVISPK
						1525.89	1525.87	0.0229	77.77	6.5e-06	QIVTVEGGLSVISPK
						1525.89	1525.87	0.0235	91.09	1.3e-06	QIVTVEGGLSVISPK
						1525.9	1525.87	0.0289	86.35	3.5e-06	QIVTVEGGLSVISPK
						1525.9	1525.87	0.0289	81.01	4.8e-06	QIVTVEGGLSVISPK
						1525.9	1525.87	0.0325	36.43	0.0068	QIVTVEGGLSVISPK
						1525.91	1525.87	0.0339	84.96	1.6e-06	QIVTVEGGLSVISPK
						1568.84	1568.83	0.0088	54.77	0.00062	AIPSEVLAHSYNLR
						1568.84	1568.83	0.0112	70.46	2e-05	AIPSEVLAHSYNLR
						1568.85	1568.83	0.0142	115.86	5.2e-09	AIPSEVLAHSYNLR
						1568.85	1568.83	0.0208	101	1.7e-08	AIPSEVLAHSYNLR
						1568.85	1568.83	0.0214	74.04	9.3e-06	AIPSEVLAHSYNLR
						1568.86	1568.83	0.0338	113.04	9.4e-09	AIPSEVLAHSYNLR
						1644.84	1644.86	-0.0227	36.96	0.02	NPFSFLVPPKESQR
						1653.97	1653.97	0.0026	54.87	0.0015	KQIVTVEGGLSVISPK
						1653.97	1653.97	0.0044	59.76	0.0021	KQIVTVEGGLSVISPK
						1653.97	1653.97	0.0074	72.58	0.00037	KQIVTVEGGLSVISPK
						1653.97	1653.97	0.0076	50.15	0.0095	KQIVTVEGGLSVISPK
						1653.97	1653.97	0.008	47.51	0.029	KQIVTVEGGLSVISPK
						1653.98	1653.97	0.0088	42.3	0.03	KQIVTVEGGLSVISPK
						1653.98	1653.97	0.01	71.67	0.00081	KQIVTVEGGLSVISPK
						1653.98	1653.97	0.01	56	0.0029	KQIVTVEGGLSVISPK
						1653.98	1653.97	0.0104	57.63	0.0017	KQIVTVEGGLSVISPK
						1653.98	1653.97	0.0104	51.47	0.0034	KQIVTVEGGLSVISPK
						1653.98	1653.97	0.0104	59.75	0.0012	KQIVTVEGGLSVISPK
						1653.98	1653.97	0.011	78.64	2.2e-05	KQIVTVEGGLSVISPK
						1653.98	1653.97	0.011	66.6	0.00077	KQIVTVEGGLSVISPK
						1653.98	1653.97	0.0112	75.72	0.00018	KQIVTVEGGLSVISPK
						1653.98	1653.97	0.0118	57.81	0.00086	KQIVTVEGGLSVISPK
						1653.98	1653.97	0.0121	48.06	0.0042	KQIVTVEGGLSVISPK
						1653.98	1653.97	0.0122	73.12	0.00013	KQIVTVEGGLSVISPK
						1653.98	1653.97	0.0128	82.3	9.3e-06	KQIVTVEGGLSVISPK
						1653.98	1653.97	0.0137	70.94	8.3e-05	KQIVTVEGGLSVISPK
						1653.98	1653.97	0.014	78.6	9.1e-05	KQIVTVEGGLSVISPK
						1653.98	1653.97	0.0142	54.47	0.00089	KQIVTVEGGLSVISPK
						1653.98	1653.97	0.0146	56.5	0.0017	KQIVTVEGGLSVISPK
						1653.98	1653.97	0.0146	54.65	0.00062	KQIVTVEGGLSVISPK
						1653.98	1653.97	0.0147	42.79	0.0096	KQIVTVEGGLSVISPK
						1653.98	1653.97	0.0147	59.1	0.00029	KQIVTVEGGLSVISPK
						1653.98	1653.97	0.0153	73.17	0.00034	KQIVTVEGGLSVISPK
						1653.98	1653.97	0.0157	100.21	1.8e-06	KQIVTVEGGLSVISPK
						1653.98	1653.97	0.0161	103.6	8.1e-07	KQIVTVEGGLSVISPK
						1653.98	1653.97	0.0161	76.53	5.8e-05	KQIVTVEGGLSVISPK
						1653.98	1653.97	0.0169	117.72	3.1e-08	KQIVTVEGGLSVISPK
						1653.99	1653.97	0.019	49.85	0.034	KQIVTVEGGLSVISPK
						1653.99	1653.97	0.0191	70.31	0.0017	KQIVTVEGGLSVISPK
						1653.99	1653.97	0.0193	58.02	0.0062	KQIVTVEGGLSVISPK
						1653.99	1653.97	0.0195	136.54	4.1e-10	KQIVTVEGGLSVISPK
						1653.99	1653.97	0.0235	39.37	0.005	KQIVTVEGGLSVISPK
						1653.99	1653.97	0.0247	78.64	5.7e-05	KQIVTVEGGLSVISPK
						1653.99	1653.97	0.0253	84.74	3.3e-05	KQIVTVEGGLSVISPK
						1653.99	1653.97	0.0257	104.32	6.9e-07	KQIVTVEGGLSVISPK
						1653.99	1653.97	0.0257	72.88	0.00014	KQIVTVEGGLSVISPK
						1653.99	1653.97	0.0279	116.72	4e-08	KQIVTVEGGLSVISPK
						1654	1653.97	0.0327	65.66	8e-05	KQIVTVEGGLSVISPK
						1654	1653.97	0.0383	60.09	0.00013	KQIVTVEGGLSVISPK
						1751.91	1751.89	0.0212	34.79	0.029	HFNEGDVLVIPPGVPY
						1758.89	1758.91	-0.0169	41.01	0.0071	NNPFSFLVPPKESQR
						1758.89	1758.91	-0.0125	50.25	0.002	NNPFSFLVPPKESQR
						1862.88	1862.88	0.001	123.47	8.3e-10	HFLAQSFNTNEDIAEK
						1862.88	1862.88	0.0038	37.31	0.0095	HFLAQSFNTNEDIAEK
						1862.89	1862.88	0.008	56.16	5.7e-05	HFLAQSFNTNEDIAEK
						1862.89	1862.88	0.008	43.06	0.0071	HFLAQSFNTNEDIAEK
						1862.89	1862.88	0.0086	38.65	0.0067	HFLAQSFNTNEDIAEK
						1862.89	1862.88	0.0101	24.03	0.047	HFLAQSFNTNEDIAEK
						1862.89	1862.88	0.0114	109.14	4.3e-09	HFLAQSFNTNEDIAEK
						1862.89	1862.88	0.0122	33.79	0.031	HFLAQSFNTNEDIAEK
						1862.89	1862.88	0.0144	116.27	1.3e-09	HFLAQSFNTNEDIAEK
						1862.9	1862.88	0.0154	98.12	1.4e-07	HFLAQSFNTNEDIAEK
						1862.9	1862.88	0.0162	57.87	5.7e-05	HFLAQSFNTNEDIAEK
						1862.9	1862.88	0.0166	99.83	2.7e-08	HFLAQSFNTNEDIAEK
						1862.9	1862.88	0.0168	65.59	2.6e-05	HFLAQSFNTNEDIAEK
						1862.9	1862.88	0.0172	74.19	4.6e-06	HFLAQSFNTNEDIAEK
						1862.9	1862.88	0.019	65.78	2e-05	HFLAQSFNTNEDIAEK
						1862.9	1862.88	0.019	106.56	6.5e-08	HFLAQSFNTNEDIAEK
						1862.9	1862.88	0.0197	55.63	0.0016	HFLAQSFNTNEDIAEK
						1862.9	1862.88	0.0212	70.7	6.1e-06	HFLAQSFNTNEDIAEK
						1862.9	1862.88	0.0212	34.05	0.03	HFLAQSFNTNEDIAEK
						1862.9	1862.88	0.0215	62.88	0.00054	HFLAQSFNTNEDIAEK
						1862.9	1862.88	0.0228	33.08	0.017	HFLAQSFNTNEDIAEK
						1862.9	1862.88	0.0232	62.87	2.7e-05	HFLAQSFNTNEDIAEK
						1862.9	1862.88	0.0236	51.69	0.0039	HFLAQSFNTNEDIAEK
						1862.9	1862.88	0.024	93.91	1.3e-07	HFLAQSFNTNEDIAEK
						1862.9	1862.88	0.0242	32.14	0.044	HFLAQSFNTNEDIAEK
						1862.91	1862.88	0.0278	103.5	1.3e-08	HFLAQSFNTNEDIAEK
						1862.91	1862.88	0.0288	124.33	3.4e-10	HFLAQSFNTNEDIAEK
						1862.91	1862.88	0.0304	83.39	5.3e-07	HFLAQSFNTNEDIAEK
						1862.91	1862.88	0.0306	27.73	0.032	HFLAQSFNTNEDIAEK
						1862.91	1862.88	0.0338	112.52	5.3e-09	HFLAQSFNTNEDIAEK
						1862.91	1862.88	0.0348	124.44	1.1e-09	HFLAQSFNTNEDIAEK
						1862.91	1862.88	0.035	94.32	3.2e-08	HFLAQSFNTNEDIAEK
						1862.92	1862.88	0.0362	76.56	2.1e-06	HFLAQSFNTNEDIAEK
						1862.92	1862.88	0.038	107.24	7.6e-09	HFLAQSFNTNEDIAEK
						1862.92	1862.88	0.0384	114.93	2.8e-09	HFLAQSFNTNEDIAEK
						1862.92	1862.88	0.0384	88.21	2.3e-07	HFLAQSFNTNEDIAEK
						1862.92	1862.88	0.0422	102.02	2.3e-08	HFLAQSFNTNEDIAEK
						1862.92	1862.88	0.0422	104.73	8.6e-09	HFLAQSFNTNEDIAEK
						1872.89	1872.95	-0.057	69.13	5.9e-05	NNNPFSFLVPPKESQR
						1872.89	1872.95	-0.055	68.8	0.0015	NNNPFSFLVPPKESQR
						1872.91	1872.95	-0.0412	68.79	0.0023	NNNPFSFLVPPKESQR
						1872.92	1872.95	-0.0257	36.43	0.031	NNNPFSFLVPPKESQR
						1872.93	1872.95	-0.019	32.95	0.022	NNNPFSFLVPPKESQR
						1872.93	1872.95	-0.0176	51.42	0.00066	NNNPFSFLVPPKESQR
						1872.93	1872.95	-0.0134	66.33	4.2e-05	NNNPFSFLVPPKESQR
						1873.91	1873.93	-0.0174	48.99	0.00081	NNNPFSFLVPPKESQR
						1873.92	1872.95	0.9722	65.98	3.1e-05	NNNPFSFLVPPKESQR
						1873.92	1873.93	-0.0098	69.26	1.7e-05	NNNPFSFLVPPKESQR
						1873.93	1873.93	-0.0056	69.24	2e-05	NNNPFSFLVPPKESQR
						1874.89	1873.93	0.953	68.46	6.6e-06	NNNPFSFLVPPKESQR
						1875.94	1875.9	0.0416	54.27	0.00024	NNNPFSFLVPPKESQR
						1875.94	1875.9	0.0444	53.88	0.00024	NNNPFSFLVPPKESQR
						1929.96	1929.97	-0.008	53.41	0.001	"NNNPFSFLVPPKESQR
						2049.98	2049.95	0.0255	83.11	1e-06	LNECQLNNLNALEPDHR
						2049.98	2049.95	0.0257	77.52	1.4e-05	LNECQLNNLNALEPDHR
						2049.99	2049.95	0.0321	102.41	3.7e-08	LNECQLNNLNALEPDHR
						2049.99	2049.95	0.0337	61.3	0.00055	LNECQLNNLNALEPDHR
						2049.99	2049.95	0.0357	69.27	0.00014	LNECQLNNLNALEPDHR
						2049.99	2049.95	0.0375	97.25	3.5e-07	LNECQLNNLNALEPDHR
						2098.08	2098.1	-0.0154	55.82	0.0017	LTLNRNGLHLPSYSPYPR
						2098.1	2098.1	0.001	48.4	0.0047	LTLNRNGLHLPSYSPYPR
						2098.1	2098.1	0.0046	43.75	0.021	LTLNRNGLHLPSYSPYPR
						2098.1	2098.1	0.0078	56.5	0.00077	LTLNRNGLHLPSYSPYPR
						2098.11	2098.1	0.0106	57.29	0.00023	LTLNRNGLHLPSYSPYPR
						2098.12	2098.1	0.0279	74.22	4.6e-06	LTLNRNGLHLPSYSPYPR
						2098.13	2098.1	0.0313	62.86	6.4e-05	LTLNRNGLHLPSYSPYPR
						2098.13	2098.1	0.0345	72.96	8.8e-06	LTLNRNGLHLPSYSPYPR
						2099.09	2099.08	0.0099	40.91	0.048	LTLNRNGLHLPSYSPYPR
						2151.06	2151.06	0.0001	130.61	2.4e-10	VESEGGLIQTWNSQHPELK
						2151.1	2151.06	0.0378	87.67	1.6e-05	VESEGGLIQTWNSQHPELK
						2151.1	2151.06	0.0378	83.94	3.3e-05	VESEGGLIQTWNSQHPELK
						2151.1	2151.06	0.0398	92.81	3.9e-06	VESEGGLIQTWNSQHPELK
						2233.82	2233.8	0.0159	121	1e-09	EQDQDQDEDEDEDEDQPR
						2233.82	2233.8	0.0179	120.78	1.1e-09	EQDQDQDEDEDEDEDQPR
						2233.82	2233.8	0.0211	120.84	1.1e-09	EQDQDQDEDEDEDEDQPR
						2271.98	2271.99	-0.008	136.08	9.9e-12	*QGQHQQEEEEEGGSVLSGFSK
						2271.99	2271.99	-0.0022	137.34	1.1e-11	*QGQHQQEEEEEGGSVLSGFSK
						2271.99	2271.99	0	135.87	1.5e-11	*QGQHQQEEEEEGGSVLSGFSK
						2272.02	2271.99	0.0354	84.47	5.1e-07	*QGQHQQEEEEEGGSVLSGFSK
						2289.03	2289.01	0.0197	118.85	2.2e-08	QGQHQQEEEEEGGSVLSGFSK
						2289.04	2289.01	0.0218	85.67	4.6e-05	QGQHQQEEEEEGGSVLSGFSK
						2289.04	2289.01	0.0233	81.86	0.00011	QGQHQQEEEEEGGSVLSGFSK
						2289.04	2289.01	0.0259	119.95	1.7e-08	QGQHQQEEEEEGGSVLSGFSK
						2289.05	2289.01	0.0356	91.16	1.3e-05	QGQHQQEEEEEGGSVLSGFSK
						2289.05	2289.01	0.0387	122.04	1e-08	QGQHQQEEEEEGGSVLSGFSK
						2318.16	2318.14	0.0166	70.1	6.8e-06	NGIYSPHWNLNANSVIYVTR
						2318.16	2318.14	0.0196	90.39	6.9e-08	NGIYSPHWNLNANSVIYVTR
						2361.91	2361.9	0.012	97.36	9.6e-08	EQDQDQDEDEDEDEDQPRK
						2361.91	2361.9	0.0148	70.01	2.4e-05	EQDQDQDEDEDEDEDQPRK
						2361.91	2361.9	0.0165	89.18	3e-07	EQDQDQDEDEDEDEDQPRK
						2361.92	2361.9	0.0204	55.95	0.0013	EQDQDQDEDEDEDEDQPRK
						2485.19	2485.15	0.0328	37.38	0.012	"ALGVAIPGCPETFEEPQEQSNR
						2585.1	2585.11	-0.0064	78.15	8.8e-06	EQDEDEDEDEDKPRPSRPSQGK
						2585.11	2585.11	0.0033	53.1	0.00032	EQDEDEDEDEDKPRPSRPSQGK
						2585.12	2585.11	0.0098	33.17	0.021	EQDEDEDEDEDKPRPSRPSQGK
						2585.12	2585.11	0.0103	91.2	7e-07	EQDEDEDEDEDKPRPSRPSQGK
						2585.13	2585.11	0.0144	84.46	1.3e-06	EQDEDEDEDEDKPRPSRPSQGK
						2585.13	2585.11	0.0181	94.34	4.8e-07	EQDEDEDEDEDKPRPSRPSQGK
						2585.13	2585.11	0.0199	79.72	5e-06	EQDEDEDEDEDKPRPSRPSQGK
						2754.31	2754.3	0.0093	68.66	5.8e-06	VFYLAGNPDIEYPETMQQQQQQK
						2754.32	2754.3	0.0192	65.97	1.1e-05	VFYLAGNPDIEYPETMQQQQQQK
						2754.35	2754.3	0.0516	66.22	8.6e-06	VFYLAGNPDIEYPETMQQQQQQK
						2770.33	2770.29	0.0418	48.86	0.00038	VFYLAGNPDIEYPETMQQQQQQK
						2770.34	2770.29	0.046	61.82	1.1e-05	VFYLAGNPDIEYPETMQQQQQQK
						2770.34	2770.29	0.0517	40.34	0.0018	VFYLAGNPDIEYPETMQQQQQQK
						2811.32	2811.32	0.0037	52.48	0.00024	"VFYLAGNPDIEYPETMQQQQQQK
						2811.33	2811.32	0.0157	77.24	1.7e-06	"VFYLAGNPDIEYPETMQQQQQQK
						2811.34	2811.32	0.0199	57.21	4.1e-05	"VFYLAGNPDIEYPETMQQQQQQK
						2954.43	2954.44	-0.0151	72.46	0.00079	VESEGGLIQTWNSQHPELKCAGVTVSK
						2955.43	2955.43	0.0028	108.67	1.9e-07	VESEGGLIQTWNSQHPELKCAGVTVSK
						2955.43	2955.43	0.0028	90.65	1.2e-05	VESEGGLIQTWNSQHPELKCAGVTVSK
						2955.43	2955.43	0.0031	94.22	5.3e-06	VESEGGLIQTWNSQHPELKCAGVTVSK
						3209.25	3209.25	0.0074	138.32	9.2e-12	WQEQQDEDEDEDEDDEDEQIPSHPPR
						3209.29	3209.25	0.0452	206.59	8.9e-18	WQEQQDEDEDEDEDDEDEQIPSHPPR
[truncated: 1,923 more rows]
