# Supplementary material for: Proteomic Characterization of a Lunasin-Enriched Soybean Extract Potentially Useful in the Treatment of <i>Helicobacter pylori </i>Infection
Source: Preprints.org preprint supplement (doi:10.20944/preprints202406.0165.v1), 2024-06-04
Supplement: Supplementary file 2 [file Table_S2_Franca-Oliveira.xlsx]

## Sheet: Planilha1
						Protein Experimental Amount (fmol) in LES
						Five injections or five technical replicates					Protein Total Amount (fmol)
Accession	Peptide count	Unique peptides	Confidence score	Mass (Da)	Description	Replicate 1	Replicate 2	Replicate 3	Replicate 4	Replicate 5	Average	Percentage (%)
P04776	83	48	801.496	56333.7	Glycinin G1	8557.47	6412.8	9134.99	8330.79	9018.35	8290.88	12.3887
P0DO15;I1NGH2;K7KGR6;K7N005;P0DO16	75	54	813.699	70591.4	Beta-conglycinin alpha subunit 2	7509.56	7227.56	6986.92	6783.96	7270.35	7155.67	10.6924
P02858	80	66	782.678	64253.6	Glycinin G4	6361.03	6030.65	4964.62	6246.42	6112.99	5943.14	8.88055
P19594	32	32	235.107	19030.3	2S seed storage albumin protein	5922.58	5762.79	5844.48	5949.68	6218.03	5939.51	8.87512
P11827	95	77	692.061	72513.2	Beta-conglycinin alpha' subunit	4078.41	3749.27	3649.15	4152.72	4070.12	3939.93	5.88725
A0A0R0GMV1	48	10	567.375	55600.2	Glycinin G1 (Fragment)	3934.46	3603.68	3922.95	3971.51	3648.54	3816.23	5.70241
P01070;A0A0R0IWE9;I1KYW9;Q39898	49	36	293.944	24290.5	Trypsin inhibitor A	3581.16	3308.31	3969.32	3632.82	3806.14	3659.55	5.46829
K7LEQ5	36	29	339.188	26687.1	Dehydrin	3925.83	3136.86	3429.21	3224.95	3694	3482.17	5.20324
Q9ZNZ4	33	32	255.073	18405	Napin-type 2S albumin 1	1958.42	1662.84	1992.41	1737.47	1942.98	1858.82	2.77755
P04405	67	23	612.415	54961.1	Glycinin G2	1412.17	1542.34	1707.74	1703.05	1601.29	1593.32	2.38082
P25974;A0A0R0I6G3	70	29	505.482	50533	Beta-conglycinin beta subunit 1	1298.41	1130.24	1436.33	1071.06	1140.17	1215.24	1.81588
I1NGG4	29	24	252.518	26172.2	Late embryogenesis abundant protein D-34-like	1172.34	946.942	1022.13	977.163	1016.62	1027.04	1.53465
P11828	48	18	537.144	54869.1	Glycinin G3	925.332	900.433	1122.12	1156.77	1026.91	1026.31	1.53357
F7J077	38	2	496.998	50498.9	Beta-conglycinin beta subunit 2	1090.93	949.636	1206.82	899.917	957.983	1021.06	1.52572
P22895;O64458	6	5	52.932	43136	P34 probable thiol protease	936.057	845.2	686.479	840.797	880.902	837.887	1.25201
P01064;I1MQD2	12	12	123.672	10323.2	Bowman-Birk type proteinase inhibitor D-II	971.03	801.353	417.68	779.045	878.473	769.516	1.14985
P29531	13	7	140.984	23392.7	P24 oleosin isoform B	748.739	577.44	826.117	692.911	836.006	736.243	1.10013
P04347	51	12	460.16	58412.4	Glycinin G5	745.41	680.405	785.812	737.92	703.955	730.701	1.09185
P05046	8	8	62.1755	30928	Lectin	684.087	630.415	816.42	738.298	644.701	702.784	1.05014
I1L957	42	28	375.047	48795.6	Late embryogenesis abundant protein LEA	685.268	668.789	633.657	591.605	679.487	651.761	0.973895
P25272;C6SWW4	13	8	134.201	22831.1	Kunitz-type trypsin inhibitor KTI1	603.755	559.822	756.102	637.235	585.133	628.409	0.939002
Q9XET0	15	14	167.743	15154.4	Seed maturation protein PM30	545.125	449.322	580.958	437.087	546.002	511.699	0.764606
Q39846;I1M3M9	31	25	276.224	67935.1	Seed biotin-containing protein SBP65	537.477	496.339	518.324	485.649	496.843	506.927	0.757476
I1JLC8	12	7	136.92	11505.4	Protein SLE2	482.873	478.056	492.501	401.936	533.691	477.812	0.71397
Q42447	13	10	130.57	25659	Maturation protein	578.9	488.665	266.786	429.451	477.497	448.26	0.669813
I1L860;I1L862	35	10	419.084	58389.9	Sucrose-binding protein-like	480.13	447.623	341.631	427.355	430.45	425.438	0.635711
I1KRP4;A0A0R0IQA7	3	1	17.9597	50856.2	C2H2-type domain-containing protein	366.819	327.028	516.518	446.586	434.597	418.31	0.62506
I1LE41	16	11	189.511	26296.1	Late embryogenesis abundant protein D-34-like	462.039	385.678	397.657	403.731	399.56	409.733	0.612244
I1N747	9	2	118.506	23588.9	Oleosin	397.869	363.015	418.872	338.204	431.178	389.828	0.5825
I1JPV0;I1NAH1;Q9ZTY1	16	11	169.544	34565.2	Late embryogenesis abundant protein LEA	370.465	359.823	437.788	327.696	371.429	373.44	0.558014
Q9XET1	17	16	134.713	17918	Seed maturation protein PM31	338.057	318.01	384.267	429.693	339.551	361.916	0.540793
O23957	5	5	36.2775	17319.9	Dehydrin	345.327	314.997	411.677	357.884	305.213	347.02	0.518535
I1L849	28	26	259.896	27512.7	Late embryogenesis abundant protein D-34-like	389.323	342.565	297.894	340.881	350.142	344.161	0.514263
A0A0R0HYM3	21	14	210.421	69826.2	Beta-conglycinin alpha subunit	310.675	263.704	316.726	278.77	293.766	292.728	0.43741
A0A0R0KRW0	38	1	494.776	43699.4	Cupin type-1 domain-containing protein	300.012	290.031	230.711	241.959	282.244	268.991	0.401941
P01055;A0A0R0IF61;I1L3Q3;I1MAC4	7	7	68.7649	12947.4	Bowman-Birk type proteinase inhibitor	236.711	268.329	280.03	250.277	261.327	259.335	0.387511
Q8RVH5	19	7	155.325	47889.4	Basic 7S globulin 2	240.135	242.347	324.77	237.392	242.717	257.472	0.384728
K7KTR9	6	3	64.4309	22711.7	Oleosin	272.766	253.125	279.574	198.735	233.821	247.604	0.369983
C6T588;C6TFW4;Q43453	10	3	102.937	16817.8	Bet_v_1 domain-containing protein	243.089	240.023	249.161	231.096	258.082	244.29	0.365031
Q9XES8	5	5	62.4301	9512.27	Seed maturation protein PM28	224.358	189.418	250.975	181.012	236.727	216.498	0.323502
Q39871	25	11	244.566	50643.9	Late embryongenesis abundant protein	201.154	215.497	202.275	176.04	206.783	200.35	0.299373
P00330	14	14	123.668	37305.4	Alcohol dehydrogenase 1	200	200	200	200	200	200	0.29885
P13917	24	12	171.965	47134.5	Basic 7S globulin	185.6	170.164	252.986	207.962	182.485	199.84	0.29861
P02520;A0A0R0II89	4	3	28.2392	8410.59	Class I heat shock protein (Fragment)	171.864	191.052	226.105	193.7	200.487	196.642	0.293832
Q39873	35	19	286.123	49513.8	Lea protein	210.48	165.039	196.83	204.154	202.902	195.881	0.292695
A0A0R0J965;C6TKH0	15	15	109.237	35014.7	Glucose and ribitol dehydrogenase-like	198.151	183.655	184.296	203.49	205.847	195.088	0.29151
P08170;A0A0R0H569;I1M597	16	12	130.627	94597.6	Seed linoleate 13S-lipoxygenase-1	186.977	203.168	189.929	197.522	191.845	193.888	0.289717
C3VHQ8;I1JUP4	9	4	62.4846	17473.9	Oleosin	177.215	188.706	216.655	153.421	164.189	180.037	0.269021
I1L3Q2;K7LE73;P01063	8	8	58.4912	12918.3	BOWMAN_BIRK domain-containing protein	192.15	164.141	162.045	183.823	186.617	177.755	0.265611
I1LCR7;I1LCR8	2	2	17.0787	26489	RING-type domain-containing protein	153.832	135.096	167.748	181.455	148.851	157.397	0.23519
Q04672	43	14	374.043	60921.9	Sucrose-binding protein	178.254	160.753	93.1247	148.377	164.076	148.917	0.222519
Q39801	33	16	279.509	51096.3	51 kDa seed maturation protein	157.445	137.544	145.548	140.483	154.742	147.152	0.219882
I1JF86	23	12	258.489	58159	Sucrose-binding protein-like	153.442	116.764	177.33	122.384	128.39	139.662	0.20869
A0A0R0LF94	1	1	11.9746	21397.6	RING-type domain-containing protein	136.43	120.237	152.719	158.267	129.754	139.482	0.208421
I1MAV2	1	1	6.2434	53755.6	Glycosyltransferase	123.962	114.297	180.723	147.013	131.264	139.452	0.208376
I1JSX0;I1K7E6	3	3	26.5746	10970.2	AT-hook motif nuclear-localized protein	151.195	106.897	133.019	102.746	145.375	127.846	0.191035
I1N2Z5	11	6	106.665	12246.4	Protein SLE1	125.19	131.092	136.894	101.217	139.504	126.779	0.18944
I7FST9;I1JZ42;I1JZ43	11	5	104.485	59000.1	Protein disulfide-isomerase	133.249	118.878	136.546	121.958	119.729	126.072	0.188383
I1KAB7	10	2	77.2272	56400.3	Protein disulfide-isomerase	129.84	105.08	142.47	122.064	114.532	122.797	0.18349
C6TMA8	3	2	34.3954	12236.4	Nodulin-related protein 1	141.141	104.285	121.701	112.162	122.475	120.353	0.179837
I1NAQ2;A0A0R0FJH4;A0A0R0JCB6;C6SXX2;C6T4R9;I1JQ42;I1KAY5;I1KLN6;I1L0E5;I1L8T7;I1LYE4;I1LYE5;I1M076;I1M077;I1MG31;I1MS00;K7LZM7;P69325	3	3	30.5472	13124.3	Ubiquitin-like domain-containing protein	142.306	121.48	99.9026	115.739	111.196	118.125	0.176508
Q01527	6	3	53.5863	15581.3	Maturation protein	127.63	96.5127	131.357	106.733	124.103	117.267	0.175226
Q01417	6	5	64.6312	17606.3	18 kDa seed maturation protein	116.586	99.8426	111.058	84.7547	120.509	106.55	0.159213
K7L3M0	8	1	91.5272	16844.9	Bet_v_1 domain-containing protein	121.262	110.607	87.7885	91.6989	112.622	104.796	0.156591
Q9S7N8	4	3	41.1419	10060.9	Seed maturation protein PM21	126.287	84.0858	103.653	93.2262	91.2999	99.7103	0.148992
I1LXD1;A0A0R4J4U4	10	10	97.0269	39382.9	Alcohol dehydrogenase 1	93.5707	86.099	89.9795	88.9111	87.4377	89.1996	0.133287
Q9SWB2	4	4	31.983	8234.93	Seed maturation protein PM41	83.3358	85.9743	120.697	54.2083	88.6615	86.5754	0.129365
C6TMB5;A0A0R0HHB6;I1L8V8;I1LZ47	3	3	17.0911	17947.8	60S ribosomal protein L12-3-like	91.2526	96.7823	77.9197	88.1083	61.4973	83.112	0.12419
A0A0R0L186	3	2	16.3798	17293.6	SHSP domain-containing protein	75.301	72.3343	96.5381	66.652	85.4506	79.2552	0.118427
I1KIA5;K7KC26	1	1	6.0588	34438.9	Protein KTI12 homolog	81.8234	92.2945	66.4384	75.4956	70.9187	77.3941	0.115646
I1JFL5	5	4	35.1842	14721.7	Inhibitor I9 domain-containing protein	76.1049	84.2791	74.1874	69.9291	72.2347	75.347	0.112587
A0A0R0H2H7	2	2	20.1092	13833.1	Cupin type-1 domain-containing protein	69.7261	67.4514	65.8769	76.0939	69.5772	69.7451	0.104217
I1LHP6	7	2	49.9634	82053.1	Cupin type-1 domain-containing protein	80.4167	71.5332	46.8553	60.1223	69.0664	65.5988	0.098021
A0A0R0GYR2;I1M5J5;K7M904	3	3	20.4166	50255	PRONE domain-containing protein	69.9992	65.6456	38.1913	64.7106	66.1313	60.9356	0.0910531
I1JRC1;A0A0R0KTI8	4	2	22.5122	223734	DNA polymerase	51.353	42.6068	66.032	57.4639	57.5612	55.0034	0.0821888
C6T0L2	6	1	76.7669	11141.1	Protein SLE3	48.7692	51.3831	47.5757	38.7828	53.2711	47.9564	0.0716589
K7LV51;A0A0R0JKR3;K7KWQ9;K7M247	7	4	58.0093	112891	Protein kinase domain-containing protein	45.7842	38.7701	63.756	47.1396	40.6571	47.2214	0.0705606
K7KQ35;A0A0R0K1X5	3	1	22.5915	49761.2	C2H2-type domain-containing protein	33.2766	32.0841	47.9862	46.0461	42.7587	40.4303	0.0604131
P24337;I1MG41;I1MG42	2	2	20.6699	8815.07	Hydrophobic seed protein	43.1542	31.1773	48.1733	36.3441	33.2263	38.415	0.0574017
I1M005;C6T9Z5	4	4	28.3557	42239.2	Formate dehydrogenase_ mitochondrial	39.6463	30.5073	48.8377	38.0679	29.6502	37.3419	0.0557982
I1MXZ6;A0A0R0FSI6	3	3	17.3111	13490.5	Thioredoxin domain-containing protein	30.2437	31.1356	40.9114	40.0722	34.3737	35.3473	0.0528177
P26987;I1KMV0	7	2	59.3606	16771.8	Stress-induced protein SAM22	37.8194	37.0322	28.2303	28.3767	40.67	34.4257	0.0514407
I1L2M6	4	2	29.665	23228.5	Seed maturation protein	35.0999	30.811	38.5675	31.213	35.06	34.1503	0.0510291
K7K4G2	8	3	54.5728	72028.4	Cupin type-1 domain-containing protein	38.9237	37.1475	28.3171	28.5545	33.703	33.3292	0.0498021
A0A0R0HG00	5	1	48.3662	112180	Protein kinase domain-containing protein	32.5059	24.6778	34.3185	28.0535	28.8085	29.6728	0.0443386
P01071	12	1	170.575	20268.7	Trypsin inhibitor B	27.7134	25.7557	30.0026	26.7607	29.4914	27.9447	0.0417565
A0A0R0H9A9;A0A0R0HLL3	7	2	58.4798	112001	Protein kinase domain-containing protein	28.9026	23.352	33.8436	27.6531	25.0027	27.7508	0.0414667
I1KZ04	2	2	11.2892	43438.1	Cytochrome b561 and DOMON domain-containing protein	25.4026	19.2107	18.4154	20.0239	22.2012	21.0508	0.0314551
P25273	6	1	65.0868	23085.4	Kunitz-type trypsin inhibitor KTI2	22.5877	18.9266	18.4874	22.1542	21.8459	20.8004	0.031081
I1L235	1	1	4.8837	36253.9	Nucleolin-like	20.4273	14.8216	26.3447	16.0716	18.0104	19.1351	0.0285927
I1M596	7	3	47.9593	97560.1	Lipoxygenase	15.7217	16.4638	19.4103	20.4936	18.8579	18.1894	0.0271796
K7MNJ5	1	1	4.0682	67239.7	Growth-regulating factor	21.7145	13.6013	15.6651	12.5507	16.6541	16.0372	0.0239635
P29530	10	2	105.334	23501.7	P24 oleosin isoform A	10.4382	7.81285	13.8326	7.32774	10.1183	9.90594	0.014802
I1NDJ4	2	1	18.4933	12521.7	Nodulin-related protein 1	12.0796	8.65715	9.13602	9.29271	10.1904	9.87116	0.01475
I1MCI2	3	2	25.1033	11271.2	Seed maturation protein	9.08357	7.6375	9.03619	5.24552	7.56763	7.71408	0.0115268
A0A0R0JFL1	8	1	53.2358	48563	Protein disulfide-isomerase	6.33462	5.5688	7.47159	6.38469	5.76198	6.30434	0.00942026
P09186	25	1	208.215	97157.5	Seed linoleate 9S-lipoxygenase-3	4.3353	4.32522	4.53941	4.28158	4.46231	4.38876	0.00655792
K7LW58	5	1	44.3598	57330.2	Seed biotin-containing protein SBP65-like	3.88566	4.6165	5.02726	3.02647	4.07998	4.12718	0.00616704
K7LRE0	2	0	10.0252	10352.8	Glutaredoxin domain-containing protein
B3TDK6	25	0	221.026	97167.4	Lipoxygenase
A0A0R0KK84	48	0	684.025	55308.5	Glycinin G1
K7N3H7	5	0	72.4539	44206	Cupin type-1 domain-containing protein
I1K2B4	2	0	20.3168	9769.65	Late embryogenesis abundant protein_ LEA-18
Total											66923.2	100

## Sheet: Planilha2
P0DO15;I1NGH2;K7KGR6;K7N005;P0DO16	75	54	813.699	70591.4	Beta-conglycinin alpha subunit 2	7509.56	7227.56	6986.92	6783.96	7270.35	7155.67
P04776	83	48	801.496	56333.7	Glycinin G1	8557.47	6412.8	9134.99	8330.79	9018.35	8290.88
P02858	80	66	782.678	64253.6	Glycinin G4	6361.03	6030.65	4964.62	6246.42	6112.99	5943.14
P11827	95	77	692.061	72513.2	Beta-conglycinin alpha' subunit	4078.41	3749.27	3649.15	4152.72	4070.12	3939.93
A0A0R0GMV1	48	10	567.375	55600.2	Glycinin G1 (Fragment)	3934.46	3603.68	3922.95	3971.51	3648.54	3816.23
P19594	32	32	235.107	19030.3	2S seed storage albumin protein	5922.58	5762.79	5844.48	5949.68	6218.03	5939.51
K7LEQ5	36	29	339.188	26687.1	Dehydrin	3925.83	3136.86	3429.21	3224.95	3694	3482.17
P01070;A0A0R0IWE9;I1KYW9;Q39898	49	36	293.944	24290.5	Trypsin inhibitor A	3581.16	3308.31	3969.32	3632.82	3806.14	3659.55
P04405	67	23	612.415	54961.1	Glycinin G2	1412.17	1542.34	1707.74	1703.05	1601.29	1593.32
P25974;A0A0R0I6G3	70	29	505.482	50533	Beta-conglycinin beta subunit 1	1298.41	1130.24	1436.33	1071.06	1140.17	1215.24
P11828	48	18	537.144	54869.1	Glycinin G3	925.332	900.433	1122.12	1156.77	1026.91	1026.31
F7J077	38	2	496.998	50498.9	Beta-conglycinin beta subunit 2	1090.93	949.636	1206.82	899.917	957.983	1021.06
P04347	51	12	460.16	58412.4	Glycinin G5	745.41	680.405	785.812	737.92	703.955	730.701
P22895;O64458	6	5	52.932	43136	P34 probable thiol protease	936.057	845.2	686.479	840.797	880.902	837.887
Q39846;I1M3M9	31	25	276.224	67935.1	Seed biotin-containing protein SBP65	537.477	496.339	518.324	485.649	496.843	506.927
Q9ZNZ4	33	32	255.073	18405	Napin-type 2S albumin 1	1958.42	1662.84	1992.41	1737.47	1942.98	1858.82
I1L957	42	28	375.047	48795.6	Late embryogenesis abundant protein LEA	685.268	668.789	633.657	591.605	679.487	651.761
I1NGG4	29	24	252.518	26172.2	Late embryogenesis abundant protein D-34-like	1172.34	946.942	1022.13	977.163	1016.62	1027.04
I1L860;I1L862	35	10	419.084	58389.9	Sucrose-binding protein-like	480.13	447.623	341.631	427.355	430.45	425.438
P05046	8	8	62.1755	30928	Lectin	684.087	630.415	816.42	738.298	644.701	702.784
I1KRP4;A0A0R0IQA7	3	1	17.9597	50856.2	C2H2-type domain-containing protein	366.819	327.028	516.518	446.586	434.597	418.31
A0A0R0HYM3	21	14	210.421	69826.2	Beta-conglycinin alpha subunit	310.675	263.704	316.726	278.77	293.766	292.728
P08170;A0A0R0H569;I1M597	16	12	130.627	94597.6	Seed linoleate 13S-lipoxygenase-1	186.977	203.168	189.929	197.522	191.845	193.888
P29531	13	7	140.984	23392.7	P24 oleosin isoform B	748.739	577.44	826.117	692.911	836.006	736.243
P25272;C6SWW4	13	8	134.201	22831.1	Kunitz-type trypsin inhibitor KTI1	603.755	559.822	756.102	637.235	585.133	628.409
I1JPV0;I1NAH1;Q9ZTY1	16	11	169.544	34565.2	Late embryogenesis abundant protein LEA	370.465	359.823	437.788	327.696	371.429	373.44
Q8RVH5	19	7	155.325	47889.4	Basic 7S globulin 2	240.135	242.347	324.77	237.392	242.717	257.472
I1JRC1;A0A0R0KTI8	4	2	22.5122	223734	DNA polymerase	51.353	42.6068	66.032	57.4639	57.5612	55.0034
A0A0R0KRW0	38	1	494.776	43699.4	Cupin type-1 domain-containing protein	300.012	290.031	230.711	241.959	282.244	268.991
Q42447	13	10	130.57	25659	Maturation protein	578.9	488.665	266.786	429.451	477.497	448.26
I1LE41	16	11	189.511	26296.1	Late embryogenesis abundant protein D-34-like	462.039	385.678	397.657	403.731	399.56	409.733
Q39871	25	11	244.566	50643.9	Late embryongenesis abundant protein	201.154	215.497	202.275	176.04	206.783	200.35
Q39873	35	19	286.123	49513.8	Lea protein	210.48	165.039	196.83	204.154	202.902	195.881
I1L849	28	26	259.896	27512.7	Late embryogenesis abundant protein D-34-like	389.323	342.565	297.894	340.881	350.142	344.161
P13917	24	12	171.965	47134.5	Basic 7S globulin	185.6	170.164	252.986	207.962	182.485	199.84
I1N747	9	2	118.506	23588.9	Oleosin	397.869	363.015	418.872	338.204	431.178	389.828
Q04672	43	14	374.043	60921.9	Sucrose-binding protein	178.254	160.753	93.1247	148.377	164.076	148.917
I1JF86	23	12	258.489	58159	Sucrose-binding protein-like	153.442	116.764	177.33	122.384	128.39	139.662
P01064;I1MQD2	12	12	123.672	10323.2	Bowman-Birk type proteinase inhibitor D-II	971.03	801.353	417.68	779.045	878.473	769.516
Q9XET0	15	14	167.743	15154.4	Seed maturation protein PM30	545.125	449.322	580.958	437.087	546.002	511.699
Q39801	33	16	279.509	51096.3	51 kDa seed maturation protein	157.445	137.544	145.548	140.483	154.742	147.152
I1MAV2	1	1	6.2434	53755.6	Glycosyltransferase	123.962	114.297	180.723	147.013	131.264	139.452
P00330	14	14	123.668	37305.4	Alcohol dehydrogenase 1	200	200	200	200	200	200
I7FST9;I1JZ42;I1JZ43	11	5	104.485	59000.1	Protein disulfide-isomerase	133.249	118.878	136.546	121.958	119.729	126.072
I1KAB7	10	2	77.2272	56400.3	Protein disulfide-isomerase	129.84	105.08	142.47	122.064	114.532	122.797
A0A0R0J965;C6TKH0	15	15	109.237	35014.7	Glucose and ribitol dehydrogenase-like	198.151	183.655	184.296	203.49	205.847	195.088
Q9XET1	17	16	134.713	17918	Seed maturation protein PM31	338.057	318.01	384.267	429.693	339.551	361.916
O23957	5	5	36.2775	17319.9	Dehydrin	345.327	314.997	411.677	357.884	305.213	347.02
K7KTR9	6	3	64.4309	22711.7	Oleosin	272.766	253.125	279.574	198.735	233.821	247.604
I1JLC8	12	7	136.92	11505.4	Protein SLE2	482.873	478.056	492.501	401.936	533.691	477.812
I1LHP6	7	2	49.9634	82053.1	Cupin type-1 domain-containing protein	80.4167	71.5332	46.8553	60.1223	69.0664	65.5988
K7LV51;A0A0R0JKR3;K7KWQ9;K7M247	7	4	58.0093	112891	Protein kinase domain-containing protein	45.7842	38.7701	63.756	47.1396	40.6571	47.2214
I1LCR7;I1LCR8	2	2	17.0787	26489	RING-type domain-containing protein	153.832	135.096	167.748	181.455	148.851	157.397
C6T588;C6TFW4;Q43453	10	3	102.937	16817.8	Bet_v_1 domain-containing protein	243.089	240.023	249.161	231.096	258.082	244.29
I1LXD1;A0A0R4J4U4	10	10	97.0269	39382.9	Alcohol dehydrogenase 1	93.5707	86.099	89.9795	88.9111	87.4377	89.1996
P01055;A0A0R0IF61;I1L3Q3;I1MAC4	7	7	68.7649	12947.4	Bowman-Birk type proteinase inhibitor	236.711	268.329	280.03	250.277	261.327	259.335
A0A0R0HG00	5	1	48.3662	112180	Protein kinase domain-containing protein	32.5059	24.6778	34.3185	28.0535	28.8085	29.6728
C3VHQ8;I1JUP4	9	4	62.4846	17473.9	Oleosin	177.215	188.706	216.655	153.421	164.189	180.037
A0A0R0H9A9;A0A0R0HLL3	7	2	58.4798	112001	Protein kinase domain-containing protein	28.9026	23.352	33.8436	27.6531	25.0027	27.7508
A0A0R0GYR2;I1M5J5;K7M904	3	3	20.4166	50255	PRONE domain-containing protein	69.9992	65.6456	38.1913	64.7106	66.1313	60.9356
A0A0R0LF94	1	1	11.9746	21397.6	RING-type domain-containing protein	136.43	120.237	152.719	158.267	129.754	139.482
I1KIA5;K7KC26	1	1	6.0588	34438.9	Protein KTI12 homolog	81.8234	92.2945	66.4384	75.4956	70.9187	77.3941
K7K4G2	8	3	54.5728	72028.4	Cupin type-1 domain-containing protein	38.9237	37.1475	28.3171	28.5545	33.703	33.3292
I1L3Q2;K7LE73;P01063	8	8	58.4912	12918.3	BOWMAN_BIRK domain-containing protein	192.15	164.141	162.045	183.823	186.617	177.755
Q9XES8	5	5	62.4301	9512.27	Seed maturation protein PM28	224.358	189.418	250.975	181.012	236.727	216.498
K7KQ35;A0A0R0K1X5	3	1	22.5915	49761.2	C2H2-type domain-containing protein	33.2766	32.0841	47.9862	46.0461	42.7587	40.4303
Q01417	6	5	64.6312	17606.3	18 kDa seed maturation protein	116.586	99.8426	111.058	84.7547	120.509	106.55
Q01527	6	3	53.5863	15581.3	Maturation protein	127.63	96.5127	131.357	106.733	124.103	117.267
I1M596	7	3	47.9593	97560.1	Lipoxygenase OS=Glycine max OX=3847 GN=547774 PE=2 SV=1	15.7217	16.4638	19.4103	20.4936	18.8579	18.1894
K7L3M0	8	1	91.5272	16844.9	Bet_v_1 domain-containing protein	121.262	110.607	87.7885	91.6989	112.622	104.796
P02520;A0A0R0II89	4	3	28.2392	8410.59	Class I heat shock protein (Fragment)	171.864	191.052	226.105	193.7	200.487	196.642
I1M005;C6T9Z5	4	4	28.3557	42239.2	Formate dehydrogenase_ mitochondrial	39.6463	30.5073	48.8377	38.0679	29.6502	37.3419
I1N2Z5	11	6	106.665	12246.4	Protein SLE1	125.19	131.092	136.894	101.217	139.504	126.779
I1NAQ2;A0A0R0FJH4;A0A0R0JCB6;C6SXX2;C6T4R9;I1JQ42;I1KAY5;I1KLN6;I1L0E5;I1L8T7;I1LYE4;I1LYE5;I1M076;I1M077;I1MG31;I1MS00;K7LZM7;P69325	3	3	30.5472	13124.3	Ubiquitin-like domain-containing protein	142.306	121.48	99.9026	115.739	111.196	118.125
C6TMB5;A0A0R0HHB6;I1L8V8;I1LZ47	3	3	17.0911	17947.8	60S ribosomal protein L12-3-like	91.2526	96.7823	77.9197	88.1083	61.4973	83.112
C6TMA8	3	2	34.3954	12236.4	Nodulin-related protein 1	141.141	104.285	121.701	112.162	122.475	120.353
I1JSX0;I1K7E6	3	3	26.5746	10970.2	AT-hook motif nuclear-localized protein	151.195	106.897	133.019	102.746	145.375	127.846
A0A0R0L186	3	2	16.3798	17293.6	SHSP domain-containing protein	75.301	72.3343	96.5381	66.652	85.4506	79.2552
I1JFL5	5	4	35.1842	14721.7	Inhibitor I9 domain-containing protein	76.1049	84.2791	74.1874	69.9291	72.2347	75.347
K7MNJ5	1	1	4.0682	67239.7	Growth-regulating factor	21.7145	13.6013	15.6651	12.5507	16.6541	16.0372
Q9S7N8	4	3	41.1419	10060.9	Seed maturation protein PM21	126.287	84.0858	103.653	93.2262	91.2999	99.7103
A0A0R0H2H7	2	2	20.1092	13833.1	Cupin type-1 domain-containing protein	69.7261	67.4514	65.8769	76.0939	69.5772	69.7451
I1KZ04	2	2	11.2892	43438.1	Cytochrome b561 and DOMON domain-containing protein	25.4026	19.2107	18.4154	20.0239	22.2012	21.0508
I1L2M6	4	2	29.665	23228.5	Seed maturation protein	35.0999	30.811	38.5675	31.213	35.06	34.1503
Q9SWB2	4	4	31.983	8234.93	Seed maturation protein PM41	83.3358	85.9743	120.697	54.2083	88.6615	86.5754
I1L235	1	1	4.8837	36253.9	Nucleolin-like	20.4273	14.8216	26.3447	16.0716	18.0104	19.1351
P26987;I1KMV0	7	2	59.3606	16771.8	Stress-induced protein SAM22	37.8194	37.0322	28.2303	28.3767	40.67	34.4257
P01071	12	1	170.575	20268.7	Trypsin inhibitor B	27.7134	25.7557	30.0026	26.7607	29.4914	27.9447
C6T0L2	6	1	76.7669	11141.1	Protein SLE3	48.7692	51.3831	47.5757	38.7828	53.2711	47.9564
P25273	6	1	65.0868	23085.4	Kunitz-type trypsin inhibitor KTI2	22.5877	18.9266	18.4874	22.1542	21.8459	20.8004
I1MXZ6;A0A0R0FSI6	3	3	17.3111	13490.5	Thioredoxin domain-containing protein	30.2437	31.1356	40.9114	40.0722	34.3737	35.3473
P09186	25	1	208.215	97157.5	Seed linoleate 9S-lipoxygenase-3	4.3353	4.32522	4.53941	4.28158	4.46231	4.38876
P24337;I1MG41;I1MG42	2	2	20.6699	8815.07	Hydrophobic seed protein	43.1542	31.1773	48.1733	36.3441	33.2263	38.415
A0A0R0JFL1	8	1	53.2358	48563	Protein disulfide-isomerase	6.33462	5.5688	7.47159	6.38469	5.76198	6.30434
K7LW58	5	1	44.3598	57330.2	Seed biotin-containing protein SBP65-like	3.88566	4.6165	5.02726	3.02647	4.07998	4.12718
P29530	10	2	105.334	23501.7	P24 oleosin isoform A	10.4382	7.81285	13.8326	7.32774	10.1183	9.90594
I1NDJ4	2	1	18.4933	12521.7	Nodulin-related protein 1	12.0796	8.65715	9.13602	9.29271	10.1904	9.87116
I1MCI2	3	2	25.1033	11271.2	Seed maturation protein	9.08357	7.6375	9.03619	5.24552	7.56763	7.71408
K7LRE0	2	0	10.0252	10352.8	Glutaredoxin domain-containing protein
B3TDK6	25	0	221.026	97167.4	Lipoxygenase
A0A0R0KK84	48	0	684.025	55308.5	Glycinin G1
K7N3H7	5	0	72.4539	44206	Cupin type-1 domain-containing protein
I1K2B4	2	0	20.3168	9769.65	Late embryogenesis abundant protein_ LEA-18
